# Supplementary material for: Comparison of primary and secondary particle formation from natural gas engine exhaust and of their volatility characteristics
Source: Copernicus journal article supplement (doi:10.5194/acp-2017-44), 2017-02-08
Supplement: Supplementary file [file acp-2017-44-AC1-supplement.pdf]

## Relevant changes to manuscript acp-2017-44:

Dear reviewers and editor,

We thank the reviewers for taking time to read our paper and for their insightful and constructive comments.

Based on the reviewer comments we have added a section that focuses on PAM losses and artifacts, we have highlighted the role of ammonia in interpretation of our results and reduced the direct comparison of our results with the existing literature. We also re-handled the data using a new evaluation of SP-AMS collection efficiency and we added one figure to the supplementary section, discussing the mass size distributions of the three aerosol instruments and their differences. Furthermore, the manuscript was proof-read by a native English speaker and multiple corrections were made to the style and phrasing. Also, e.g., several new citations were made.

In this document, there are point-to-point answers to the reviewers. We have copied the reviewer comments with black text. *Our responses are in regular blue font and the changes made in the manuscript are marked with italic blue text.*

Attached, there is the revised version of our manuscript, the revised supplementary section and file where the made changes are marked with red cross-out or blue underlining.

On behalf of the authors,

Sincerely,

Jenni Alanen

## Anonymous Referee #1

The authors simulated the effects of atmospheric aging of exhaust emissions from a natural gas engine with a PAM chamber and investigated the volatility of fresh and aged particles using a thermodenuder. The authors show that the engine tested produced significant secondary particulate matter with respect to the primary emission and that composition and volatility of the secondary aerosol was influenced by engine/ catalyst temperatures. The authors present a clear motivation for their work and the article is generally well written. However, there are major issues, which should preclude publication at this stage, outlined as follows:

## Major comments

Scope of the paper: The authors are using a relatively new, hence unestablished, technique to investigate emissions from one engine during conditions not shown to be relevant to real world driving. They then use their results to suggest that “the shift from traditional liquid fuels to natural gas can have a decreasing effect on total particle pollution in the atmosphere”. They also do not quantify the ‘shift’ to which they refer. Given these obvious limitations, I do not feel that such strong statements on the effect of natural gas engines on the atmosphere are justified. I would suggest they remove them from the manuscript.

The Referee is right, the statement was too strong and the shift was not validated. The sentence has been removed. Also other statements on the effect of natural gas engines on the atmosphere have been modified or removed.

Wall effects and sampling artefacts: There are issues relating to the measurement of ammonia and ammonium nitrate. In the PAM, ammonium nitrate will form in the presence of NO<sub>x</sub> and ammonia. If sulfate is present, ammonium sulfate will form preferentially before ammonium nitrate. However ammonia is a very ‘sticky’ compound and difficult to measure see e.g. Suarez-Bertoa et al. It is thus clear that losses of gaseous ammonia and the walls of the sampling system and reactor will have a profound impact on the observed secondary inorganics, and potentially on subsequent experiments as the ammonia slowly desorbs. In turn, the effects observed in this paper may very well relate more to sampling conditions e.g. flow rates/ temperatures than to processes occurring in the atmosphere or in the engine. Ideally, the authors should determine how long it takes for ammonia concentrations reaching the PAM to match those emitted at the tailpipe and how long it takes for the PAM to become ammonia free after an experiment.

We don’t believe that the effects on ammonium and nitrate only relate to sampling conditions but to catalyst (or exhaust) temperature and engine operation resulting higher ammonia concentrations in the exhaust. We admit, however, that ammonia is difficult to measure, a fact which should be pointed out in the manuscript.

It was not possible to determine the time that it took the ammonia to saturate in the sampling system or PAM or the time it took to become ammonia free in a way the Referee desires. Ammonia measurements in the raw exhaust showed below detection limit of 2 ppm for all the stable engine operation modes that were tested. When clean compressed air was lead through the PAM with UV lights on, ammonium level – measured by SP-AMS – dropped to zero concentration in less than ten minutes. This, however, is not sufficient test to determine how long it takes for the PAM to become ammonia free after an experiment because of the lower relative humidity of the compressed air and because ammonia could exist in gaseous phase (we did not measure ammonia in diluted exhaust) and in particles below SP-AMS detection limit even if the SP-AMS did not detect it.

Following changes were made to the manuscript:

Page 12: *We note that because nitrate formation is limited by ammonium, the slow stabilization is probably related to ammonia.*

Page 14: *The measurement of ammonium nitrate and ammonium sulfate is difficult because ammonia sticks on the walls of sampling systems and instruments (Suarez-Bertoa et al., 2015; Heeb et al., 2012, 2008), which may result in wall losses or an artifact on subsequent measurements. The penetration of ammonia could not be calculated, but the measured ammonium concentrations varied clearly from one case to another, implicating that the source of the ammonia was indeed the exhaust line instead*

*of e.g., the walls of the PAM. However, longer times for stabilization of the SP-AMS concentration would have been advantageous for the reliability of ammonium, and as a consequence, nitrate particle formation.*

-- Meanwhile, ammonium nitrate has been shown to influence measurement of the CO<sub>2</sub><sup>+</sup> fragment in the AMS by Pieber et al. This influence on CO<sub>2</sub><sup>+</sup> is small, 0.4-10% of the nitrate mass, but is instrument dependent, and becomes larger when the error is propagated through the AMS fragmentation table to m/z 28 and so on. The O/C ratio is also affected. This may go part way to explaining the observed difference between the EEPs and AMS. Fortunately, this may be corrected for retrospectively using the CO<sub>2</sub><sup>+</sup> signal from the initial ammonium nitrate calibration, and is recommended for measurements such as these, with a high ammonium nitrate fraction.

We agree with the Referee that the influence of inorganic species on CO<sub>2</sub><sup>+</sup> signal is very important topic regarding AMS data analysis, especially in the case of laboratory engine emissions, and it was not mentioned in the manuscript. We investigated the impact of ammonium nitrate on CO<sub>2</sub><sup>+</sup> signal with the calibration performed in the laboratory after the measurement campaign. According to the calibration, nitrate to CO<sub>2</sub><sup>+</sup> resulted in a slope (b) of 0.016. Compared to the paper of Pieber et al. (2016) b in our instrument was in the lower end of the range of b values for 8 tested instruments (0.004-0.102, P10-P90). Roughly estimating from Figure 5 in Pieber et al. (2016) the impact of ammonium nitrate interference on O/C and H/C ratios was less than 5% in our data (with NO<sub>3</sub>/OA <0.85; O/C >0.7). Therefore, we decided that we don't apply a correction for Org, O/C or H/C data because of ammonium nitrate interference.

Following changes were made to the manuscript:

*Page 6: The impact of ammonium nitrate interference on CO<sub>2</sub><sup>+</sup>, O/C and H/C ratios was evaluated to be small, less than 5 % (Pieber et al., 2016). Therefore, a correction of ammonium nitrate interference was not applied for organics or O/C data.*

-- How do wall losses in the PAM effect the observed organic mass concentrations? This is of course not easy to answer, but some consideration of the effect of particle losses and vapour losses (organic/inorganic secondary precursors) is required.

Based on the model of Palm et al. (2016), which deals with the fate of condensable gases in an oxidation flow chamber, wall losses in the PAM were not substantial for condensable organic oxidation products or sulfuric acid. According to the model, the accelerated chemistry in the PAM was a more potential source of losses, but also those losses were small. Particle losses, measured by Karjalainen et al. (2016), were also considered. An exact calculation of particle losses is not possible because of new particle formation and particle growth in the PAM and the dependence of particle losses on particle size, but an estimation for particle losses was calculated.

A new chapter concerning particle and precursor losses was added in pages 13-14:

*The losses of condensable organic oxidation products and artifact effects of the accelerated chemistry in the PAM have been evaluated following the method of Palm et al. (2016) for the cases in Figure 2. HRLPI number size distributions were used to calculate the condensation sink needed in the loss calculation. Molar mass of 200 g mol<sup>-1</sup>, diffusion coefficient of 7\*10<sup>-6</sup> m<sup>2</sup> s<sup>-1</sup> (Tang et al., 2015) and rate constant for reaction with OH of 1\*10<sup>-11</sup> (Ziemann and Atkinson, 2012) were applied. For sticking coefficient selection  $\alpha = 1$  (assumed by Palm et al. 2016), the fraction of oxidation products condensed on particle phase was 0.94 ± 0.03, but for  $\alpha = 0.1$  the fraction of oxidation products condensed on particle phase was 0.64 ± 0.15.*

*The losses of sulfuric acid were also calculated in the same way. Diffusion coefficient of  $1 \cdot 10^{-5}$  (Hanson and Eisele, 2000),  $\alpha$  of 0.65 (Pöschl et al., 1998) and molar mass of  $98.079 \text{ g mol}^{-1}$  were used for sulfuric acid. The fraction of sulfuric acid that condensed on particle phase was  $0.98 \pm 0.01$ . According to Lambe et al. (2011),  $\text{SO}_2$  losses in the PAM are negligible. It can be concluded that the effect of precursor losses and artifacts in the PAM was not substantial in our measurements. The measurement of ammonium nitrate and ammonium sulfate is difficult because ammonia sticks on the walls of sampling systems and instruments (Suarez-Bertoa et al., 2015; Heeb et al., 2012, 2008), which may result in wall losses or an artifact on subsequent measurements. The penetration of ammonia could not be calculated, but the measured ammonium concentrations varied clearly from one case to another, implicating that the source of the ammonia was indeed the exhaust line instead of e.g., the walls of the PAM. However, longer times for stabilization of the SP-AMS concentration would have been advantageous for the reliability of ammonium, and as a consequence, nitrate particle formation.*

*Karjalainen et al. (2016) and Timonen et al. (2017) estimated the effect of particle losses in a similar PAM chamber to be small. The particle losses measured by Karjalainen et al. (2016) depend on particle size and are below 10% at the particle sizes with most particle mass. An exact calculation of the particle losses in the PAM chamber is not possible because the particle size and number increase while the aerosol sample flows through the chamber. An estimation for the particle mass losses in the chamber can be given, calculated using the average of HRLPI particle number size distributions before and after the chamber (similarly to the precursor-loss calculation by Palm et al., 2016) and the PAM particle loss curve. The particle mass loss according to this examination was  $20.3 \pm 3.7\%$ . Most probably, however, the actual particle mass losses in the chamber were smaller because majority of the mass actually was located at larger particle sizes that HRLPI is unable to measure, where particle losses are smaller.*

A comment on particle losses and their effect on the differences of the results of the instruments were also added:

*Page 12: Also, particle losses may play a role in the differences between instruments; particle losses in the PAM chamber were larger in the HRLPI size range than in the SP-AMS size range. Nevertheless, most probably, the largest role was played by the differences in instrument size ranges.*

#### Minor Comments

Pg 1 Ln 8: What does low or moderate mean in this context? It seems to contradict Pg 1 Ln 10: “particle mass measured downstream the PAM chamber, was 6-184 times as high as the mass of the emitted primary exhaust particles.” Presumably, the authors mean in absolute mass, but please clarify.

Yes, absolute mass was meant, compared with the values in the literature. Because of the referee comments received from both Referees, the sentence was modified to not give direct evaluation of the magnitude of the secondary aerosol formation potential. The ordering of the sentences in the abstract were also changed.

*Pg 1: The PAM chamber was used with a constant UV-light voltage, which resulted in relatively long equivalent atmospheric ages of 11 days at most. The studied retrofitted natural gas engine exhaust was observed to form secondary aerosol. The mass of the total aged particles, i.e., particle mass measured downstream of the PAM chamber, was 6-268 times as high as the mass of the emitted primary exhaust particles.*

Pg 1 Ln 20: This last statement is too strong given the limited scope of the study (See major comments).

The conclusion in the last sentence was softened and totally reformulated.

*Pg 1: According to the results of this study, the exhaust of a natural gas engine equipped with a catalyst forms secondary aerosol when the atmospheric ages in a PAM chamber are several days. The secondary aerosol matter has different physical characteristics from those of primary particulate emissions.*

Pg 2, introduction: The recent review of SOA from vehicles by Gentner et al. should be cited somewhere here.

The review was read and cited as requested. Also the study of Goyal and Sitharta was cited in the introduction section.

*Pg 2: In general, vehicles emit substantial fraction of anthropogenic precursors for SOA formation (Gentner et al., 2017), and the amount of potential SOA often exceeds the emissions of primary organic aerosol.*

*Pg 4: Goyal and Sidhartha (2003) recorded a notable improvement in the air quality of Delhi when a portion of vehicles were changed to natural gas vehicles in 2001.*

Pg 3 Ln 31: Jathar et al. found that SOA formation from raw LNG is higher than from gasoline. This result is relevant to this introduction and to the discussion sections of this work.

Unfortunately, we don't fully understand this comment. Jathar et al. did not study LNG but Fischer Tropsch from NG. Fischer-Tropsch from natural gas is a liquid fuel, and as such, not directly comparable with natural gas.

Pg 4 Ln 9: What was the remaining 3% of the fuel?

The natural gas properties have been described in more detail by Alanen et al. (2015): "The fuel used was Russian pipeline natural gas with high methane content. It contained 97.2 vol% methane, 1.37% ethane, 0.17% propane, 0.07% other hydrocarbons, 0.9% nitrogen and 0.2% carbon dioxide."

Following changes were made to the manuscript:

*Pg 4: The engine used was a retrofitted spark ignition natural gas engine using Russian pipeline natural gas as fuel. Methane content of the fuel was 97 %, other hydrocarbon content was 1.6 % and nitrogen content was 0.9 %. Sulfur content was below 1 ppm.*

Pg 4 Ln 11: How relevant are these engine conditions to real world driving?

The two operation modes simulated typical natural gas power plant operation with the retrofitted passenger car engine and thus did not directly represent real world driving.

The manuscript was slightly modified.

*Pg 4: A small (2.0 liter displacement) spark ignited passenger car engine was used for the measurements with Russian pipeline natural gas as fuel. The methane content of the fuel was 97 %, other hydrocarbon content was 1.6 % and nitrogen content was 0.9 %. The sulfur content was below 1 ppm. The engine was run at two steady-state engine operation modes with torque of 70 Nm and speed of 2700 rpm (Mode 1, 15 M1) and torque of 35 Nm and speed of 3100 rpm (Mode 2, M2). In engine mode 2, short chain hydrocarbons were added into the exhaust to make it resemble the exhaust of a power plant NG engine. The exhaust gas composition in two operation modes simulated typical natural gas power plant exhaust gas composition. The engine, natural gas and lubricating oil properties as well*

*as the engine operation modes have been described in more detail by Murtonen et al. (2016), Alanen et al. (2015) and Lehtoranta et al. (2016).*

Pg 4 Ln 26: Was the sampling system heated in any way? If not, how did this effect losses of secondary precursors?

The porous tube diluter (PTD) dilution air was heated to 30 °C in order to achieve constant dilution conditions. The PTD has been designed to perform without particle losses by radial entrainment of the dilution air (Ntziachristos et al. 2016; Mikkanen and Moisio 2001). The losses of secondary precursors in the PTD and the following residence time chamber have not been defined. They were similar in all the studied cases because the sampling setup was not changed.

Ntziachristos, L., Saukko, E., Lehtoranta, K., Rönkkö, T., Timonen, H., Simonen, P. and Karjalainen, P.: Particle emissions characterization from a medium-speed marine diesel engine with two fuels at different sampling conditions (2016), *Fuel*, 186, 456–465.

Following changes were made to the manuscript:

*Pg 5: For the particle measurement instruments, the sampling system consisted of a porous tube diluter (PTD, Mikkanen and Moisio 2001; Ntziachristos et al. 2004) with dilution ratio (DR) 6, followed by a residence time chamber with a residence time 6 s. The dilution air was heated to 30 °C in order to achieve constant dilution conditions. A second dilution stage was carried out with an ejector diluter (Dekati Ltd.) with DR 4.*

Pg 6 Ln 12: How was CO<sub>2</sub> gas interference at m/z 44 corrected for?

AMS CO<sub>2</sub> gas interference was corrected by using the measured CO<sub>2</sub> concentrations. One sentence was added to the manuscript.

*Pg 6: The CO<sub>2</sub> gas interference in the AMS data was corrected by using the CO<sub>2</sub> concentrations measured with Sick Maihak SIDOR gas analyzer.*

Pg 6 Ln 34: 'Representative' of what? What do the other cases look like? A figure similar to Figure 4 which shows 'non-representative' results should be shown in the SI.

The word choice was wrong. The cases cover all the tested exhaust temperatures and both engine operation modes. In the cases in Figure 2 we have measured good quality data with all the instruments for both primary emission and secondary aerosol formation potential.

Following changes were made to the manuscript:

*Pg 7: The cases (engine mode, catalyst, catalyst temperature) included in this paper cover all the tested exhaust temperatures and both engine operation modes and have data collected with all available instruments at both primary and total aged aerosol measurements.*

Pg 11 Ln 5: "With a decreasing catalyst temperature, the mass concentration and fraction of sulfate in total aged particles decreased (Fig. 4). This was expected; at lower catalyst temperatures, the oxidation of SO<sub>2</sub> to SO<sub>3</sub> decreases and less sulfuric acid (sulfates) can form (Arnold et al., 2012). The mass fraction of nitrate in secondary particles increased with a decreasing catalyst temperature. This could not be explained by catalyst performance improvement: gaseous NO<sub>x</sub> levels remained similar in all catalyst temperatures or rose with an increasing catalyst temperature (see Lehtoranta et al., 2016). Sulfate concentrations, however, could explain the behaviour of nitrate concentrations: If enough gaseous sulfuric acid is available, ammonium sulfate forms, and if not, more ammonium nitrate can form instead." How large was the decrease in sulfate (absolute mass) shown in Figure 4?

According to table 1 this decrease is small for the SP-AMS. In quantitative/ stoichiometric terms is the decrease in mass of sulfate sufficient to explain the increase in ammonium nitrate? If the change in sulfate mass is rather small, and since the authors are using catalysts with urea reduction, shown to result in increasing ammonia selectivity (vs. NO) at lower temperature, is it not more likely that an increase in ammonia emissions at low temperatures causes the observed effects?

Thank you for a very good comment. The interpretations in the quotations were clearly not justified. Ammonium had an effect on nitrate concentrations. In fact, nitrate concentration correlated well with ammonium ( $R^2=0.986$  among all the total aged cases). However, the explanation that ammonia emissions would have increased at lower temperatures is not necessarily supported by the NO<sub>x</sub> reduction data because the NO<sub>x</sub> emissions either did not depend on the catalyst temperature or decreased at lower temperatures.

The decrease in sulfate was 5-30 %, which was not large but in the same direction in all cases. In stoichiometric terms, in the M1, C1 case the decrease in sulfate mass could explain only 32% of the increase in nitrate. In this case, however, ammonium could not explain the increase either because the ammonium concentration decreased with increasing nitrate. By contrast, in the case M2, C1 the nitrate increase could be more than fully explained by sulfate decrease.

Even though the secondary inorganic aerosol concentrations were measured to be higher than in many previous studies, the ammonium concentrations after catalysts in raw exhaust were below instrument FTIR detection limit 2 ppm in all studied cases. Therefore, possibly even low ammonia slips from catalysts may have an effect on secondary aerosol formation.

The text was modified to include the significant role of ammonia on nitrate formation.

*Pg 12: The mass concentration of nitrate in secondary particles increased as the catalyst temperature decreased. This could not be explained by catalyst performance improvement: gaseous NO<sub>x</sub> levels remained similar at all catalyst temperatures or rose as catalyst temperature increased (see Lehtoranta et al., 2016). Because ammonia concentrations after catalyst were low, below 2 ppm in all cases, the effect of catalyst temperature on ammonia emission could not be measured. However, ammonium concentrations measured by SP-AMS correlated rather well with nitrate concentrations. Therefore, we suggest that ammonium increase was related to the nitrate increase. Also the sulfate concentrations could partly explain the behavior of the nitrate concentrations.*

Pg 11 Ln 22. Why was a collection efficiency of 0.5 used? This is clearly suspect given the discrepancy between EEPS and AMS. What, in quantitative terms, would be the time dependent collection efficiency using the parametrization by Middlebrook and how would this effect the magnitude of the SOA formation and SOA/POA ratios?

The time-dependent CE was calculated according to the parametrization by Middlebrook et al. (2012). The parametrization changed the total aged concentrations in Figure 2 only little – now the CE is 0.45 while in the first version of the manuscript it was 0.5. The latter terms of the equations [4] and [6] in the paper of Middlebrook et al. were on average 0.22-0.43, leading to composition-dependent collection efficiencies 0.45. In consequence, the choice of the default CE does not explain the discrepancy between EEPS and AMS. The usage of the time-dependent parametrization affected a little the SOA formation and the SOA/POA ratios. By contrast, the parametrization made significant changes in Figure 4 and in Table 3. All figures in the manuscript have now been re-calculated using the parametrization by Middlebrook. The most significant impact of the parametrization was on the evaporation temperatures of sulfate, which were decreased by about 20-40 °C.

Pg 12 Ln 1. The authors extrapolate from one natural gas engine to natural engines in general (see major comments).

Here we did not extrapolate from the NG engine tested in this paper to natural gas engines in general. Instead, we referred to the fact that natural gas engines emit less particle mass than engines fueled with conventional fuels (e.g. Pirjola et al. 2016, Anderson et al. 2015, Prati et al. 2011, Bielaczyc et al. 2014). The text was slightly modified.

Pirjola, L., Dittrich, A., Niemi, J.V., Saarikoski, S., Timonen, H., Kuuluvainen, H., Järvinen, A., Kousa, A., Rönkkö, T., Hillamo, R. Physical and Chemical Characterization of Real-World Particle Number and Mass Emissions from City Buses in Finland (2016) *Environmental Science and Technology*, 50 (1), pp. 294-304.

Anderson, M., Salo, K. and Fridell, E.: Particle- and Gaseous Emissions from an LNG Powered Ship (2015), *Environ. Sci. Technol.*, 49 (20), pp. 12568–12575.

Prati, M.V., Mariani, A., Torbati, R., Unich, A., Costagliola, M.A., Morrone, B. Emissions and Combustion Behavior of a Bi-Fuel Gasoline and Natural Gas Spark Ignition Engine (2011), *SAE International Journal of Fuels and Lubricants*, 4 (2), pp. 328-338.

Bielaczyc, P., Woodburn, J. and Szczotka, A.: An assessment of regulated emissions and CO<sub>2</sub> emissions from a European light-duty CNG-fueled vehicle in the context of Euro 6 emissions regulations (2014), *Appl. Energy*, 117, pp. 134–141.

*Pg 14: Natural gas engines emit very little particle mass, which can make them less harmful to human health than corresponding gasoline-, diesel- or marine-fuel-oil-fueled engines.*

## References

1 Suarez-Bertoa, R. et al. Intercomparison of real-time tailpipe ammonia measurements from vehicles tested over the new world-harmonized light-duty vehicle test cycle (WLTC). *Environmental Science and Pollution Research* 22, 7450-7460 (2015).

2 Pieber, S. et al. Inorganic Salt Interference on CO<sub>2</sub><sup>+</sup> in Aerodyne AMS and ACSM Organic Aerosol Composition Studies. *Environmental Science and Technology* 50, 10494–10503 (2016).

3 Gentner, D. R. et al. A review of urban secondary organic aerosol formation from gasoline and diesel motor vehicle emissions. *Environmental Science & Technology* (2016).

4 Jathar, S. H. et al. Secondary organic aerosol formation from photo-oxidation of unburned fuel: Experimental results and implications for aerosol formation from combustion emissions. *Environmental Science and Technology* 47, 12886-12893 (2013).

5 Heeb, N. V. et al. Three-way catalyst-induced formation of ammonia<sup>~</sup>Velocity- and acceleration-dependent emission factors. *Atmospheric Environment* 40, 5986-5997 (2006).

6 Middlebrook, A. M., Bahreini, R., Jimenez, J. L. & Canagaratna, M. R. Evaluation of composition-dependent collection efficiencies for the aerodyne aerosol mass spectrometer using field data. *Aerosol Science and Technology* 46, 258-271 (2012).



## Anonymous Referee #2

Alanen et al. studied the secondary particle formation potential from natural gas engine exhaust using a potential aerosol mass (or an oxidation flow) reactor and concluded that the secondary particle formation was (i) substantially higher than the primary aerosol emissions, (ii) dominated by organic compounds but had significant contributions from inorganic compounds, (iii) dependent on the catalyst type and temperature, and (iv) lower than the secondary particle formation observed for gasoline and diesel vehicles.

The manuscript provides strong motivation for the study and the instrument- and analysis-related methods employed for this study are adequate. My concern with the methods is the operation and use of the oxidation flow reactor (see major comment (1) below). The manuscript, for the most part, is well written and the results are robust. However, I am hesitant on accepting the manuscript for publication in its current form. I would like the authors to consider the following major and minor comments:

Major comments:

1. Operation and use of the oxidation flow reactor (OFR): I have two concerns surrounding the use of the PAM or the OFR. One, the authors have not examined the formation of secondary particles as a continuous function of the photochemical age, in contrast to previous studies. This is a problem because, as has been shown previously, secondary particle formation increases with photochemical age at low ages but eventually decreases (presumably from gas-phase fragmentation reactions and heterogeneous chemistry) at higher ages. Since the current study does not simulate this continuous evolution, it is unclear if the authors would have seen a pattern similar to that observed with other OFR studies. Do the authors have that data? Can the study be repeated at least for one of the engine load-catalyst conditions?

In its then state, the intensity of the PAM UV lights could not be varied or changed. For that reason, the authors do not have this data, although we agree with the Referee that it would have provided important information. Our study was, to our knowledge, the first one focusing on secondary aerosol formation from a natural gas engine and we observed that measurable amounts of secondary aerosol forms from NG engine exhaust in a PAM chamber. The research topic suggested by the Referee will be hopefully studied in the future.

-- More importantly, this creates the problem of comparing the data obtained in this study with other chamber and OFR studies (that have quantified secondary particle formation on at least a semi-continuous basis for photochemical age) and presents challenges in making conclusions about the natural gas engine (see next major comment below).

We removed the claims on the advantageousness of natural gas engine in comparison to other engines. The table 2 provides the reader in a short and clear form the information that the photochemical ages simulated in our study differ from many of the previous SOA articles. It also gives the reader an idea of the magnitude of SOA formation potential from engines in general. For that reason, we did not change or modify the representation of the table.

Second, the authors have not considered known artifacts of using an OFR related to the loss of vapors to the OFR walls and accelerated chemistry (Palm et al., 2016) and the short residence times and small condensation sinks (Jathar et al., 2017) in an OFR that might not allow the oxidation products to condense as secondary particles (since the natural gas engine produced very few primary particles, I

think this might be an important factor). All of these contribute to underestimating the secondary particle formation in OFRs, again affecting the comparison with chamber studies. A discussion of these effects and an attempt to correct for these effects will tell the authors if and how these artifacts could affect the results and conclusions. I would refer the authors to Palm et al. (2016) for methods to correct for these artifacts.

As requested, we used the model of Palm et al. (2016) to estimate the magnitude of wall losses and the significance of accelerated chemistry in the PAM. According to the model, the losses of condensable organic oxidation products were approximately 6 % (sticking coefficient  $\alpha = 1$ ) and losses of sulfuric acid were 2 %. Because the average particle size distribution of entering and exiting sample is used in the model, the effect of small condensation sink entering the PAM was not emphasized in the model, although we agree with the Referee that in applications with low primary particle concentration and size, such as a natural gas engine, small condensation sinks can hinder condensation of organic vapors in PAM. Because the modeled losses were low, SOA production factors or concentrations were not corrected for. A new chapter discussing the PAM losses and artifacts was added.

A new chapter concerning particle and precursor losses was added in pages 13-14:

*Organic precursor losses and artifact effects of the accelerated chemistry in the PAM have been evaluated following the method of Palm et al. (2016) for the cases in Figure 2. HRLPI number size distributions were used to calculate the condensation sink needed in the loss calculation. Molar mass of  $200 \text{ g mol}^{-1}$ , diffusion coefficient of  $7 \cdot 10^{-6} \text{ m}^2 \text{ s}^{-1}$  (Tang et al., 2015) and rate constant for reaction with OH of  $1 \cdot 10^{-11}$  (Ziemann and Atkinson, 2012) were applied. For sticking coefficient selection  $\alpha = 1$  (assumed by Palm et al. 2016), the precursor penetration was  $0.94 \pm 0.03$ , but for  $\alpha = 0.1$  the precursor penetration was  $0.64 \pm 0.15$ .*

*The losses of sulfuric acid were also calculated in the same way. Diffusion coefficient of  $1 \cdot 10^{-5}$  (Hanson and Eisele, 2000),  $\alpha$  of 0.65 (Pöschl et al., 1998) and molar mass of  $98.079 \text{ g mol}^{-1}$  were used for sulfuric acid. The penetration of sulfuric acid was  $0.98 \pm 0.01$ . According to Lambe et al. (2011), SO<sub>2</sub> losses in the PAM are negligible. It can be concluded that the effect of precursor losses and artifacts in the PAM was not substantial in our measurements. The measurement of ammonium nitrate and ammonium sulfate is difficult because ammonia sticks on the walls of sampling systems and instruments (Suarez-Bertoa et al., 2015; Heeb et al., 2012, 2008), which may result in wall losses or an artifact on subsequent measurements. The penetration of ammonia could not be calculated, but the measured ammonium concentrations varied clearly from one case to another, implicating that the source of the ammonia was indeed the exhaust line instead of e.g., the walls of the PAM. However, longer times for stabilization of the SP-AMS concentration would have been advantageous for the reliability of ammonium, and as a consequence, nitrate particle formation.*

*Karjalainen et al. (2016) and Timonen et al. (2017) estimated the effect of particle losses in a similar PAM chamber to be small. The particle losses measured by Karjalainen et al. (2016) depend on particle size and are below 10 % at the particle sizes with most particle mass. An exact calculation of the particle losses in the PAM chamber is not possible because the particle size and number increase while the aerosol sample flows through the chamber. An upper limit for the particle losses in the chamber can be given, calculated using the average of HRLPI particle number size distributions before and after the chamber (similarly to the precursor-loss calculation by Palm et al., 2016) and the PAM particle loss curve. The particle loss according to this examination was  $20.3 \pm 3.7 \%$ . Most probably, however, the actual particle losses in the chamber were smaller because majority of the mass actually was located at larger particle sizes that HRLPI is unable to measure, where particle losses are smaller.*

-- In addition, a brief discussion of the pitfalls in using the OFR (e.g., accelerated chemistry leading to multiple reaction steps in the gas-phase) and particularly its comparison to chamber data would be helpful.

A short discussion was added, mentioning different fates/losses and advantages/disadvantages in comparison to chamber studies.

Pg 13:

### **3.4 PAM artifacts and losses**

*So called smog chambers are an established method of measuring SOA formation. An oxidation flow chamber such as PAM provides some advantages in comparison to smog chambers, such as higher degree of oxidation, smaller physical size and a short residence time, which allows measurements with higher time resolution. Smog chamber walls may cause also large wall losses and influence the chemistry in the chamber (Bruns et al., 2015). On the other hand, smog chambers may simulate atmospheric oxidation of organic precursors better than oxidation flow chambers due to their more tropospheric oxidant concentrations and longer residence times (Lambe et al., 2011).*

*PAM method has been designed to produce the maximum potential aerosol mass from precursor gases (Kang et al., 2007). In that stage, the oxidation products of precursors have condensed to particle phase and formed secondary aerosol. However, because the oxidant concentrations are unrealistically high in PAM, the UV light intensity used is non-tropospheric and the residence times are much shorter than in atmosphere (e.g., Simonen et al., 2017), precursor oxidation products have also other possible fates; they can be oxidized too far and form non-condensable oxidation products before condensation (accelerated chemistry) and they can exit the reactor before the condensation occurs. Also, precursor oxidation products can be lost on the PAM walls although the losses on the walls are minimized by the chamber design (Lambe et al., 2011). These other fates than condensing on particle phase are viewed here as PAM artifacts and losses.*

2. Comparison with earlier studies: Based on the above comment, I have a few questions that center around the conclusions of this study: (i) can the results of this study at high photochemical ages (several days) be compared to chamber studies of gasoline and diesel vehicles performed over several hours of photochemistry (in my opinion, probably not)?

See reply 2 (iii).

(ii) how would the OFR artifact corrections change the comparison described in Table 2 (the Table could also add recent measurements made by Jathar et al., 2017 for diesel engines)?

Artifact corrections would change the comparison in Table 2 only little, since the SOA precursor losses were small, based on the model of Palm et al. (2016).

The recent article by Jathar et al. (2017) was referred, as well as a recent article by Timonen et al. (2017).

(iii) how confident are the authors in claiming that the secondary particle production from natural gas engines is quite small compared to gasoline and diesel engines, especially in urban areas where photochemical ages are low (0.5-1.5 days).

In this version of the manuscript, we try not to directly compare the secondary particle production of our engine directly to literature with low photochemical ages, but to give the reader an idea of the magnitude, the SOA formation potentials reported in literature are mentioned. The differences of the

photochemical ages are highlighted every time any implication of a comparison is made. The tunnel study of Tkacik et al. (2014) had similar oxidation method and similar photochemical ages as we tested. Therefore, in our opinion, a more direct comparison to that article could be done.

A few sentences stating the advantageousness of natural gas engines were removed and the text around table 2 was defined.

*Pg 9: Table 2 also contains SOA production factors of secondary organic aerosol for different diesel and gasoline vehicles obtained from the literature. Although the total aged particulate matter production of the investigated NG engine was much larger than its primary particle emissions, it was smaller than SOA production from in-use diesel and gasoline vehicles in the literature (Tkacik et al., 2014). The SOA formation potential from the NG engine, measured by SP-AMS, was similar to that of a diesel vehicle equipped with a catalytic converter or to that of a hot start gasoline vehicle. On the other hand, the photochemical age that was simulated by a chamber in the different studies varied greatly. This is why the comparison of the SOA production factors should be done very carefully, if at all. The longest atmospheric ages in the literature collected in Table 2 were achieved in our study.*

*Pg 15: To estimate the quantity of the NG engine exhaust's SOA formation potential, it was on the same level as or lower than the SOA formation potential of a diesel vehicle equipped with an oxidation catalyst or that of warm (hot start) gasoline vehicles. However, the photochemical age that was produced by the PAM chamber in our study was longer (several days) than the photochemical ages achieved in the previous studies (several hours). Therefore, the SOA formation potential must not be directly compared.*

(ii) how relevant are the high photochemical age results in this study to the atmosphere given that there are other processes (e.g., transport, deposition) that are relevant at the same time scale?

The purpose of the potential aerosol mass (PAM) chamber method is to try to achieve the maximum potential formation of secondary aerosol mass. Unfortunately, presumably, the maximum was not quite achieved for example because of the losses in the oxidation flow reactor and because we could not adjust the achieved photochemical age in the chamber. This, however, was the aim of the study. Deposition and transport are important processes when the effects of emissions are evaluated. However, the evaluation of those processes was not the aim of this study, but instead the aim was to evaluate the maximum potential of natural gas engine exhaust to form secondary aerosol mass.

The photochemical ages that were simulated by the PAM chamber were 4-11 days. The tropospheric lifetimes of many aerosol species has been evaluated to be of the same time scale (IPCC 2013). We admit that shorter photochemical ages would have been also relevant to the atmosphere and because of transportation, shorter photochemical ages would have been more relevant to highly populated areas. However, this does not mean that the age of approximately one week is irrelevant.

IPCC (2013), Climate Change 2013: The Physical Science Basis, Cambridge Univ. Press, Cambridge, UK.

The operation of the OFR and the artifacts linked to the OFR do not allow for definitive answers to any of the above questions. This fact needs to be considered for the summary/conclusions from this work.

A sentence stating this fact was added.

*Pg 15: Also, despite the attempts to model PAM related losses and artifacts and to estimate particle losses in PAM, the measurements performed with PAM still involve uncertainties.*

3. Style and phrasing: The writing, while detailed, needs to be paid more attention and the style and phrasing need to be improved throughout the manuscript. Here are just a few examples: (i) Page 11,

line 30: 'Although' instead of 'However, although', (ii) Page 11, line 8: 'remained similar at all catalyst temperatures' instead of 'remained similar in all catalyst temperatures', (iii) Page 10, line 29: 'waited' instead of 'was waited', (iv) Page 7, line 6: 'condense' instead of 'condensate'.

The mentioned examples were corrected. In addition, the manuscript was proof-read by a native speaker. As a result, numerous small improvements in the style and phrasing were made in the manuscript, practically in every page.

Minor comments:

1. Page 2, line 27: Is there a reference for the comment on diesel vehicles? Also, can this comment be made for other combustion/energy sources?

The sentence was modified to better serve its purpose. The comment on diesel vehicles referred to the particulate number regulation that concerns diesel vehicles (nowadays also gasoline vehicles) and is considered as more stringent than the particulate mass regulation.

*Pg 2: Particle number and mass emission regulations for passenger cars and heavy-duty engines have substantially decreased the primary particle emissions from vehicles (e.g., May et al., 2014; Johnson, 2009). Secondary particle precursor emissions or secondary aerosol formation potential are not directly regulated, but some of the current emission regulations affect secondary particle precursor emissions indirectly. For instance, oxidative catalysts reduce the total hydrocarbon emissions and thus probably the emissions of secondary organic aerosol precursors; simultaneously, they also change the oxidation state of inorganic compounds. Furthermore, the mandatory national targets of 10 % biofuel in gasoline in EU may have decreased the SOA formation in the atmosphere (Timonen et al., 2017).*

2. Page 2, line 30: May be use the word 'oxidative catalyst' to refer to the aftertreatment device?

Corrected as requested.

*Pg 2: For instance, oxidative catalysts reduce the total hydrocarbon emissions and thus probably the emissions of secondary organic aerosol precursors; simultaneously, they also change the oxidation state of inorganic compounds.*

Page 3, line 4: Is there a newer reference instead of Weitkamp for the last sentence? Examples: Gordon et al., 2014 or Jathar et al., 2017.

Also Gordon et al and Jathar et al were referred to and the sentence was slightly modified.

*Pg 3: From diesel vehicles without a particle filter, the SOA mass formation potential is of the same magnitude as or lower than the primary particle mass emission (Jathar et al., 2017; Gordon et al., 2014b; Weitkamp et al., 2007).*

4. Page 4, lines 9-14: It would help if there was a brief mention of the size, horsepower, typical application, on- or off-road characteristics for the natural gas engine used.

The first sentence was modified to mention that the engine was a gasoline passenger car engine that was retrofitted to run with natural gas.

*Pg 4: The engine was a retrofitted passenger car spark ignition engine using Russian pipeline natural gas as fuel.*

*Pg 4: The two operation modes simulated typical natural gas power plant operation with the retrofitted passenger car engine and thus did not directly represent real-world driving.*

5. Page 4, lines 15-24: What is the rationale for using two different aftertreatment configurations and the different temperatures? Is it based on the drive cycle expected for these engines? It is likely this fact is hidden in some of the earlier literature by the group but it would be beneficial to mention it here.

Catalyst performance depends on the temperature of the catalyst or of the exhaust that flows through it. In our measurement, behavior of the catalysts in lower and higher temperatures were tested in order to define the effects of changing exhaust temperature on emissions and to find the best operation conditions for the tested catalysts. Regarding this paper, especially the effect of catalyst temperature on the formation and characteristics of primary and total aged particulate matter could be studied.

*Pg 4: Catalyst performance depends on the exhaust temperature (e.g. Lehtoranta et al., 2016). By using the catalysts at different temperatures, the effect of catalyst temperature on the formation and characteristics of primary and total aged particulate matter could be studied.*

6. Page 5, lines 9-29: This is a novel application of the MCM to determine photochemical exposure given that exhaust reactivity can significantly suppress OH exposure. Peng et al. (2015) and Li et al. (2015) have developed empirical relationships to calculate OH exposure based on the mixture reactivity, residence time, and humidity in OFRs. Can the authors comment on why the method of Peng+Li was not used to calculate OH exposure? Or in other words, is there reason to believe that the MCM offers better predictions? Has the MCM output been evaluated against OH exposure measurements for an OFR application?

The model by Peng+Li was not available and a similar model offered by PAM User Manual uses Euler method and is not very precise. Furthermore, the model is not flexible and lacks the possibility to add reactions. The combination of MCM and KPP offers a flexible method with good solver options for modeling gas-phase chemistry. MCM is widely used and proven to work. The free parameters of the model were obtained using SO<sub>2</sub> measurements. The predicted OH exposures agree well with those derived from SO<sub>2</sub> reduction in PAM chamber.

*Pg 5: The model has been tested against SO<sub>2</sub> reduction measurements in the PAM chamber.*

7. Page 5, lines 30-34: I am not sure I understand how the RH in the PAM chamber was as high as 80% when the clean dilution air (which was dry or 30%) accounted for 24 parts by volume to the exhaust. The mass balance on the water vapor does not seem to work out. The only way to explain the result is that water vapor is being generated in the PAM?

The dilution ratio prior to PAM was only 6. (*"The PAM chamber was placed between the two dilution stages"*). That is why the high RH was possible. The dilution air was dry. To clarify the sampling and dilution system, the Instrumentation and data analysis chapter, first paragraph was slightly modified.

*For the particle measurement instruments, the sampling system consisted of a porous tube diluter (PTD, Mikkanen and Moisio 2001; Ntziachristos et al. 2004 with dilution ratio (DR) 6, followed by a residence time chamber with a residence time 6 s. The dilution air was heated to 30 ° C in order to achieve constant dilution conditions. A second dilution stage was carried out with an ejector diluter (Dekati Ltd.) with DR 4.*

8. Page 6, lines 27-31: Subtraction of primary particle mass needs to be done when presenting the secondary particle production factors. For instance, SOA emission factors in Table 2.

In fact, in Table 2 this was already done. This has been mentioned in the text: “To be able to compare the SOA production factors, here primary organic aerosol has been subtracted from the total aged organic aerosol.” To prevent confusion, the mention was added also in the caption of the Table 2 and in the first paragraph of chapter 3.1.

Table 2: Primary organic aerosol has been subtracted from the total aged organic aerosol.

Pg 7: To enable the comparison to literature, an exception is made when presenting secondary particle production factors.

Do the authors know of the recent work of Link et al. (2017) where they examined photochemical production of inorganic compounds from light-duty vehicle exhaust? That might be another study to incorporate within the inorganic particle production discussion.

The following insertions or modifications were made in the results and conclusions sections.

Pg 8: Link et al. (2017) found that even high NO<sub>x</sub> emissions can produce negligible amounts of secondary nitrate aerosol if related ammonia emissions are small. Because secondary ammonium nitrate aerosol formation is limited by ammonia, its formation is probably more related to the exhaust after-treatment than the fuel. The exact ammonia concentrations in the raw exhaust cannot be given because they were below the instrument detection limit 2 ppm. According to these measurements, also low ammonia emissions may have atmospheric importance as secondary inorganic aerosol precursors.

Pg 15: Therefore, what limits the nitrate mass in particles is most likely the availability of ammonia which is more related to the exhaust after-treatment than fuel or combustion process.

9. Page 7, lines 17-21: Long sentences beginning with ‘It is possible’ and ending with ‘into the atmosphere’. Consider breaking into multiple sentences.

The sentences were slightly modified in order to make them more readable.

Pg 8: It is possible that if the catalyst conditions are favorable, the particulate matter that would otherwise condense on particles in PAM chamber condenses on particle phase already in the cooling and dilution process. I.e. if the catalyst sufficiently oxidizes the exhaust gases thus lowering their saturation vapor pressure, they condense or nucleate already when released from the tailpipe and not later on in the atmosphere.

10. Page 8, lines 14-18: Why isn’t the standard calculation of EF based on the CO<sub>2</sub> concentrations and carbon intensity of the fuel, employed in this work?

Thank you for pointing this out. A small mistake was spotted because of the comment. The calculation actually was performed correspondingly to the “standard calculation” of emission factor in unit mg kg<sup>-1</sup><sub>fuel</sub>. The carbon intensity, calculated from fuel composition, was 0.74 kg<sub>C</sub> kg<sub>fuel</sub><sup>-1</sup>. The equation used by e.g. Gordon et al. (2014) can be reformulated as follows: [P] stands for the concentration of particles, C<sub>f</sub> stands for carbon content of the fuel and x<sub>CO<sub>2</sub></sub> for the molar fraction of CO<sub>2</sub>.

$$EF = \frac{[P]}{[CO_2]} \frac{M_{CO_2}}{M_C} C_f = \frac{[P]}{x_{CO_2}} \frac{RT}{pM_{CO_2}} EF_{CO_2}$$

Calculated from the fuel composition information, the EF<sub>CO<sub>2</sub></sub> was 2730 g<sub>CO<sub>2</sub></sub> kg<sup>-1</sup><sub>fuel</sub>. However, mistakenly, EF<sub>CO<sub>2</sub></sub> 2540 g<sub>CO<sub>2</sub></sub> kg<sup>-1</sup><sub>fuel</sub> was used previously (Huss et al. 2013). Now, the calculated EF<sub>CO<sub>2</sub></sub> 2730 g<sub>CO<sub>2</sub></sub> kg<sup>-1</sup><sub>fuel</sub> has been applied e.g. in the figures in Table 2. The procedure of emission factor calculation is now described in more detail in the text.

Huss, A.; Maas, H.; Hass, H. Well-to-wheels analysis of future automotive fuels and powertrains in the European context. Tank-To- Wheels (TTW) Report Version 4.0, July 2013. <http://iet.jrc.ec.europa.eu/about-jec>.

Gordon, T. D., Presto, A. A., Nguyen, N. T., Robertson, W. H., Na, K., Sahay, K. N., Zhang, M., Maddox, C., Rieger, P., Chattopadhyay, S., Maldonado, H., Maricq, M. M. and Robinson, A. L.: Secondary organic aerosol production from diesel vehicle exhaust: Impact of aftertreatment, fuel chemistry and driving cycle, *Atmos. Chem. Phys.*, 14(9), 4643–4659, doi:10.5194/acp-14-4643-2014, 2014.

*Pg 7: Emission factors were calculated from fuel composition and engine performance information. Residual O<sub>2</sub> in exhaust was 6.2-6.3 %, the power of the engine was 12 kW and 20 kW and the combustion air flow into the engine were approximately 100 and 115 kg h<sup>-1</sup> at the engine modes 1 and 2, respectively. Calculated from the fuel composition information, the emission factor for CO<sub>2</sub> EF<sub>CO<sub>2</sub></sub> was 2730 g kg<sub>fuel</sub><sup>-1</sup> and carbon intensity 0.74 kg<sub>C</sub> kg<sub>fuel</sub><sup>-1</sup>*

*Pg 9: Emission factors or secondary aerosol production factors in different units can be calculated from the presented particle mass concentrations with use of following factors. If a unit factor mg kg<sup>-1</sup> fuel is needed, a factor of ca. 22 m<sup>3</sup> kg<sup>-1</sup> fuel can be applied to multiply the particle concentration (Calculation e.g. in Jathar et al., 2017; Gordon et al., 2014b). In order to obtain emission and production factors in unit kWh<sup>-1</sup>, a factor 2.7 m<sup>3</sup> kWh<sup>-1</sup> (Mode 1) or 4 m<sup>3</sup> kWh<sup>-1</sup> (Mode 2) can be similarly used. These factors are derived from the fuel composition and engine performance information provided in Sect. 2.1 and 2.2, and exhaust CO<sub>2</sub> concentration.*

11. Page 9, line 21: While I understand what the authors mean, ‘oxidated alpha-pinene particles’ is not correct.

Corrected in form:

*Pg 10: An et al. (2007) measured the volatility of secondary organic aerosol produced during alpha-pinene photo oxidation --*

12. Figure 2: The pie charts are too small. Please consider increasing them in size. Will the plots a, c, and d benefit from being in emission factor units?

The size of the pie charts has now been increased. In our opinion, the plots 2a, 2c and 2d do not benefit from being in emission factor units. The values in the plots can be easily transformed to emission factor units by a reader, if needed, by using the factors that are given in the text. We also believe that for many readers, concentrations are more intuitive and understandable than emission factors.

13. Figures 5 and 6: Do the EEPS and HRLPI size distributions compare well with the AMS size distributions? Can the EEPS, HRLPI, and the AMS data be combined to provide a more complete picture of the size- and composition-resolved emission/production of particles?

The instruments measure different size ranges, as seen in the figure below. The two instruments that measure the aerodynamic diameter of the particles seem to compare quite well with each other between 47-124 nm in a loglog plot but in the two lower right-hand-side plots there is a difference between the concentrations. EEPS particle size mode is always below 80 nm whereas both HRLPI and SP-AMS imply that the mass size distribution peak lies well above 100 nm. This is at least partly due to the different measurement principle of EEPS. Both instruments HRLPI and EEPS miss the second peak above 300 nm and SP-AMS cannot give any information on the particles with diameter below about 40 nm. The figure below has now been added in the supplementary in case the future readers have the same question in mind. A modification in the manuscript was also done.



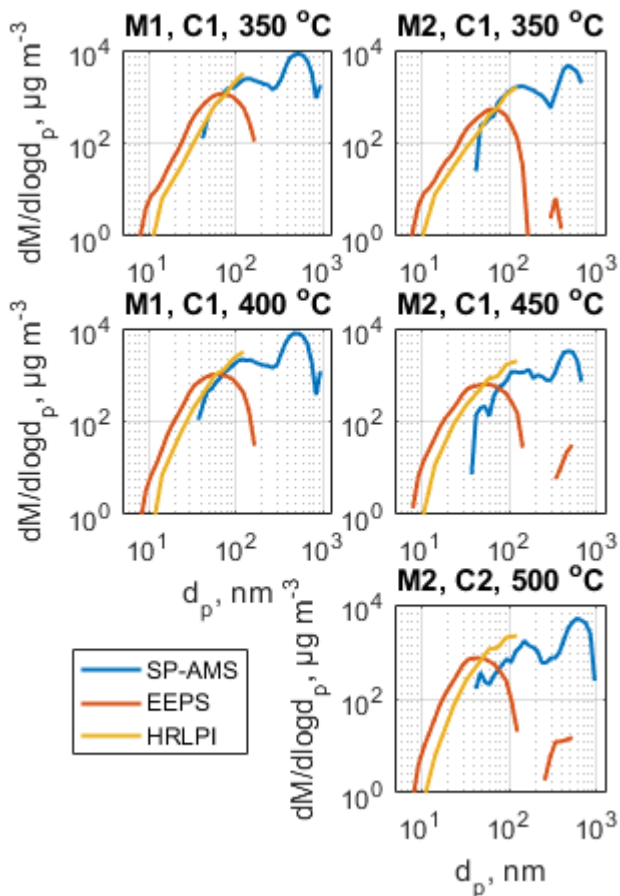

Figure S3 Mass size distributions measured by SP-AMS (sum of the size distributions of organics, sulfate, nitrate and ammonium), EEPS and HRLPI. Note: on the x-axis there is aerodynamic particle diameter for HRLPI, vacuum aerodynamic diameter for SP-AMS and mobility diameter for EEPS.

Pg 13: The mode with smaller particle size was dominated by organics.

Pg 13: The best overall picture of is therefore gained with a combination of SP-AMS and HRLPI. See supplement for a comparison of the size distributions measured by different instruments in a same figure. The two instruments that measure the aerodynamic diameter of the particles (HRLPI and SP-AMS) compare quite well with each other in the size range 47-124 nm.

Pg 13: EEPS also underestimated the mass of particles with diameter above 200 nm (see supplement).

14. Can the authors speculate on the species in the exhaust and photochemical mechanisms that can explain the secondary organic particle production?

The origin of the SOA was speculated only as follows: “The source of the secondary organic aerosol could be either the natural gas or the lubricating oil. We, however, are not able to tell the source based on these measurements.”

This was added:

Pg 8: The fuel mainly consisted of light hydrocarbons that are unable to form secondary organic aerosol (e.g., Seinfeld and Pandis, 2016, pp. 575). Also the sulfur content of the fuel was very low. For example, Thiruvengadam et al. (2014); Eichler et al. (2017) have suspected engine lubricating oil to be responsible for large portion of engine emitted particles. Therefore, we believe that lubricating oil is a potential candidate for the source of secondary aerosol.

# Comparison of primary and secondary particle formation from natural gas engine exhaust and of their volatility characteristics

Jenni Alanen<sup>1</sup>, Pauli Simonen<sup>1</sup>, Sanna Saarikoski<sup>2</sup>, Hilikka Timonen<sup>2</sup>, Oskari Kangasniemi<sup>1</sup>, Erkka Saukko<sup>1</sup>, Risto Hillamo<sup>2</sup>, Kati Lehtoranta<sup>3</sup>, Timo Murtonen<sup>3</sup>, Hannu Vesala<sup>3</sup>, Jorma Keskinen<sup>1</sup>, and Topi Rönkkö<sup>1</sup>

<sup>1</sup>Aerosol Physics, Faculty of Natural Sciences, Tampere University of Technology, P.O. Box 692, 33101 Tampere, Finland

<sup>2</sup>Atmospheric Composition Research, Finnish Meteorological Institute, P.O. Box 503, 00101 Helsinki, Finland

<sup>3</sup>VTT Technical Research Centre of Finland Ltd., P.O. Box 1000, 02044 VTT, Espoo, Finland

*Correspondence to:* Topi Rönkkö (topi.ronkko@tut.fi)

**Abstract.** Natural gas usage in traffic and energy production sector is a growing trend worldwide; thus, an assessment of its effects on air quality, human health and climate is required. Engine exhaust is a source of primary particulate emissions and secondary aerosol precursors, which both contribute to air quality and can cause adverse health effects. Technologies, such as cleaner engines or fuels, that produce less primary and secondary aerosol could potentially significantly decrease atmospheric particle concentrations and their adverse effects. In this study, we used a potential aerosol mass (PAM) chamber to investigate the secondary aerosol formation potential of natural gas engine exhaust. The PAM chamber was used with a constant UV-light voltage, which resulted in relatively long equivalent atmospheric ages of 11 days at most. The studied retrofitted natural gas engine exhaust was observed to form secondary aerosol. The mass of the total aged particles, i.e., particle mass measured downstream of the PAM chamber, was 6-268 times as high as the mass of the emitted primary exhaust particles. The secondary organic aerosol (SOA) formation potential was measured to be 8-18 mg kg<sub>fuel</sub><sup>-1</sup>. The total aged particles mainly consisted of organic matter, nitrate, sulfate and ammonium, with the fractions depending on exhaust after-treatment and the engine parameters used. Also the volatility, composition and concentration of the total aged particles were found to depend on the engine operating mode, catalyst temperature and catalyst type. For example, a high catalyst temperature promoted the formation of sulfate particles, whereas a low catalyst temperature promoted nitrate formation. However, in particular, the concentration of nitrate needed a long time to stabilize — more than half an hour — which complicated the conclusions but also indicates the sensitivity of nitrate measurements on experimental parameters such as emission source and system temperatures. Sulfate was measured to have the highest evaporation temperature, and nitrate had the lowest. The evaporation temperature of ammonium depended on the fractions of nitrate and sulfate in the particles. The average volatility of the total aged particles was measured to be lower than that of primary particles, indicating better stability of the aged natural gas engine emitted aerosol in the atmosphere. According to the results of this study, the exhaust of a natural gas engine equipped with a catalyst forms secondary aerosol when the atmospheric ages in a PAM chamber are several days. The secondary aerosol matter has different physical characteristics from those of primary particulate emissions.

## 1 Introduction

Primary aerosol particles are directly emitted into the atmosphere by various anthropogenic sources, such as vehicles, engines and power plants, and biogenic sources. Secondary aerosol particle mass forms as a consequence of the atmospheric oxidation of emitted precursor gases. In this process, the saturation vapor pressure of the organic and inorganic gases becomes lower, thus allowing them to transfer into particle phase through condensation and nucleation (Hallquist et al., 2009; Murphy et al., 2014). In addition to biogenic sources, also traffic and other anthropogenic sources contribute to secondary aerosol formation (Kanakidou et al., 2005).

Fine particles ( $<2.5 \mu\text{m}$ ) are found to cause adverse health effects and premature mortality in people (Dockery and Pope III, 1994; Lelieveld et al., 2015). The relative contribution of primary and secondary particles on these health effects is still unknown, but there are indications that secondary particles can be even more hazardous than primary particles (Künzi et al., 2015; McWhinney et al., 2011; Rager et al., 2011). Therefore, both primary and secondary particle emissions must be taken into consideration when evaluating the health effects of particle emissions.

Aerosols play an important role in the climate as well. Fine particles in the atmosphere affect the radiative balance of the atmosphere by either warming or cooling it, depending on their properties (Myhre et al., 2013); however, large uncertainties remain regarding the contribution of particles to climate change and its prevention. Clouds also contribute to the atmosphere's radiative balance. Aging of an aerosol can lead to increased hygroscopicity of the particles (Kanakidou et al., 2005) and a higher likelihood that they act as cloud condensation nuclei. The preservation and lifetime of the particles in the atmosphere partly define how large their impact is on the climate.

The formation process of secondary inorganic aerosol can be modeled rather accurately because the number of different inorganic precursors is small and their oxidation reactions are well known. Secondary organic aerosol (SOA) is a more complex subject area due to the vast number of different organic compounds, their potential reactions and the still unknown participation of all compounds in secondary aerosol formation (Hallquist et al., 2013; Jimenez et al., 2009). SOA has been a hot topic in aerosol science during the past decade (Huang et al., 2014; Robinson et al., 2007; Virtanen et al., 2010), but there are still many open questions in considering, for example, the SOA formation from vehicle emissions (Gentner et al., 2017). Also the relative fractions of secondary organic and inorganic aerosol from various emission sources still need to be studied. Both secondary organic and secondary inorganic aerosol can contribute significantly to air quality deterioration (Huang et al., 2014).

Particle number and mass emission regulations for passenger cars and heavy-duty engines have substantially decreased the primary particle emissions from vehicles (e.g., May et al., 2014; Johnson, 2009). Secondary particle precursor emissions or secondary aerosol formation potential are not directly regulated, but some of the current emission regulations affect secondary particle precursor emissions indirectly. For instance, oxidative catalysts reduce the total hydrocarbon emissions and thus probably the emissions of secondary organic aerosol precursors; simultaneously, they also change the oxidation state of inorganic compounds. Furthermore, the mandatory national targets of 10 % biofuel (ethanol) in gasoline in EU may have decreased the SOA formation in the atmosphere (Timonen et al., 2017). In general, vehicles emit a substantial fraction of anthropogenic precursors for SOA formation (Gentner et al., 2017), and the amount of potential SOA often exceeds the emissions of primary

organic aerosol. For instance, gasoline vehicles emit 9-15 times or even two orders of magnitude higher secondary organic particulate matter than primary organic particle mass (Karjalainen et al., 2016; Nordin et al., 2013; Platt et al., 2013; Tkacik et al., 2014). Indeed, Bahreini et al. (2012) found that secondary organic aerosol originating from gasoline engines forms the majority of the SOA in and downwind of large metropolitan areas. From diesel vehicles without a particle filter, the SOA mass formation potential is of the same magnitude as or lower than the primary particle mass emission (Jathar et al., 2017; Gordon et al., 2014b; Weitkamp et al., 2007).

Exhaust after-treatment can reduce secondary aerosol formation potential from engine exhaust, especially SOA formation potential. In general, diesel fuel has the strongest secondary organic aerosol formation potential amongst diesel, jet fuel, gasoline and Fischer-Tropsch from natural gas and coal (Jathar et al., 2013). However, diesel vehicles equipped with oxidation catalysts or catalytic particle filters have been reported to be minor secondary particle emitters (Chirico et al., 2010; Gordon et al., 2014b; Samy and Zielinska, 2010). In gasoline engine functioning exhaust after-treatment can also clearly reduce secondary particle formation (Karjalainen et al., 2016). The secondary aerosol precursor emissions of engines and vehicles are also strongly dependent on the driving conditions, which should be taken into account in emission comparisons.

For instance, Tkacik et al. (2014) showed that the secondary inorganic mass often exceeds the amount of the secondary organic aerosol in a highway tunnel, even by a factor of two. The main contributor to secondary inorganic aerosol in their study was ammonium nitrate, which originates from  $\text{NO}_x$  and ammonia emissions. According to Karjalainen et al. (2016), large fractions of nitrate in the secondary inorganic particles are characteristic for highway driving, and the inorganic species concentrations are relatively low when compared to the secondary organic aerosol formed during other parts of the New European Driving Cycle (NEDC), which they tested. Idling is another engine operation mode that can produce significant amounts of secondary inorganic aerosol from gasoline vehicle exhaust (Nordin et al., 2013).

Natural gas usage as a fuel in combustion engines, both in energy production and traffic, is a growing trend worldwide. Natural gas engines emit little primary particle mass and less  $\text{CO}_2$  than engines fueled with conventional fuels (Anderson et al., 2015; Bielaczyc et al., 2014) but their particle number emission can be significant (Hallquist et al., 2013; Jayaratne et al., 2010). In addition, the size of the majority of the particles emitted by natural gas engines can be below the detection limits of traditional exhaust particle measurement devices (Alanen et al., 2015). Natural gas engine exhaust particles are highly volatile (Bullock and Olfert, 2014; Jayaratne et al., 2012) or they can consist of volatile matter condensed on non-volatile cores (Alanen et al., 2015; Graves et al., 2015; Pirjola et al., 2016). The evaporation of the particles is largest at temperatures below  $100^\circ\text{C}$  (Alanen et al., 2015; Jayaratne et al., 2012). Primary particles from natural gas engines mainly consist of organic matter (Pirjola et al., 2016), but the composition depends on exhaust after-treatment (Lehtoranta et al., 2016). In the study of Lehtoranta et al. (2016), high catalyst temperatures were found to increase the fraction of sulfate in particles when a combination of oxidative and reductive catalysts was employed. Also, increased ammonium concentrations were found in particles at high catalyst temperatures.

To the authors' knowledge, there are no published studies on secondary particle formation from natural gas engine emissions, its chemical or physical properties or the effect of exhaust after-treatment on exhaust's secondary particle formation. Goyal and Sidhartha (2003) recorded a notable improvement in the air quality of Delhi when a portion of vehicles were changed

to natural gas vehicles in 2001. In our study, the secondary aerosol formation potential of natural gas engine exhaust was investigated using a flow-through reactor, and the chemical and physical characteristics of particles were investigated by aerosol instruments. The results were compared to those of primary particle emissions, but because the primary particle emissions of the same engine have already been discussed in two earlier publications (Alanen et al., 2015; Lehtoranta et al., 2016), they are not a focus of this paper. In general, the aim of this study is to report the total particulate emissions of natural gas engines, i.e., primary and secondary particles, to ensure that shifting to natural gas from diesel and gasoline will not cause unexpected environmental or health issues, and to define the possible benefits of the shift. Volatility studies on both primary and secondary particles enabled an evaluation of the stability and residence time of the particles in the atmosphere. The study of chemical composition can help solve their origin and find ways to reduce the particulate emissions.

## 10 2 Methods

### 2.1 Engine and after-treatment

A small (2.0 liter displacement) spark ignited passenger car engine was used for the measurements with Russian pipeline natural gas as fuel. The methane content of the fuel was 97 %, other hydrocarbon content was 1.6 % and nitrogen content was 0.9 %. The sulfur content was below 1 ppm. The engine was run at two steady-state engine operation modes with torque of 70 Nm and speed of 2700 rpm (Mode 1, M1) and torque of 35 Nm and speed of 3100 rpm (Mode 2, M2). In engine mode 2, short chain hydrocarbons were added into the exhaust to make it resemble the exhaust of a power plant NG engine. The exhaust gas composition in two operation modes simulated typical natural gas power plant exhaust gas composition. The engine, natural gas and lubricating oil properties as well as the engine operation modes have been described in more detail by Murtonen et al. (2016), Alanen et al. (2015) and Lehtoranta et al. (2016).

Two separate after-treatment systems were applied in the measurements, both consisting of a reductive and an oxidative section. The after-treatment has been described in more detail by Lehtoranta et al. (2016). The first catalyst (Catalyst 1, C1) consisted of only one reactor, which targeted both oxidation of carbon compounds and  $\text{NO}_x$  reduction through urea injection in the same catalyst reactor. The second catalyst system (Catalyst 2, C2) consisted of a palladium and platinum containing methane oxidation catalyst followed by urea injection and a vanadium-SCR catalyst, which catalysts were supported on metallic honeycomb substrates. Catalyst 1 was used in three different exhaust temperatures in the range of 350-450 °C in order to study its performance and its influence on secondary particle formation potential of the engine exhaust. The temperature of the catalyst 2 was 500 °C. Catalyst performance depends on the exhaust temperature (e.g., Lehtoranta et al., 2016). By using the catalysts at different temperatures, effects of catalyst temperature on the formation and characteristics of primary and total aged particulate matter could be studied. The catalyst temperatures were measured upstream of the oxidation catalysts. The temperature prior to the SCR of catalyst 2 was approximately 50 °C lower than prior to the oxidation catalyst. The exhaust flow through the catalysts was kept constant at 80 kg h<sup>-1</sup> by leading only a part of the exhaust gas flow through them (Murtonen et al., 2016).

## 2.2 Instrumentation and data analysis

The sampling system or the particle measurement instruments consisted of a porous tube diluter (PTD, Mikkanen and Moisio 2001; Ntziachristos et al. 2004) with a dilution ratio (DR) of 6, followed by a residence time chamber with a residence time of 6 s. The dilution air was heated to 30 °C to achieve constant dilution conditions. A second dilution stage was carried out with an ejector diluter (Dekati Ltd.) with DR 4. The dilution ratio over the PTD was adjusted using a bypass flow mass flow controller placed downstream the residence time chamber (Fig. 1). The dilution ratios were calculated from CO<sub>2</sub> concentrations in the raw and diluted exhaust samples and they could be used to calculate tailpipe concentrations of particle emissions. The aerosol sampling was done downstream the exhaust after-treatment system.

A potential aerosol mass chamber (Kang et al., 2007, 2011; Lambe et al., 2011, 2015) was used to simulate the aging process of an aerosol in the atmosphere. In the PAM, an oxidative environment (O<sub>3</sub>, OH and HO<sub>2</sub>, UV-light) was produced using two UV lamps emitting 185 nm and 254 nm radiation, respectively, in a small (13 l) flow-through chamber. The PAM chamber was placed between the two dilution stages, and the flow through it was a constant 5 liters per minute (residence time 156 s), measured by a bubble flow meter (Gilibrator, Sensidyne Inc.) and adjusted by a pressure regulator of the compressed air flow to the ejector diluter. The PAM chamber could be either bypassed or used to measure the properties of primary and secondary aerosols, respectively.

The approximate atmospheric age, i.e., the photochemical age simulated by the PAM chamber UV lights, was modeled using the properties of the PAM chamber and the measured concentrations of gaseous components that cause external OH reactivity in the chamber. The model used for calculating the OH exposures was based on the degradation mechanism extracted from the Master Chemical Mechanism or MCM v3.3.1 (Jenkin et al., 1997, 2003; Saunders et al., 2003) via the website <http://mcm.leeds.ac.uk/MCM> and translated to Matlab code using Kinetic PreProcessor or KPP (Damian et al., 2002). The model has been tested against SO<sub>2</sub> reduction measurements in the PAM chamber.

MCM is a near-explicit chemical mechanism that describes the atmospheric degradation of volatile organic compounds in gas phase. MCM describes the degradation of a given VOC through different generations of products until CO<sub>2</sub> is ultimately formed. It contains about 17000 reactions for 6700 different species. (Jenkin et al., 1997, 2003; Saunders et al., 2003). To be able to use these mechanisms with the PAM chamber, the photolysis rates have been calculated for ultraviolet light with wavelengths of 185 nm and 254 nm. The absorption cross section and quantum yield values needed for this are IUPAC recommendations (Atkinson et al., 2007) supplemented with the JPL data evaluation number 18 (Burkholder et al., 2015), when necessary. Some photolysis reactions relevant that are relevant to the PAM chamber but missing from the tropospheric MCM schemes have also been added.

KPP is a software tool for translating kinetic chemical mechanisms into Fortran77, Fortran90, C or Matlab simulation code. The generated code produces concentrations of each species present as a function of time (Damian et al., 2002). For the model used, the KPP source code was modified to fix certain conflicts involving the MCM mechanism and the photolysis rate calculations written for the PAM chamber as well as to allow large chemical schemes typical to MCM.

In this paper, we describe the PAM OH exposure as photochemical age, which is the equivalent time in the atmosphere in which the sample would reach the same OH exposure as in the PAM chamber. Thus,

$$\text{Photochemical age (days)} = \frac{\text{OH exposure}}{1.5 * 10^6 \text{ molec. cm}^{-3}} \frac{1}{3600 \text{ h}^{-1} \text{s} * 24 \text{ d}^{-1} \text{h}}, \quad (1)$$

where  $1.5 * 10^6 \text{ molec. cm}^{-3}$  is the average OH concentration in the atmosphere (Mao et al., 2009).

5 Relative humidity (RH) was measured downstream of the PAM chamber. The RH was high, about 80 %, due to the low primary dilution ratio that was applied during the experiments. The high RH of the sample complicated the evaluation of the PAM background mass levels — i.e., the particulate mass that was generated by only compressed air and UV lights — because the high RH could not be reproduced in the compressed air by the available instrumentation. The background levels were measured using both dry compressed air and compressed air with RH ~30 %.

10  $\text{NO}_x$  concentration was measured with a chemiluminescence detector (CLD), CO and  $\text{CO}_2$  concentrations in raw exhaust were measured with a non-dispersive infrared (NDIR) analyzer and  $\text{CO}_2$  concentrations in diluted exhaust were measured with a Sick Maihak SIDOR gas analyzer. Water, methane,  $\text{NH}_3$ , H<sub>2</sub>CO and the ratio of NO and  $\text{NO}_2$  were measured with a Fourier transform infrared spectroscopy (FTIR, Gasetm Cr-2000) analyzer, and methane, ethane, propane and ethylene were measured with a gas chromatograph (GC).

15 Aerosol instruments covered a large range of particle mobility and aerodynamic size as well as measurements of the particles' chemical composition. An engine exhaust particle sizer (EEPS, TSI Inc., Mirme 1994) and a high-resolution low-pressure impactor (HRLPI, Arffman et al. 2014) were employed, both on one-second time resolution, to measure the particle number, mass and size. The EEPS measures the size distribution and concentration of particles with a mobility diameter of 5.6-560 nm, and the HRLPI measures the aerodynamic size distribution of particles with diameter of ~5-200 nm. The mass of the particles  
20 was calculated under assumptions of unit density and spherical particles. EEPS default inversion was applied.

A soot particle aerosol mass spectrometer (SP-AMS, Aerodyne Research Inc., US) — a combination of a high-resolution time-of-flight aerosol mass spectrometer and a single particle soot photometer (Droplet Measurement Technologies) — was used to measure the chemical composition and oxidative state of the aerosol sample. The SP-AMS measures both refractory and non-refractory particulate matter. It operated in V-mode with a one-minute time resolution, measuring half of the time in  
25 mass spectra (MS) mode and the other half in particle size (pToF) mode. Both laser and tungsten vaporizers were used. The collection efficiency applied in the calculations was calculated using the parametrization by Middlebrook et al. (2012). The  $\text{CO}_2$  gas interference in the AMS data was corrected by using the  $\text{CO}_2$  concentrations measured with Sick Maihak SIDOR gas analyzer. The impact of ammonium nitrate interference on  $\text{CO}_2^+$ , O/C and H/C ratios was evaluated to be small (less than 5 % for O/C and H/C; Pieber et al. 2016). Therefore, a correction of ammonium nitrate interference was not applied for organics or  
30 O/C data.

Volatility measurements were made with a thermodenuder described in the publication by Heikkilä et al. (2009). When the remaining mass of particles was measured as a function of TD temperature, the thermodenuder was heated up to 265 °C and

then switched off, with the sample flow still flowing through it. The decreasing temperature was recorded for at least half an hour until the temperature was below 50 °C.

Emission factors were calculated from fuel composition and engine performance information. Residual O<sub>2</sub> in the exhaust was 6.2-6.3 %, the power of the engine was 12 kW and 20 kW and the combustion air flow into the engine was approximately 100 and 115 kg h<sup>-1</sup> in engine modes 1 and 2, respectively. Calculated from the fuel composition information, the emission factor for CO<sub>2</sub> EF<sub>CO<sub>2</sub></sub> was 2730 g kg<sub>fuel</sub><sup>-1</sup>, and the carbon intensity was 0.74 kg<sub>C</sub> kg<sub>fuel</sub><sup>-1</sup>.

### 3 Results and discussion

#### 3.1 Secondary particle formation and chemical composition

The concept “total aged” here comprises all particle mass measured downstream of the PAM chamber, i.e., both primary and secondary particle mass. In general, primary particle mass has not been subtracted from the mass measured downstream of the PAM (total aged) to calculate the secondary particle mass separately because doing so would have created inconsistency in representation of the results, since, for example, particle size distributions or volatility behavior cannot be presented in this way. For the same reasons, the PAM background mass — i.e., the particle mass generated in the PAM chamber from clean compressed air — has not been subtracted but is instead presented separately in the supplementary section of this paper. To enable a comparison to literature, an exception is made when presenting secondary particle production factors.

Figure 2 contains particulate mass measurement results derived from the three aerosol instruments. The chemical compositions from SP-AMS are also presented. The cases (engine mode, catalyst and catalyst temperature) included in this paper cover all of the tested exhaust temperatures and both engine operation modes, and they have data collected with all available instruments of both the primary and total aged aerosol measurements. In most cases in our measurements, primary exhaust particle mass concentrations from the natural gas engine were close to the detection limits of the instruments EEPS, HRLPI and SP-AMS (Alanen et al., 2015; Lehtoranta et al., 2016). Exceptions were made by the high temperature catalyst cases (M2, C2, 500 °C and M2, C1, 450 °C) during which more primary particle mass was formed, especially on the size ranges of the HRLPI and EEPS: a high catalyst temperature favors the conversion of SO<sub>2</sub> into SO<sub>3</sub> and further into sulfuric acid, which can nucleate and condense on existing particles in the sampling process or when released into the atmosphere (see, e.g., Arnold et al., 2012; Rönkkö et al., 2013). The primary particle formation phenomena and concentrations have been discussed in more detail in Lehtoranta et al. (2016) while this paper focuses on secondary aerosol formation and the total aged particle emissions.

The formed secondary particle mass concentrations were found to be significantly high in comparison with the primary particle mass emissions. In all of the investigated cases, particle mass increased when the sample was led through the PAM chamber. The increase in mass could be magnitudes larger than the primary particle mass emission (Table 1). The relative increase in mass in the PAM chamber could not be specified for all of the HRLPI measurements because of the very low primary particle mass. The total aged aerosol mass produced by natural gas engine exhaust was 0.99-2.6 mg m<sup>-3</sup> according to SP-AMS, leading to secondary mass production of 0.96-2.5 mg m<sup>-3</sup>.



The secondary aerosol formation — i.e., the ratio of the total aged particulate mass to the primary particulate mass — was lower in the cases that already produced more primary particle mass, i.e., in the cases with a high catalyst temperature. It is possible that if the catalyst conditions are favorable, the particulate matter that would otherwise condense on particles in the PAM chamber condenses on particle phase already in the cooling and dilution process. In other words, if the catalyst sufficiently oxidizes the exhaust gases, thus lowering their saturation vapor pressure, they condense or nucleate already when released from the tailpipe and not later on in the atmosphere. A high catalyst temperature promoted larger total aged aerosol formation, according to the EEPs and HRLPI measurements. However, the total aged mass concentrations of the SP-AMS did not increase as catalyst temperature increased. The differences in instrument's showings are discussed in Sect. 3.3. Also, the variation in the atmospheric ages increases uncertainty in the comparison of the catalyst temperature on secondary aerosol formation potential.

The total aged aerosol of the natural gas engine exhaust consisted of both organic and inorganic matter at the tested operating conditions (Fig. 2, Table 1). Approximately half of the total aged aerosol particle mass detected by SP-AMS consisted of organic matter. The fraction of sulfate and nitrate was measured to be 34-49 % in total, with their ratio depending on the case, and the fraction of ammonium varied between 10-15 %. Link et al. (2017) found that even high  $\text{NO}_x$  emissions can produce negligible amounts of secondary nitrate aerosol if related ammonia emissions are small. Because secondary ammonium nitrate aerosol formation is limited by ammonia, its formation is probably more related to the exhaust after-treatment than the fuel. The exact ammonia concentrations in the raw exhaust cannot be given because they were below the instrument detection limit 2 ppm. According to these measurements, also low ammonia emissions may have atmospheric importance as secondary inorganic aerosol precursors.

The organic fraction of the total aged aerosol consisted of hydrocarbon fragments ( $\text{C}_x\text{H}_y$ ), fragments with one oxygen atom ( $\text{C}_x\text{H}_y\text{O}$ ) and fragments with more than one oxygen atom ( $\text{C}_x\text{H}_y\text{O}_{z,z>1}$ ); there was little or no  $\text{C}_x\text{H}_y\text{N}$  fragments (hydrocarbons with nitrogen) in the total aged particles. The main secondary organic ions detected by the SP-AMS were  $\text{CO}_2^+$ ,  $\text{CHO}^+$  and  $\text{C}_2\text{H}_3\text{O}^+$ . The composition of the organic aerosol was similar in all of the cases: the  $\text{C}_x\text{H}_y\text{O}_{z,z>1}$  group was the largest, followed by  $\text{C}_x\text{H}_y$  and  $\text{C}_x\text{H}_y\text{O}$ . The source of the secondary organic aerosol could be either the natural gas or the lubricating oil. However, we are not able to tell the source based on these measurements. The fuel mainly consisted of light hydrocarbons that are unable to form secondary organic aerosol (e.g., Seinfeld and Pandis, 2016, pp. 575). For example, Thiruvengadam et al. (2014); Eichler et al. (2017) have suspected engine lubricating oil to be responsible for a large portion of engine emitted particles. Therefore, we believe that also lubricating oil is a potential candidate for the source of secondary aerosol.

The O/C ratios of the total aged aerosol measured by SP-AMS were between 0.9 and 1.2. The O/C ratio of the primary aerosol in the case with the largest concentration was slightly smaller (1.1) than the O/C ratio of the total aged aerosol in the same case (M2, C2, 500 °C). In all of the other primary aerosol measurements, the particle mass concentrations in the sample were too low for O/C ratio analysis. In comparison with a secondary aerosol emission study on gasoline engines by Karjalainen et al. (2016), the observed O/C ratios in the total aged aerosol from the PAM chamber were rather high.

The emission factors or secondary aerosol production factors in different units can be calculated from the presented particle mass concentrations by using the following factors. If a unit factor  $\text{mg kg}_{\text{fuel}}^{-1}$  is needed, a factor of ca.  $22 \text{ m}^3 \text{ kg}_{\text{fuel}}^{-1}$  can be applied to multiply the particle concentration (Calculation e.g. in Jathar et al., 2017; Gordon et al., 2014b). In order to obtain emission and production factors in unit  $\text{kWh}^{-1}$ , a factor  $2.7 \text{ m}^3 \text{ kWh}^{-1}$  (Mode 1) or  $4 \text{ m}^3 \text{ kWh}^{-1}$  (Mode 2) can similarly be used. These factors are derived from the fuel composition and engine performance information provided in Sect. 2.1 and 2.2 and the exhaust  $\text{CO}_2$  concentration.

The production factors of secondary organic aerosol have been calculated and collected in Table 2, in unit  $\text{kg}_{\text{fuel}}^{-1}$ . To be able to compare the SOA production factors, here primary organic aerosol was subtracted from the total aged organic aerosol. Table 2 also contains SOA production factors of secondary organic aerosol for different diesel and gasoline vehicles obtained from the literature. Although the total aged particulate matter production of the investigated NG engine was much larger than its primary particle emissions, it was smaller than SOA production from in-use diesel and gasoline vehicles in the literature (Tkacik et al., 2014). The SOA formation potential from the NG engine, measured by SP-AMS, was similar to that of a diesel vehicle equipped with a catalytic converter or to that of a hot start gasoline vehicle. On the other hand, the photochemical age that was simulated by a chamber in the different studies varied greatly. This is why the comparison of the SOA production factors should be done very carefully, if at all. The longest atmospheric ages in the literature collected in Table 2 were achieved in our study.

Palm et al. (2016); Tkacik et al. (2014); Kang et al. (2011) have seen with an oxidation flow reactor — such as the PAM chamber in our experiments — the highest potential secondary organic aerosol formation takes place at photochemical age of a few days and starts decreasing after that. For example, in the vehicle fleet emission study in a highway tunnel of Tkacik et al. (2014), the peak secondary aerosol production took place after 4-10 days of equivalent atmospheric oxidation ( $[\text{OH}] = 1.5 \cdot 10^6 \text{ molec. cm}^{-3}$ ), and larger OH exposures started to reduce the secondary mass. In our study, the simulated atmospheric, or photochemical, ages in the investigated cases varied between 4.6 and 10.7 days, depending on the external OH reactivity, which was affected by the concentrations of gaseous emissions (Table 1) entering the PAM chamber and by the relative humidity of the sample. The largest total aged particle concentrations were achieved with the longest atmospheric ages and the lowest particle concentrations were achieved with the shortest atmospheric ages. However, the secondary aerosol formation potential may have also been affected by the engine parameters and not only the achieved photochemical age: the total aged particle concentrations were the highest in engine operation mode 2 (M2).

### 3.2 Volatility of primary and secondary particle mass

The volatility of the particles was studied with a thermodenuder. Mass fraction remaining (MFR) stands for the fraction of the particle mass at a given thermodenuder temperature and the particle mass at room temperature. In Fig. 3, the particle mass fraction remaining has been calculated for two representative cases of primary emissions and four representative cases of total aged particle emissions, selected from among the cases already introduced. Figure 3 only shows data from EEPs, since the curves obtained from HRLPI were similar. Here, the curves have been smoothed by a moving average but the original one-second-resolution figure can be found in the supplementary section. For the total aged emissions, the cases with both higher

and lower catalyst temperature are presented. For primary particle emissions, only the case with the higher catalyst temperature is presented. This is because an accurate examination of the volatility of primary particles in low catalyst temperatures could not be done, due to the insufficient primary particle mass concentrations for high-quality analysis. In the figure, the “starting point”, i.e. the temperature where the mass fraction remaining is one, is 50 °C and not lower because of the decelerated cooling of the thermodenuder toward the room temperature and related time limitations.

The MFR curves for each type of particles are characteristic, i.e., each particle type can easily be distinguished by their evaporation behavior. To highlight this, the primary particle evaporation is marked with black, and the total aged particle evaporation curves are marked with cyan and blue in Fig. 3. The volatility of the particles from the natural gas engine clearly changed when the particles were aged. At high catalyst temperature, the primary particles (black triangles in Fig. 3) were more volatile than the total aged particles (cyan squares). Approximately half (46-60 % in EEPS, 43-53 % in HRLPI) of the total aged particle mass remained at a thermodenuder temperature of 250 °C, whereas only 5-10 % (1-4 % in HRLPI) of the primary particle mass remained at that temperature. Also the catalyst temperature had an impact on the volatility of the total aged particles (blue vs. cyan). An easily evaporable fraction of the total aged particles was formed in the case of a low catalyst temperature, which evaporated below 110 °C. Because of this easily evaporable fraction, the MFR of total aged particles at 250 °C was 30 % in the low catalyst temperature cases, while in the high catalyst temperature cases the MFR of total aged particles at 250 °C was 46-60 %.

The thermodenuder used in this study has been designed to minimize nanoparticle losses by reducing the residence time (Heikkilä et al., 2009). For example, in this study, the residence time in the heated zone of the thermodenuder was less than one second. An et al. (2007) measured the volatility of secondary organic aerosol produced during  $\alpha$ -pinene photo-oxidation and observed that only half of the secondary particle mass evaporates in a thermodenuder (100 °C) if the residence times in the heated zone of the thermodenuder are less than a few seconds. With longer residence times, the remaining mass downstream of the thermodenuder decreases to less than three percent. This means that the remaining fraction of particle mass in our study could have been smaller with longer residence times in the thermodenuder. On the other hand, a longer residence time in the thermodenuder would have increased the nanoparticle losses. In this study, with the use of a thermodenuder, we could observe the volatility differences between the different types of particle emissions emitted by a natural gas engine.

In Fig. 4 the remaining mass fractions are plotted for different chemical species of the particles drawn from the SP-AMS. In the primary emission case, approximately one third of the particle mass — consisting mainly of organics — remained at TD temperature of 250 °C. The low concentrations and particle size below the detection limit of SP-AMS degrade the analysis in the case M2, C1, 450 °C, which was seen as a fluctuating signal. About 25 % of the total aged particle mass in the high catalyst temperature cases and less than 10 % of the total aged particle mass in low catalyst temperature cases remained at 250 °C, according to SP-AMS. The remaining particle matter consisted of organics, sulfate and ammonium, in this order.

The composition information reveals that the high-volatility fraction of the total aged particles in the low temperature catalyst cases consisted of nitrates, possibly of ammonium nitrate, and high-volatility organics. The primary particle sulfate evaporated at thermodenuder temperatures between 100-170 °C, and the total aged particle sulfate evaporated more gradually above 120 °C. In all types of particles, the evaporation of organics was steady and gradual below 200 °C, indicating various organic

compounds with different evaporation temperatures. Above 200 °C, the evaporation of organics decreased. This combined SP-AMS and EEPS/HRLPI derived thermodenuder temperature ramp information can be used in future measurements for particle composition analysis: The evaporation temperature of the particles can give valuable information about the composition of the particles also without an access to SP-AMS.

5 The temperatures at which 50 % of the volatile fraction of the chemical compounds of the particles were remaining are collected in Table 3. The case “Primary, M2, C1, 450 °C” had particle mass concentrations that were too low (See Fig. 4) for this kind of examination. The evaporation temperatures of sulfate and nitrate were the highest and the lowest, respectively, in all of the analyzed cases (all catalyst temperatures; primary and total aged particles). Similarly to Huffman et al. (2009), who measured ambient aerosol volatility in megacities with a thermodenuder and an SP-AMS, we found that nitrate had the highest  
10 volatility and sulfate had the lowest.

Robinson et al. (2007) and Huffman et al. (2009) proposed that all organic aerosol should be considered semivolatile. Our results on primary and PAM chamber generated organic aerosols point in that direction as well. The evaporation temperature of the volatile fraction ( $T_{\text{volatile, 50 \%}}$ ) of organic matter lay between the  $T_{\text{volatile, 50 \%}}$  of nitrate and sulfate in all cases. Also, a significant fraction of the mass concentration of the organic matter did not evaporate. More exact specifications of the volatility  
15 cannot be given, but there is room left for speculation if part of the organic matter in secondary particles is SV-SOA or LV-SOA (Murphy et al., 2014).

The ammonium in total aged particles evaporated at higher thermodenuder temperatures when the catalyst temperature was high. The theory that the sulfate-nitrate trade-off phenomenon that determines the formation of nitrates is ammonium-bound is supported by the evaporation temperatures of ammonium. Ammonium evaporated at approximately 20 °C higher  
20 thermodenuder temperatures in the high catalyst temperature cases (Table 3); thus, its evaporation temperature was closer to the evaporation temperature of sulfate when the sulfate concentration of the particles was larger. By contrast, in the low catalyst temperature cases where the nitrate concentration was higher, the evaporation temperature of ammonium was closer to that of nitrate.

The nitrate concentrations measured during the thermodenuder temperature ramp (Fig. 4) in low thermodenuder tempera-  
25 tures differed from the nitrate concentrations that were measured without a thermodenuder (Fig. 2 a+b) in total aged particles. A possible explanation is that a long time is needed for the nitrate concentration to stabilize. In our measurement protocol, we waited 10-15 minutes after switching the PAM UV-lights on, followed by a 10-minute steady-state measurement with the aerosol instruments. After this, a thermodenuder ramp was started, which took approximately 45 minutes. Based on the results, the 10-15-minute wait was insufficient if accurate nitrate concentrations were desired. Therefore, the chemical compound mea-  
30 surements performed at low thermodenuder temperature can give a truer picture of the secondary aerosol formation than the measurements presented in Fig. 2. The change in concentrations between the steady-state measurements and the thermodenuder ramp measurements was the largest for nitrate, but the concentrations of other compounds also differed slightly from each other. Because the nitrate concentrations were found to be the slowest to stabilize and the most sensitive to changes in the system, such as to changes in temperature, special attention should be given to measurements of nitrate, especially when a

PAM chamber is being used. We note that because nitrate formation is limited by ammonium, the slow stabilization is probably related to ammonia.

According to our thermodenuder temperature ramp experiments, the catalyst temperature affected the total aged particle composition. With a decreasing catalyst temperature, the mass concentration and fraction of sulfate in total aged particles decreased (Fig. 4, Table 1). This was expected: at lower catalyst temperatures the oxidation of  $\text{SO}_2$  to  $\text{SO}_3$  decreases and less sulfuric acid (sulfates) can form (Arnold et al., 2012). The mass concentration of nitrate in secondary particles increased as the catalyst temperature decreased. This could not be explained by catalyst performance improvement: gaseous  $\text{NO}_x$  levels remained similar at all catalyst temperatures or rose as catalyst temperature increased (see Lehtoranta et al., 2016). Because ammonia concentrations after catalyst were low, below 2 ppm in all cases, the effect of catalyst temperature on ammonia emission could not be measured. However, ammonium concentrations measured by SP-AMS correlated rather well with nitrate concentrations. Therefore, we suggest that ammonium increase was related to the nitrate increase. Also the sulfate concentrations could partly explain the behavior of the nitrate concentrations. If enough gaseous sulfuric acid is available, ammonium sulfate forms, and if not, more ammonium nitrate can form instead. Similar behavior of nitrate and sulfate trade-off has been measured by Ntziachristos et al. (2016) for two different marine fuels, namely heavy fuel oil (HFO) and light fuel oil (LFO).

### 15 3.3 Differences between instruments and mass size distributions

Slightly unexpectedly, the total aged particle mass measured by SP-AMS was 2-4 times larger than the total mass measured by EEPS and 1-3 times larger than that measured by HRLPI (Fig. 2). There could be several reasons for this. In EEPS and HRLPI, unit density and spherical particles were assumed in the mass calculations. Natural gas engine primary particles have a density of  $0.85 \text{ g cm}^{-3}$  (Bullock and Olfert, 2014), but the densities of natural gas engine secondary particles can be larger than the unit density. For example, the density of ammonium nitrate, ammonium sulfate and sulfuric acid is approximately 1.5, 1.5 and  $1.8 \text{ g m}^{-3}$ , respectively (Clegg and Wexler, 2011). Particle density does not completely explain the difference in instrument readings. Also, the collection efficiency (CE) estimation used in SP-AMS calculation is probably not the reason for the differences between the instrument results in this study. Evaluation of the CE following the procedure of Middlebrook et al. (2012) revealed that  $\text{CE} = 0.45$  was the correct value for the studied total aged particles in the cases in Figure 1.

25 However, the detection efficiency and size range varied among the aerosol instruments (EEPS 5.6-560 nm, HRLPI ~5-200 nm, SP-AMS ~30-1000 nm) and can explain the differences in results; HRLPI can detect a larger fraction of the primary particles than SP-AMS because of the more suitable size range of the instrument and, correspondingly, SP-AMS can detect a larger fraction of the total aged particles formed in the PAM chamber because of its more suitable size range. Also, particle losses may play a role in the differences between instruments; particle losses in the PAM chamber were larger in the HRLPI size range than in the SP-AMS size range. Nevertheless, most probably, the largest role was played by the differences in instrument size ranges.

Mass size distributions of EEPS and HRLPI are plotted in Fig. 5. HRLPI suggests that a part of the particle mass lies above the instrument size range, which was confirmed by SP-AMS mass size distributions in Fig. 6. According to SP-AMS, the mass size distributions of total aged particles were bimodal, with the size of the larger mode being 480-840 nm and the smaller being

150-200 nm. The mode with smaller particle size was dominated by organics. Although the mass concentration of the total aged particles was better recorded by SP-AMS, a portion of the particles on the smallest particle sizes was missed due to the lower limit of SP-AMS size range at 30-50 nm. The best overall picture of is therefore gained with a combination of SP-AMS and HRLPI. See supplement for a comparison of the size distributions measured by different instruments in a same figure. The two instruments that measure the aerodynamic diameter of the particles (HRLPI and SP-AMS) compare quite well with each other in the size range 47-124 nm.

We can also see a difference between the EEPS and HRLPI mass size distributions. The difference is probably due to the inversion of EEPS, which forces the size distributions to follow a log-normal shape. EEPS also underestimated the mass of particles with diameter above 200 nm (see supplement). The different measurement principles of the instruments must also be kept in mind. EEPS measures the mobility size and HRLPI measures the aerodynamic size of the particles.

### 3.4 PAM artifacts and losses

So called smog chambers are an established method of measuring SOA formation. An oxidation flow chamber such as PAM provides some advantages in comparison to smog chambers, such as higher degree of oxidation, smaller physical size and a short residence time, which allows measurements with higher time resolution. Smog chamber walls may cause also large wall losses and influence the chemistry in the chamber (Bruns et al., 2015). On the other hand, smog chambers may simulate atmospheric oxidation of organic precursors better than oxidation flow chambers due to their more tropospheric oxidant concentrations and longer residence times (Lambe et al., 2011).

PAM method has been designed to produce the maximum potential aerosol mass from precursor gases (Kang et al., 2007). In that stage, the oxidation products of precursors have condensed to particle phase and formed secondary aerosol. However, because the oxidant concentrations are unrealistically high in PAM, the UV light intensity used is non-tropospheric and the residence times are much shorter than in atmosphere (e.g., Simonen et al., 2017), precursor oxidation products have also other possible fates; they can be oxidized too far and form non-condensable oxidation products before condensation (accelerated chemistry) and they can exit the reactor before the condensation occurs. Also, precursor oxidation products can be lost on the PAM walls although the losses on the walls are minimized by the chamber design (Lambe et al., 2011). These other fates than condensing on particle phase are viewed here as PAM artifacts and losses.

The losses of condensable organic oxidation products and artifact effects of the accelerated chemistry in the PAM have been evaluated following the method of Palm et al. (2016) for the cases in Figure 2. HRLPI number size distributions were used to calculate the condensation sink needed in the loss calculation. Molar mass of 200 g mol<sup>-1</sup>, diffusion coefficient of 7\*10<sup>-6</sup> m<sup>2</sup> s<sup>-1</sup> (Tang et al., 2015) and rate constant for reaction with OH of 1\*10<sup>-11</sup> (Ziemann and Atkinson, 2012) were applied. For sticking coefficient selection  $\alpha = 1$  (assumed by Palm et al. 2016), the fraction of oxidation products condensed on particle phase was  $0.94 \pm 0.03$ , but for  $\alpha = 0.1$  the fraction of oxidation products condensed on particle phase was  $0.64 \pm 0.15$ .

The losses of sulfuric acid were also calculated in the same way. Diffusion coefficient of 1\*10<sup>-5</sup> (Hanson and Eisele, 2000),  $\alpha$  of 0.65 (Pöschl et al., 1998) and molar mass of 98.079 g mol<sup>-1</sup> were used for sulfuric acid. The fraction of sulfuric acid that condensed on particle phase was  $0.98 \pm 0.01$ . According to Lambe et al. (2011), SO<sub>2</sub> losses in the PAM are negligible.

It can be concluded that the effect of precursor losses and artifacts in the PAM was not substantial in our measurements. The measurement of ammonium nitrate and ammonium sulfate is difficult because ammonia sticks on the walls of sampling systems and instruments (Suarez-Bertoa et al., 2015; Heeb et al., 2012, 2008), which may result in wall losses or an artifact on subsequent measurements. The penetration of ammonia could not be calculated, but the measured ammonium concentrations varied clearly from one case to another, implicating that the source of the ammonia was indeed the exhaust line instead of e.g., the walls of the PAM. However, longer times for stabilization of the SP-AMS concentration would have been advantageous for the reliability of ammonium, and as a consequence, nitrate particle formation.

Karjalainen et al. (2016) and Timonen et al. (2017) estimated the effect of particle losses in a similar PAM chamber to be small. The particle losses measured by Karjalainen et al. (2016) depend on particle size and are below 10 % at the particle sizes with most particle mass. An exact calculation of the particle losses in the PAM chamber is not possible because the particle size and number increase while the aerosol sample flows through the chamber. An estimation for the particle mass losses in the chamber can be given, calculated using the average of HRLPI particle number size distributions before and after the chamber (similarly to the precursor-loss calculation by Palm et al., 2016) and the PAM particle loss curve. The particle mass loss according to this examination was  $20.3 \pm 3.7$  %. Most probably, however, the actual particle mass losses in the chamber were smaller because majority of the mass actually was located at larger particle sizes that HRLPI is unable to measure, where particle losses are smaller.

No loss corrections were done based on these calculations on the results presented in this article. If corrections had been made, the presented secondary aerosol productions and production factors would be slightly higher (less than 10 %) in Figures 2 and 4-6, and in Tables 1 and 2.

## 20 4 Conclusions

Natural gas engines emit very little particle mass, which can make them less harmful to human health than corresponding gasoline-, diesel- or marine-fuel-oil-fueled engines. However, secondary aerosol formation also increases human exposure to aerosol particles. When natural gas engines become more common in traffic and energy production, their potential for secondary particle formation will become more important and an even more relevant object for research. Therefore, the potential reduction of the total aerosol particle mass and related health and climate effects when shifting from liquid fuels to natural gas or biogas in combustion engines is important.

In this study, a retro-fitted natural gas engine equipped with exhaust after-treatment was studied in a laboratory in an engine test bench, using steady-state engine operation modes, i.e., constant engine speed and torque. The secondary aerosol formation was studied using a potential aerosol mass (PAM) chamber. Estimates for the atmospheric ages achieved by the PAM chamber were 4.6-10.7 days. In this study, the secondary aerosol mass potential of natural gas emission was measured to be at a small or medium level but well measurable. Compared to the primary particle mass emissions from the same engine, the secondary aerosol formation potential was substantial — approximately one to two orders of magnitude higher than the primary aerosol mass. However, the very small primary particle masses in some of the observed engine and catalyst operation modes

complicated this comparison. To estimate the quantity of the NG engine exhaust's SOA formation potential, it was on the same level as or lower than the SOA formation potential of a diesel vehicle equipped with an oxidation catalyst or that of warm (hot start) gasoline vehicles. However, the photochemical age that was produced by the PAM chamber in our study was longer (several days) than the photochemical ages achieved in the previous studies (several hours). Therefore, the SOA formation potential must not be directly compared. Also, despite the attempts to model PAM related losses and artifacts and to estimate particle losses in PAM, the measurements performed with PAM still involve uncertainties.

The total aged aerosol, i.e., the combined primary and secondary aerosol (downstream of a PAM chamber) of the NG engine, consisted of organic matter, nitrate, sulfate and ammonium, roughly in this order. It was found that aging of the exhaust generates low-volatility organics. However, the composition of the secondary aerosol was, for the most part, inorganic; the fraction of organic matter in the secondary particles varied between 37-56 %.

Exhaust after-treatment was found to have an effect on the secondary aerosol composition. High catalyst temperature promoted the formation of sulfate particles in total aged aerosol, whereas low catalyst temperatures promoted nitrate formation. Because the amount of  $\text{NO}_x$  emissions was reduced at the lower catalyst temperatures, it was concluded that the formation of nitrate in particles (total aged) depended on the ammonia concentration and sulfate particle formation rather than the  $\text{NO}_x$  emissions. Sulfate and nitrate are likely to exist in the forms of ammonium sulfate and ammonium nitrate. Therefore, what limits the nitrate mass in particles is most likely the availability of ammonia which is more related to the exhaust after-treatment than fuel or combustion process.

The total aged nanoparticles formed from the natural gas exhaust were found to be less volatile than the primary particles. This can affect their lifetime in the atmosphere and therefore their impact on the radiative balance of the atmosphere or their potential to act as cloud nuclei. A higher catalyst temperature impacts the total aged particles by decreasing their volatility or by decreasing their volatile fraction.

In our study, only one constant PAM UV-light voltage could be used. With improved instrumentation, a broader variation in light intensity could be achieved, thus improving our knowledge regarding the evolution of the secondary aerosol. Also, because natural gas is not the only widely used gaseous fuel, the secondary aerosol formation potential of a more extensive fuel selection would be interesting to study. The role of lubricating oil is also not known yet – studies performed at different natural gas combustion sites and with various lubricating oils would reveal its significance to secondary aerosol formation.

## 5 Data and code availability

The data and code of this study are available from the authors upon request.

### *Competing interests.*

The authors declare that they have no conflict of interest.



*Acknowledgements.* This study was funded by Tekes, the Finnish Funding Agency for Innovation, Neste, AGCO Power, Wärtsilä, Dinex Ecocat, Dekati, Suomi Analytics and Viking Line. Jenni Alanen acknowledges Gasum's gas funding for financial support. Pauli Simonen acknowledges the TUT Graduate School for its funding. Oskari Kangasniemi acknowledges the Nessling Foundation for its funding. Topi Rönkkö acknowledges the financial support from the Academy of Finland (ELTRAN project, grant number 293437).

## References

- Alanen, J., Saukko, E., Lehtoranta, K., Murtonen, T., Timonen, H., Hillamo, R., Karjalainen, P., Kuuluvainen, H., Harra, J., Keskinen, J., and Rönkkö, T.: The formation and physical properties of the particle emissions from a natural gas engine, *Fuel*, 162, 155–161, doi:10.1016/j.fuel.2015.09.003, 2015.
- 5 An, W. J., Pathak, R. K., Lee, B. H., and Pandis, S. N.: Aerosol volatility measurement using an improved thermodenuder: Application to secondary organic aerosol, *Journal of Aerosol Science*, 38, 305–314, doi:10.1016/j.jaerosci.2006.12.002, 2007.
- Anderson, M., Salo, K., and Fridell, E.: Particle- and Gaseous Emissions from an LNG Powered Ship, *Environmental Science and Technology*, 49, 12 568–12 575, doi:10.1021/acs.est.5b02678, 2015.
- Arffman, A., Yli-Ojanperä, J., Kalliokoski, J., Harra, J., Pirjola, L., Karjalainen, P., Rönkkö, T., and Keskinen, J.: High-resolution low-  
10 pressure cascade impactor, *Journal of Aerosol Science*, 78, 97–109, doi:10.1016/j.jaerosci.2014.08.006, 2014.
- Arnold, F., Pirjola, L., Rönkkö, T., Reichl, U., Schlager, H., Lähde, T., Heikkilä, J., and Keskinen, J.: First online measurements of sulfuric acid gas in modern heavy-duty diesel engine exhaust: Implications for nanoparticle formation, *Environmental Science and Technology*, 46, 11 227–11 234, doi:10.1021/es302432s, 2012.
- Atkinson, R., Baulch, D., Cox, R., Crowley, J., Hampson, R., Hynes, R., Jenkin, M., Kerr, J., Rossi, M., and Troe, J.: "IUPAC Subcommittee  
15 for gas kinetic data evaluation", *Evaluated kinetic data.*, <http://www.iupac-kinetic.ch.cam.ac.uk>, 2007.
- Bahreini, R., Middlebrook, A. M., Brock, C. A., Gouw, J. A. D., Mckeen, S. A., Williams, L. R., Daumit, K. E., Lambe, A. T., Massoli, P., Canagaratna, M. R., Ahmadov, R., Carrasquillo, A. J., Cross, E. S., Ervens, B., Holloway, J. S., Hunter, J. F., Onasch, T. B., Pollack, I. B., Roberts, J. M., Ryerson, T. B., Warneke, C., Davidovits, P., Worsnop, D. R., and Kroll, J. H.: Mass Spectral Analysis of Organic  
20 Aerosol Formed Downwind of the Deepwater Horizon Oil Spill : Field Studies and Laboratory Confirmations, *Environmental Science & Technology*, 46, 8025–8034, doi:10.1126/science.1200320, 2012.
- Bielaczyc, P., Woodburn, J., and Szczotka, A.: An assessment of regulated emissions and CO<sub>2</sub> emissions from a European light-duty CNG-fueled vehicle in the context of Euro 6 emissions regulations, *Applied Energy*, 117, 134–141, doi:10.1016/j.apenergy.2013.12.003, 2014.
- Bruns, E. A., El Haddad, I., Keller, A., Klein, F., Kumar, N. K., Pieber, S. M., Corbin, J. C., Slowik, J. G., Brune, W. H., Baltensperger, U., and Prévôt, A. S. H.: Inter-comparison of laboratory smog chamber and flow reactor systems on organic aerosol yield and composition,  
25 *Atmospheric Measurement Techniques*, 8, 2315–2332, 2015.
- Bullock, D. S. and Olfert, J. S.: Size, volatility, and effective density of particulate emissions from a homogeneous charge compression ignition engine using compressed natural gas, *Journal of Aerosol Science*, 75, 1–8, doi:10.1016/j.jaerosci.2014.04.005, 2014.
- Burkholder, J. B., Sander, S. P., Abbatt, J., Barker, J. R., Huie, R. E., Kolb, C. E., Kurylo, M. J., Orkin, V. L., Wilmouth, D. M., and H., W. P.: "Chemical Kinetics and Photochemical Data for Use in Atmospheric Studies, Evaluation No. 18," JPL Publication 15-10, Jet Propulsion  
30 Laboratory, Pasadena, <http://jpldataeval.jpl.nasa.gov>, 2015.
- Chirico, R., Decarlo, P. F., Heringa, M. F., Tritscher, T., Richter, R., Prévôt, A. S. H., Dommen, J., Weingartner, E., Wehrle, G., Gysel, M., Laborde, M., and Baltensperger, U.: Impact of aftertreatment devices on primary emissions and secondary organic aerosol formation potential from in-use diesel vehicles: Results from smog chamber experiments, *Atmospheric Chemistry and Physics*, 10, 11 545–11 563, doi:10.5194/acp-10-11545-2010, 2010.
- 35 Clegg, S. L. and Wexler, A. S.: Densities and Apparent Molar Volumes of Atmospherically Important Electrolyte Solutions. 2. The Systems H<sup>+</sup> – HSO<sub>4</sub><sup>-</sup> – SO<sub>4</sub><sup>2-</sup> – H<sub>2</sub>O from 0 to 3 mol kg<sup>-1</sup> as a Function of Temperature and H<sup>+</sup> – NH<sub>4</sub><sup>+</sup> – HSO<sub>4</sub><sup>-</sup> – SO<sub>4</sub><sup>2-</sup> – H<sub>2</sub>O from 0 to 6

- mol kg<sup>-1</sup> at 25 °C Using a Pitzer Ion Interaction Model, and NH<sub>4</sub>HSO<sub>4</sub> – H<sub>2</sub>O and (NH<sub>4</sub>)<sub>3</sub>H(SO<sub>4</sub>)<sub>2</sub> – H<sub>2</sub>O over Entire Concentration Range, *The Journal of Physical Chemistry A*, 115, 3461–3474, doi:10.1021/jp1089933, 2011.
- Damian, V., Sandu, A., Damian, M., Potra, F., and Carmichael, G. R.: The kinetic preprocessor KPP-a software environment for solving chemical kinetics, *Computers & Chemical Engineering*, 26, 1567–1579, doi:10.1016/S0098-1354(02)00128-X, 2002.
- 5 Dockery, D. and Pope III, A.: Acute Respiratory Effects of Particulate Air Pollution., *Annual Review of Public Health*, 15, 107–132, 1994.
- Eichler, P., Muller, M., Rohmann, C., Stengel, B., Orasche, J., Zimmermann, R., and Wisthaler, A.: Lubricating Oil as a Major Constituent of Ship Exhaust Particles, *Environmental Science & Technology Letters*, 4, 54–58, 2017.
- Gentner, D. R., Jathar, S. H., Gordon, T. D., Bahreini, R., Day, D. A., Haddad, I. E., Hayes, P. L., Pieber, S. M., Platt, S. M., Gouw, J. D., Goldstein, A. H., Harley, R. A., Jimenez, J. L., Prévôt, A. S. H., and Robinson, A. L.: Review of Urban Secondary Organic Aerosol Formation from Gasoline and Diesel Motor Vehicle Emissions, *Environmental Science & Technology*, 51, 1074–1096, doi:10.1021/acs.est.6b04509, 10 2017.
- Gordon, T. D., Tkacik, D. S., Presto, A. A., Zhang, M., Jathar, S. H., Nguyen, N. T., Massetti, J., Truong, T., Cicero-Fernandez, P., Maddox, C., Rieger, P., Chattopadhyay, S., Maldonado, H., Maricq, M. M., and Robinson, A. L.: Primary gas- and particle-phase emissions and secondary organic aerosol production from gasoline and diesel off-road engines, *Environmental Science and Technology*, 47, 14 137–15 14 146, doi:10.1021/es403556e, 2013.
- Gordon, T. D., Presto, A. A., May, A. A., Nguyen, N. T., Lipsky, E. M., Donahue, N. M., Gutierrez, A., Zhang, M., Maddox, C., Rieger, P., Chattopadhyay, S., Maldonado, H., Maricq, M. M., and Robinson, A. L.: Secondary organic aerosol formation exceeds primary particulate matter emissions for light-duty gasoline vehicles, *Atmospheric Chemistry and Physics*, 14, 4661–4678, doi:10.5194/acp-14-4661-2014, 2014a.
- 20 Gordon, T. D., Presto, A. A., Nguyen, N. T., Robertson, W. H., Na, K., Sahay, K. N., Zhang, M., Maddox, C., Rieger, P., Chattopadhyay, S., Maldonado, H., Maricq, M. M., and Robinson, A. L.: Secondary organic aerosol production from diesel vehicle exhaust: Impact of aftertreatment, fuel chemistry and driving cycle, *Atmospheric Chemistry and Physics*, 14, 4643–4659, doi:10.5194/acp-14-4643-2014, 2014b.
- Goyal, P. and Sidhartha: Present scenario of air quality in Delhi: A case study of CNG implementation, *Atmospheric Environment*, 37, 25 5423–5431, doi:10.1016/j.atmosenv.2003.09.005, 2003.
- Graves, B., Olfert, J., Patychuk, B., Dastanpour, R., and Rogak, S.: Characterization of Particulate Matter Morphology and Volatility from a Compression-Ignition Natural-Gas Direct-Injection Engine, *Aerosol Science and Technology*, 49, 589–598, doi:10.1080/02786826.2015.1050482, 2015.
- Hallquist, Å. M., Jerksjö, M., Fallgren, H., Westerlund, J., and Sjödin, Å.: Particle and gaseous emissions from individual diesel and CNG buses, *Atmospheric Chemistry and Physics*, 13, 5337–5350, doi:10.5194/acp-13-5337-2013, 2013.
- 30 Hallquist, M., Wenger, J. C., Baltensperger, U., Rudich, Y., Simpson, D., Claeys, M., Dommen, J., Donahue, N. M., George, C., Goldstein, A. H., Hamilton, J. F., Herrmann, H., Hoffmann, T., Iinuma, Y., Jang, M., Jenkin, M., Jimenez, J. L., Kiendler-Scharr, A., Maenhaut, W., McFiggans, G., Mentel, T. F., Monod, A., Prévôt, A. S. H., Seinfeld, J. H., Surratt, J. D., Szmigielski, R., and Wildt, J.: The formation, properties and impact of secondary organic aerosol: current and emerging issues, *Atmospheric Chemistry and Physics Discussions*, 9, 35 3555–3762, 2009.
- Hanson, D. R. and Eisele, F.: Diffusion of H<sub>2</sub>SO<sub>4</sub> in Humidified Nitrogen: Hydrated H<sub>2</sub>SO<sub>4</sub>, *Journal of Physical Chemistry A*, 104, 1715–1719, 2000.

- Heeb, N. V., Saxer, C. J., Forss, A.-m., and Brühlmann, S.: Trends of NO-, NO<sub>2</sub>-, and NH<sub>3</sub> -emissions from gasoline-fueled Euro-3- to Euro-4-passenger cars, *Atmospheric Environment*, 42, 2543–2554, doi:10.1016/j.atmosenv.2007.12.008, 2008.
- Heeb, N. V., Haag, R., Seiler, C., Schmid, P., Zennegg, M., Wichser, A., Ulrich, A., Honegger, P., Zeyer, K., Emmenegger, L., Zimmerli, Y., Czerwinski, J., Kasper, M., and Mayer, A.: Effects of a Combined Diesel Particle Filter-DeNO<sub>x</sub> System (DPN) on Reactive Nitrogen Compounds Emissions: A Parameter Study, *Environmental Science & Technology*, 46, 13 317–13 325, 2012.
- 5 Heikkilä, J., Rönkkö, T., Lähde, T., Lemmetty, M., Arffman, A., Virtanen, A., Keskinen, J., Pirjola, L., and Rothe, D.: Effect of open channel filter on particle emissions of modern diesel engine., *Journal of the Air & Waste Management Association (1995)*, 59, 1148–1154, doi:10.3155/1047-3289.59.10.1148, 2009.
- Huang, R. J., Zhang, Y., Bozzetti, C., Ho, K. F., Cao, J. J., Han, Y., Daellenbach, K. R., Slowik, J. G., Platt, S. M., Canonaco, F., Zotter, P., Wolf, R., Pieber, S. M., Bruns, E. A., Crippa, M., Ciarelli, G., Piazzalunga, A., Schwikowski, M., Abbaszade, G., Schnelle-Kreis, J., Zimmermann, R., An, Z., Szidat, S., Baltensperger, U., El Haddad, I., and Prévôt, A. S.: High secondary aerosol contribution to particulate pollution during haze events in China, *Nature*, 514, 218–222, doi:10.1038/nature13774, 2014.
- 10 Huffman, J. A., Docherty, K. S., Aiken, A. C., Cubison, M. J., Ulbrich, I. M., DeCarlo, P. F., Sueper, D., Jayne, J. T., Worsnop, D. R., Ziemann, P. J., and Jimenez, J. L.: Chemically-resolved aerosol volatility measurements from two megacity field studies, *Atmospheric Chemistry and Physics*, 9, 7161–7182, doi:10.5194/acpd-9-2645-2009, 2009.
- 15 Jathar, S. H., Miracolo, M. A., Tkacik, D. S., Donahue, N. M., Adams, P. J., and Robinson, A. L.: Secondary organic aerosol formation from photo-oxidation of unburned fuel: Experimental results and implications for aerosol formation from combustion emissions, *Environmental science & technology*, 47, 12 886–12 893, 2013.
- Jathar, S. H., Friedman, B., Galang, A. A., Link, M. F., Brophy, P., Volckens, J., Eluri, S., and Farmer, D. K.: Linking Load , Fuel , and Emission Controls to Photochemical Production of Secondary Organic Aerosol from a Diesel Engine, *Environmental Science & Technology*, 51, 1377–1386, doi:10.1021/acs.est.6b04602, 2017.
- 20 Jayaratne, E. R., Meyer, N. K., Ristovski, Z. D., Morawska, L., and Miljevic, B.: Critical Analysis of High Particle Number Emissions from Accelerating Compressed Natural Gas Buses, *Environmental Science and Technology*, 44, 3724–3731, 2010.
- Jayaratne, E. R., Meyer, N. K., Ristovski, Z. D., and Morawska, L.: Volatile properties of particles emitted by compressed natural gas and diesel buses during steady-state and transient driving modes, *Environmental Science and Technology*, 46, 196–203, doi:10.1021/es2026856, 2012.
- 25 Jenkin, M. E., Saunders, S. M., and Pilling, M. J.: The tropospheric degradation of volatile organic compounds: A protocol for mechanism development, *Atmospheric Environment*, 31, 81–104, doi:10.1016/S1352-2310(96)00105-7, 1997.
- Jenkin, M. E., Saunders, S. M., Wagner, V., and Pilling, M. J.: Protocol for the development of the Master Chemical Mechanism, MCM v3 (Part A): tropospheric degradation of non-aromatic volatile organic compounds, *Atmospheric Chemistry and Physics*, 3, 161–180, doi:10.5194/acp-3-161-2003, 2003.
- 30 Jimenez, J. L., Canagaratna, M. R., Donahue, N. M., Prevôt, A. S. H., Zhang, Q., Kroll, J. H., Decarlo, P. F., Allan, J. D., Coe, H., Ng, N. L., Aiken, A. C., Ulbrich, I. M., Grieshop, A. P., Duplissy, J., Wilson, K. R., Lanz, V. A., Hueglin, C., Sun, Y. L., Tian, J., Laaksonen, A., Raatikainen, T., Rautiainen, J., Vaattovaara, P., Ehn, M., Kulmala, M., Tomlinson, J. M., Cubison, M. J., Dunlea, E. J., Alfarra, M. R., Williams, P. I., Bower, K., Kondo, Y., Schneider, J., Drewnick, F., Borrmann, S., Weimer, S., Demerjian, K., Salcedo, D., Cottrell, L., Takami, A., Miyoshi, T., Shimojo, A., Sun, J. Y., Zhang, Y. M., Dzepina, K., Sueper, D., Jayne, J. T., Herndon, S. C., Williams, L. R., Wood, E. C., Middlebrook, A. M., Kolb, C. E., Baltensperger, U., and Worsnop, D. R.: Evolution of Organic Aerosols in the Atmosphere, *Science*, 326, 1525–1529, 2009.
- 35

- Johnson, T. V.: Review of diesel emissions and control, *International Journal of Engine Research*, 10, 275–285, 2009.
- Kanakidou, M., Seinfeld, J. H., Pandis, S. N., Barnes, I., Dentener, F. J., Facchini, M. C., Van Dingenen, R., Ervens, B., Nenes, A., Nielsen, C. J., Swietlicki, E., Putaud, J. P., Balkanski, Y., Fuzzi, S., Horth, J., Moortgat, G. K., Winterhalter, R., Myhre, C. E. L., Tsigaridis, K., Vignati, E., Stephanou, E. G., and Wilson, J.: Organic aerosol and global climate modelling: A review, *Atmospheric Chemistry and Physics*, 5, 1053–1123, 2005.
- 5 Kang, E., Root, M. J., and Brune, W. H.: Introducing the concept of Potential Aerosol Mass (PAM), *Atmospheric Chemistry and Physics Discussions*, 7, 9925–9972, doi:10.5194/acpd-7-9925-2007, 2007.
- Kang, E., Toohey, D. W., and Brune, W. H.: Dependence of SOA oxidation on organic aerosol mass concentration and OH exposure: Experimental PAM chamber studies, *Atmospheric Chemistry and Physics*, 11, 1837–1852, doi:10.5194/acp-11-1837-2011, 2011.
- 10 Karjalainen, P., Timonen, H., Saukko, E., Kuuluvainen, H., Saarikoski, S., Aakko-Saksa, P., Murtonen, T., Dal Maso, M., Ahlberg, E., Svenningsson, B., Brune, W. H., Hillamo, R., Keskinen, J., and Rönkkö, T.: Time-resolved characterization of primary and secondary particle emissions of a modern gasoline passenger car, *Atmospheric Chemistry and Physics*, 16, 8559–8470, doi:10.5194/acp-16-8559-2016, 2016.
- Künzi, L., Krapf, M., Daher, N., Dommen, J., Jeannet, N., Schneider, S., Platt, S., Slowik, J. G., Baumlin, N., Salathe, M., Prévôt, A. S. H., Kalberer, M., Strähl, C., Dübngben, L., Sioutas, C., Baltensperger, U., and Geiser, M.: Toxicity of aged gasoline exhaust particles to normal and diseased airway epithelia, *Scientific Reports*, 5, 11 801, doi:10.1038/srep11801, 2015.
- 15 Lambe, A. T., Ahern, A. T., Williams, L. R., Slowik, J. G., Wong, J. P. S., Abbatt, J. P. D., Brune, W. H., Ng, N. L., Wright, J. P., Croasdale, D. R., Worsnop, D. R., Davidovits, P., and Onasch, T. B.: Characterization of aerosol photooxidation flow reactors: Heterogeneous oxidation, secondary organic aerosol formation and cloud condensation nuclei activity measurements, *Atmospheric Measurement Techniques*, 4, 445–461, doi:10.5194/amt-4-445-2011, 2011.
- 20 Lambe, A. T., Chhabra, P. S., Onasch, T. B., Brune, W. H., Hunter, J. F., Kroll, J. H., Cummings, M. J., Brogan, J. F., Parmar, Y., Worsnop, D. R., Kolb, C. E., and Davidovits, P.: Effect of oxidant concentration, exposure time, and seed particles on secondary organic aerosol chemical composition and yield, *Atmospheric Chemistry and Physics*, 15, 3063–3075, doi:10.5194/acp-15-3063-2015, 2015.
- Lehtoranta, K., Murtonen, T., Vesala, H., Koponen, P., Alanen, J., Simonen, P., Rönkkö, T., Timonen, H., Saarikoski, S., Maunula, T., Kallinen, K., and Korhonen, S.: Natural gas engine emission reduction by catalysts, *Submitted to Emission Control Science & Technology*, 25 2016.
- Lelieveld, J., Evans, J. S., Fnais, M., Giannadaki, D., and Pozzer, A.: The contribution of outdoor air pollution sources to premature mortality on a global scale., *Nature*, 525, 367–71, doi:10.1038/nature15371, 2015.
- Link, M. F., Kim, J., Park, G., Lee, T., Park, T., Bin, Z., Sung, K., Kim, P., Kang, S., Soo, J., Choi, Y., Son, J., Lim, H.-j., and Farmer, D. K.: Elevated production of NH<sub>4</sub>NO<sub>3</sub> from the photochemical processing of vehicle exhaust : Implications for air quality in the Seoul Metropolitan Region, *Atmospheric Environment*, 156, 95–101, doi:10.1016/j.atmosenv.2017.02.031, 2017.
- 30 Mao, J., Ren, X., Brune, W. H., Olson, J. R., Crawford, J. H., Fried, A., Huey, L. G., Cohen, R. C., and Heikes, B.: Airborne measurement of OH reactivity during INTEX-B, *Atmospheric Chemistry and Physics*, 9, 163–173, 2009.
- May, A. A., Nguyen, N. T., Presto, A. A., Gordon, T. D., Lipsky, E. M., Karve, M., Gutierrez, A., Robertson, W. H., Zhang, M., Brandow, C., Chang, O., Chen, S., Cicero-fernandez, P., Dinkins, L., Fuentes, M., Huang, S.-m., Ling, R., Long, J., Maddox, C., Massetti, J., Mccauley, E., Miguel, A., Na, K., Ong, R., Pang, Y., Rieger, P., Sax, T., Truong, T., Vo, T., Chattopadhyay, S., Maldonado, H., Maricq, M. M., and Robinson, A. L.: Gas- and particle-phase primary emissions from in-use , on-road gasoline and diesel vehicles, *Atmospheric Environment*, 88, 247–260, 2014.

- McWhinney, R. D., Gao, S. S., Zhou, S., and Abbatt, J. P. D.: Evaluation of the effects of ozone oxidation on redox-cycling activity of two-stroke engine exhaust particles, *Environmental Science and Technology*, 45, 2131–2136, doi:10.1021/es102874d, 2011.
- Middlebrook, A. M., Bahreini, R., Jimenez, J. L., and Canagaratna, M. R.: Evaluation of Composition-Dependent Collection Efficiencies for the Aerodyne Aerosol Mass Spectrometer using Field Data, *Aerosol Science and Technology*, 46, 258–271, doi:10.1080/02786826.2011.620041, 2012.
- 5 Mikkanen, P. and Moisio, M.: Sampling Method for Particle Measurements of Vehicle Exhaust, *SAE International Journal of Fuels and Lubricants*, pp. 1–6, 2001.
- Mirme, A.: Electrical aerosol spectrometry, Ph.D. thesis, University of Tartu, 1994.
- Murphy, B. N., Donahue, N. M., Robinson, A. L., and Pandis, S. N.: A naming convention for atmospheric organic aerosol, *Atmospheric Chemistry and Physics*, 14, 5825–5839, doi:10.5194/acp-14-5825-2014, 2014.
- 10 Murtonen, T., Lehtoranta, K., Korhonen, S., and Vesala, H.: Imitating emission matrix of large natural catalyst studies in engine laboratory, CIMAC congress, 2016.
- Myhre, G., Shindell, D., Bréon, F. M., Collins, W., Fuglestedt, J., Huang, J., Koch, D., Lamarque, J. F., Lee, D., and Mendoza, B.: Anthropogenic and natural radiative forcing, *Climate change*, 423, 2013.
- 15 Nordin, E. Z., Eriksson, A. C., Roldin, P., Nilsson, P. T., Carlsson, J. E., Kajos, M. K., Hellén, H., Wittbom, C., Rissler, J., Löndahl, J., Swietlicki, E., Svenningsson, B., Bohgard, M., Kulmala, M., Hallquist, M., and Pagels, J. H.: Secondary organic aerosol formation from idling gasoline passenger vehicle emissions investigated in a smog chamber, *Atmospheric Chemistry and Physics*, 13, 6101–6116, doi:10.5194/acp-13-6101-2013, 2013.
- Ntziachristos, L., Giechaskiel, B., Pistikopoulos, P., Samaras, Z., Mathis, U., Mohr, M., Ristimaki, J., Keskinen, J., Mikkanen, P., Casati, R., Scheer, V., and Vogt, R.: Performance evaluation of a novel sampling and measurement system for exhaust particle characterization, *SAE 2004 World Congress and Exhibition, 2004-01-14*, doi:10.4271/2004-01-1439, 2004.
- 20 Ntziachristos, L., Saukko, E., Rönkkö, T., Lehtoranta, K., Timonen, H., Hillamo, R., and Keskinen, J.: Impact of sampling conditions and procedure on particulate matter emissions from a marine diesel engine, CIMAC congress, 2016.
- Palm, B. B., Campuzano-jost, P., Ortega, A. M., Day, D. A., Kaser, L., Jud, W., Karl, T., Hansel, A., Hunter, J. F., Cross, E. S., Kroll, J. H., Peng, Z., Brune, W. H., and Jimenez, J. L.: In situ secondary organic aerosol formation from ambient pine forest air using an oxidation flow reactor, *Atmospheric Chemistry and Physics*, 16, 2943–2970, model found in PAM Wiki: Estimation Equations: Estimation Equations for LVOC Condensation Losses, <https://sites.google.com/site/pamwiki/hardware/estimation-equations>, Accessed: 2017-05-05, 2016.
- 25 Pieber, S. M., Haddad, I. E., Slowik, J. G., Canagaratna, M. R., Jayne, J. T., Platt, S. M., Bozzetti, C., Daellenbach, K. R., Fro, R., Vlachou, A., Klein, F., Dommen, J., Miljevic, B., Jime, J. L., Worsnop, D. R., Baltensperger, U., and Prévôt, A. S. H.: Inorganic Salt Interference on CO<sub>2</sub>+ in Aerodyne AMS and ACSM Organic Aerosol Composition Studies, *Environmental Science & Technology*, 50, 10 494–10 503, doi:10.1021/acs.est.6b01035, 2016.
- 30 Pirjola, L., Dittrich, A., Niemi, J. V., Saarikoski, S., Timonen, H., Kuuluvainen, H., Järvinen, A., Kousa, A., Rönkkö, T., and Hillamo, R.: Physical and Chemical Characterization of Real-World Particle Number and Mass Emissions from City Buses in Finland, doi:10.1021/acs.est.5b04105, 2016.
- 35 Platt, S. M., El Haddad, I., Zardini, A. A., Clairotte, M., Astorga, C., Wolf, R., Slowik, J. G., Temime-Roussel, B., Marchand, N., Ježek, I., Drinovec, L., Mocnik, G., Möhler, O., Richter, R., Barnet, P., Bianchi, F., Baltensperger, U., and Prévôt, A. S. H.: Secondary organic aerosol formation from gasoline vehicle emissions in a new mobile environmental reaction chamber, *Atmospheric Chemistry and Physics*, 13, 9141–9158, doi:10.5194/acp-13-9141-2013, 2013.

- Pöschl, U., Canagaratna, M., Jayne, J. T., Molina, L. T., Worsnop, D. R., Kolb, C. E., and Molina, M. J.: Mass Accommodation Coefficient of H<sub>2</sub>SO<sub>4</sub> Vapor on Aqueous Sulfuric Acid Surfaces and Gaseous Diffusion Coefficient of H<sub>2</sub>SO<sub>4</sub> in N<sub>2</sub>/H<sub>2</sub>O, *Journal of Physical Chemistry A*, 102, 10 082–10 089, 1998.
- 5 Rager, J. E., Lichtveld, K., Ebersviller, S., Smeester, L., Jaspers, I., Sexton, K. G., and Fry, R. C.: A toxicogenomic comparison of primary and photochemically altered air pollutant mixtures, *Environmental Health Perspectives*, 119, 1583–1589, doi:10.1289/ehp.1003323, 2011.
- Robinson, A. L., Donahue, N. M., Shrivastava, M. K., Weitkamp, E. A., Sage, A. M., Grieshop, A. P., Lane, T. E., Pierce, J. R., and Pandis, S. N.: Rethinking Organic Aerosols: Semivolatile Emissions and Photochemical Aging, *Science*, 315, 1259–1262, doi:10.1126/science.1133061, 2007.
- 10 Rönkkö, T., Lähde, T., Heikkilä, J., Pirjola, L., Bauschke, U., Arnold, F., Schlager, H., Rothe, D., Yli-Ojanperä, J., and Keskinen, J.: Effects of gaseous sulphuric acid on diesel exhaust nanoparticle formation and characteristics, *Environmental Science and Technology*, 47, 11 882–11 889, doi:10.1021/es402354y, 2013.
- Samy, S. and Zielinska, B.: Secondary organic aerosol production from modern diesel engine emissions, *Atmospheric Chemistry and Physics*, 10, 609–625, 2010.
- Saunders, S. M., Jenkin, M. E., Derwent, R. G., and Pilling, M. J.: Protocol for the development of the Master Chemical Mechanism, MCM v3 (Part A): tropospheric degradation of non-aromatic volatile organic compounds, *Atmospheric Chemistry and Physics*, 3, 161–180, doi:10.5194/acp-3-161-2003, 2003.
- 15 Seinfeld, J. H. and Pandis, S. N.: *Atmospheric Chemistry and Physics: From Air Pollution to Climate Change*, Wiley, 3 edn., 2016.
- Simonen, P., Saukko, E., Karjalainen, P., Timonen, H., Bloss, M., and Aakko-Saksa, P.: A new oxidation flow reactor for measuring secondary aerosol formation of rapidly changing emission sources, *Atmospheric Measurement Techniques*, 10, 1519–1537, doi:10.5194/amt-10-1519-2017, 2017.
- 20 Suarez-Bertoa, R., Zardini, A. A., Lilova, V., Meyer, D., Nakatani, S., Hibel, F., Ewers, J., Clairrotte, M., Hill, L., and Astorga, C.: Intercomparison of real-time tailpipe ammonia measurements from vehicles tested over the new world-harmonized light-duty vehicle test cycle (WLTC), *Environmental Science and Pollution Research*, 22, 7450–7460, 2015.
- Tang, M. J., Shiraiwa, M., Pöschl, U., Cox, R. A., and Kalberer, M.: Compilation and evaluation of gas phase diffusion coefficients of reactive trace gases in the atmosphere : Volume 2 . Diffusivities of organic compounds , pressure-normalised mean free paths , and average Knudsen numbers for gas uptake calculations, *Atmospheric Chemistry and Physics*, 15, 5585–5598, doi:10.5194/acp-15-5585-2015, 2015.
- 25 Thiruvengadam, A., Besch, M., Yoon, S., Collins, J., Kappanna, H., Carder, D., Ayala, A., Herner, J., and Gautam, M.: Characterization of particulate matter emissions from a current technology natural gas engine, *Environmental Science and Technology*, 48, 8235–8242, doi:10.1021/es5005973, 2014.
- 30 Timonen, H., Karjalainen, P., Saukko, E., Saarikoski, S., Aakko-saksa, P., and Simonen, P.: Influence of fuel ethanol content on primary emissions and secondary aerosol formation potential for a modern flex-fuel gasoline vehicle, *Atmospheric Chemistry and Physics*, 17, 5311–5329, doi:10.5194/acp-17-5311-2017, 2017.
- Tkacik, D. S., Lambe, A. T., Jathar, S., Li, X., Presto, A. A., Zhao, Y., Blake, D., Meinardi, S., Jayne, J. T., Croteau, P. L., and Robinson, A. L.: Secondary organic aerosol formation from in-use motor vehicle emissions using a potential aerosol mass reactor, *Environmental Science and Technology*, 48, 11 235–11 242, doi:10.1021/es502239v, 2014.
- 35 Virtanen, A., Joutsensaari, J., Koop, T., Kannosto, J., Yli-Pirilä, P., Leskinen, J., Mäkelä, J. M., Holopainen, J. K., Pöschl, U., Kulmala, M., Worsnop, D. R., and Laaksonen, A.: An amorphous solid state of biogenic secondary organic aerosol particles. *SI, Nature*, 467, 824–7, doi:10.1038/nature09455, 2010.

Weitkamp, E. A., Sage, A. M., Pierce, J. R., Donahue, N. M., and Robinson, A. L.: Organic aerosol formation from photochemical oxidation of diesel exhaust in a smog chamber, *Environmental Science and Technology*, 41, 6969–6975, doi:10.1021/es070193r, 2007.

Ziemann, P. J. and Atkinson, R.: Kinetics, products, and mechanisms of secondary organic aerosol formation, *Chemical Society Reviews*, 41, 6582–6605, doi:10.1039/c2cs35122f, 2012.



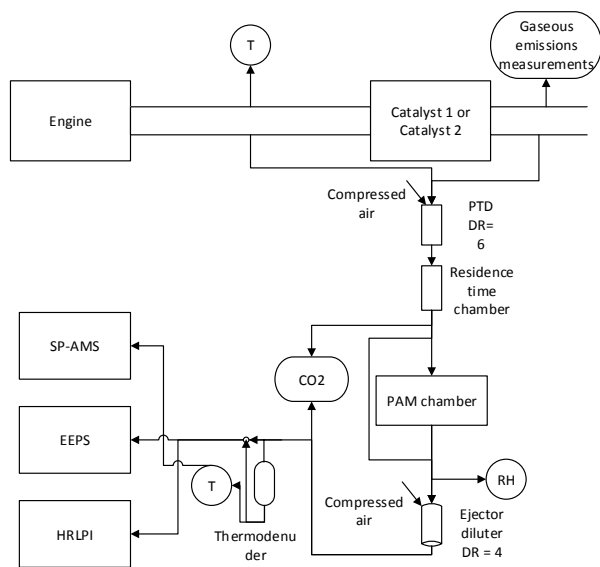

**Figure 1.** A schematic picture of the measurement setup.

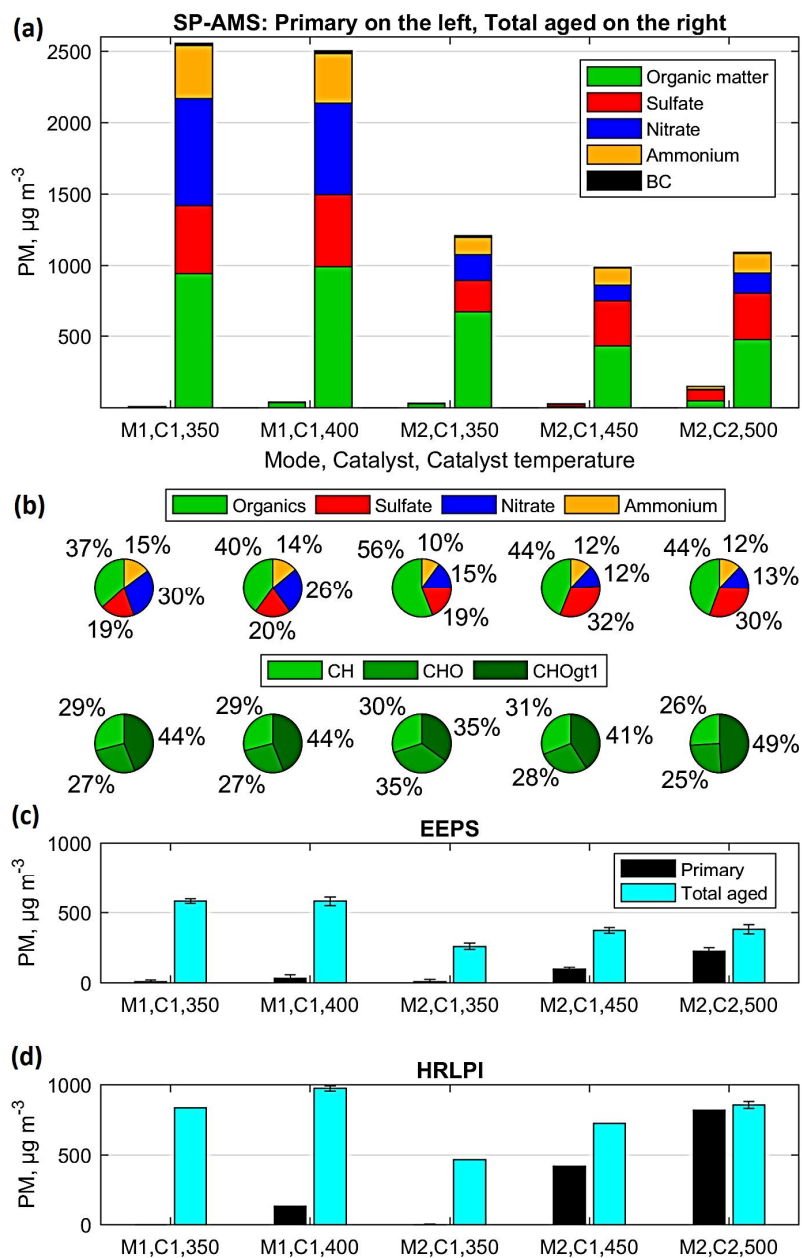

**Figure 2.** Exhaust primary and total aged particle mass concentrations measured by (a) SP-AMS, (c) EEPS and (d) HRLPI at different engine modes and catalyst temperatures. All values have been corrected by dilution ratio used in the sampling system. Secondary particle mass can be calculated by subtracting primary from total aged emission. The composition of the total aged particulate matter and the organic particulate matter is presented as pie charts (b). The fraction of black carbon is less or equal to 1 % and therefore left out from the pie charts.

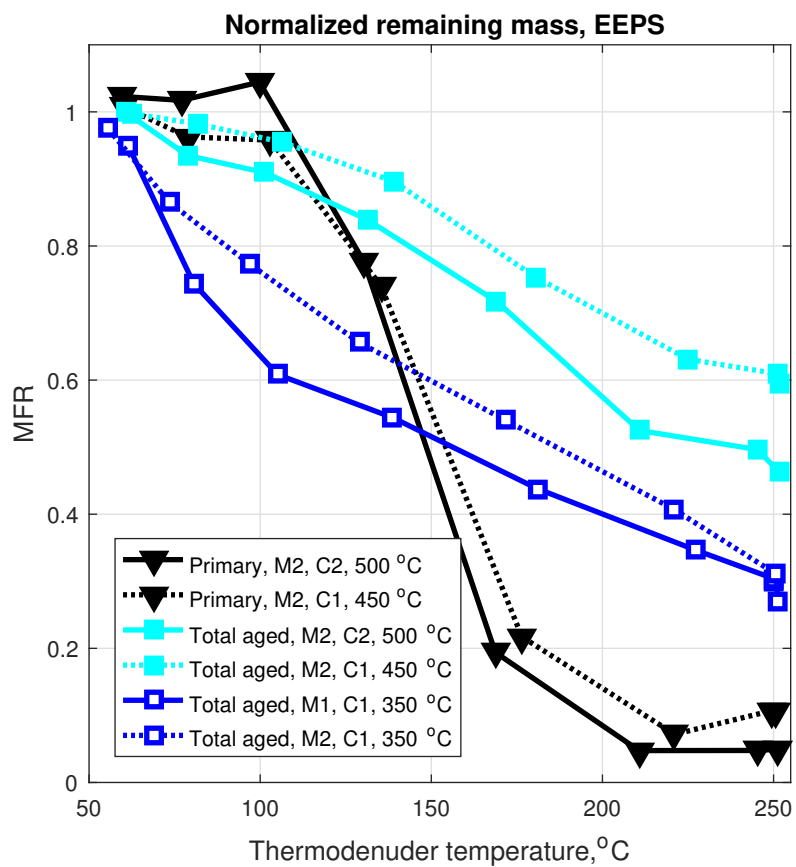

**Figure 3.** Results of particle volatility measurements. Particle mass fraction remaining (MFR) after the thermodenuder treatment for the exhaust aerosol sample of three different types of particle emission from the natural gas engine. MFR values were calculated from the size distributions measured by EEPS with unit mass assumption.

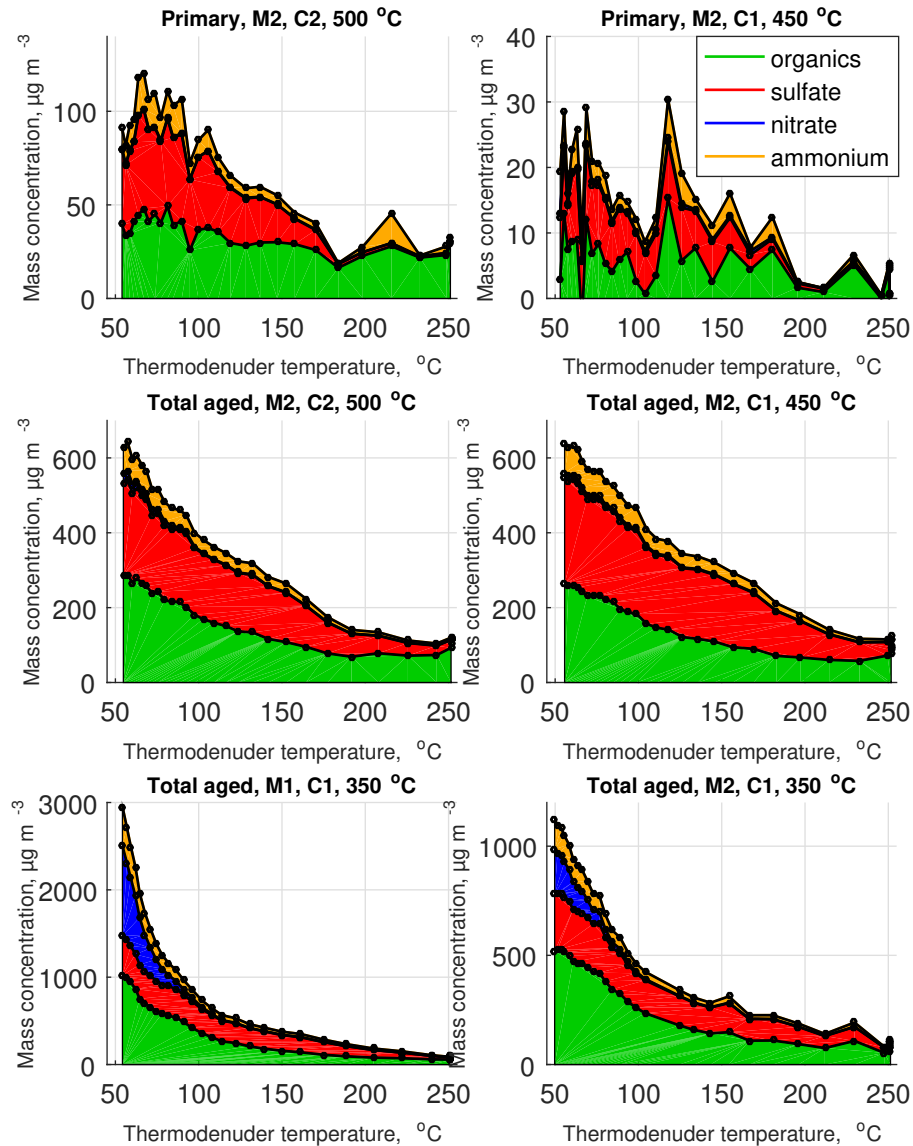

**Figure 4.** Concentration of different chemical compounds of particles remaining after the thermodenuder treatment conducted for the exhaust aerosol. The mass concentrations were measured using the SP-AMS at different thermodenuder temperatures and corrected by the dilution ratio used in the sampling system.

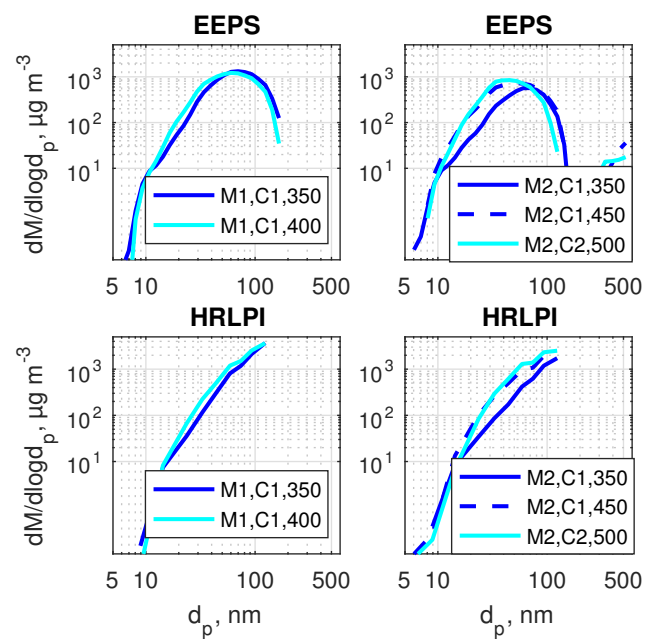

**Figure 5.** Particle mass size distributions measured by EEPS and HRLPI and corrected by the dilution ratios. Cases M1, C1 on the left, and cases M2, C1 and M2, C2 on the right. Cyan curves stand for the higher catalyst temperatures and blue for the lower ones.

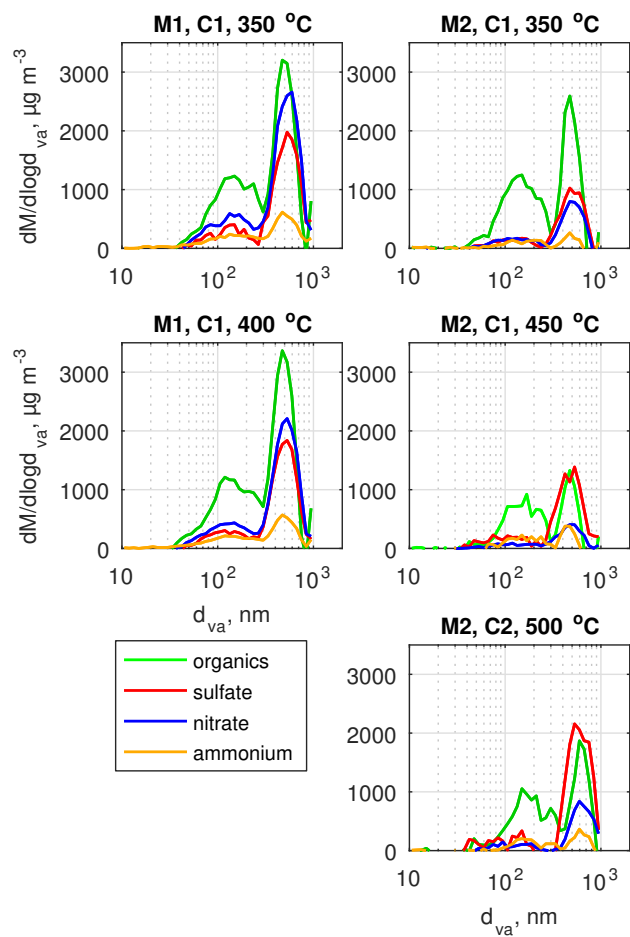

**Figure 6.** Component-wise particle mass size distributions measured by SP-AMS and corrected by the dilution ratios.

**Table 1.** (a): Particle mass concentrations of primary and total aged particles (SP-AMS), increase of particle mass (%) in PAM chamber, calculated atmospheric ages simulated by PAM chamber and O/C ratios measured by SP-AMS. If no increase in PAM is presented, it is larger than 100 000 %. (b): The particle mass of species (SP-AMS) in all cases and are also presented in the table as well as (c): the concentrations of gaseous emissions in raw exhaust (published already in Lehtoranta et al. 2016). Values have been corrected by the dilution ratio used in the sampling system.

| (a)                                                          | M1, C1, 350 °C | M1, C1, 400 °C | M2, C1, 350 °C | M2, C1, 450 °C | M2, C2, 500 °C |
|--------------------------------------------------------------|----------------|----------------|----------------|----------------|----------------|
| Primary PM, $\mu\text{g m}^{-3}$ , SP-AMS                    | 9              | 40             | 31             | 28             | 150            |
| Total aged PM, $\mu\text{g m}^{-3}$ , SP-AMS                 | 2554           | 2503           | 1210           | 989            | 1093           |
| Increase in PAM, %, SP-AMS                                   | 26800          | 6210           | 3840           | 3440           | 630            |
| Increase in PAM, %, EEPS                                     | 7130           | 1660           | 2680           | 278            | 69             |
| Increase in PAM, %, HRLPI                                    | -              | 643            | 22800          | 75             | 4              |
| Atmospheric age, days                                        | 10.0           | 10.7           | 4.6            | 4.7            | 9.3            |
| O/C                                                          | 1              | 1.1            | 1              | 0.9            | 1.2            |
| (b): Total aged PM of species, $\mu\text{g m}^{-3}$ , SP-AMS |                |                |                |                |                |
| Organic                                                      | 944            | 993            | 669            | 430            | 476            |
| Sulfate                                                      | 475            | 502            | 228            | 317            | 330            |
| Nitrate                                                      | 749            | 641            | 182            | 115            | 143            |
| Ammonium                                                     | 372            | 348            | 119            | 121            | 135            |
| (c): Concentrations of gaseous emissions, ppm                |                |                |                |                |                |
| NO <sub>x</sub>                                              | 3              | 4              | 3              | 12             | 4              |
| CO                                                           | 14             | 7              | 14             | 8              | 4              |
| Methane                                                      | 906 ± 16       | 904 ± 30       | 2232 ± 74      | 2238 ± 51      | 1360 ± 7       |
| Ethane                                                       | 18             | 17             | 68             | 49             | 15             |
| Propane                                                      | 1              | 1              | 21             | 6              | 1              |
| Ethene                                                       | 0              | 0              | 2              | 0              | 0              |

**Table 2.** SOA production factors calculated from the SP-AMS data in this study, and in literature (Age = OH-exposure/ ( $1.5 \times 10^6$  molecules  $\text{cm}^{-3}$ )). Primary organic aerosol has been subtracted from the total aged organic aerosol. \*Calculated assuming gasoline density  $0.75 \text{ kg l}^{-1}$  and consumption  $7.9 \text{ l (100 km)}^{-1}$ .

| Source                                     | Age       | PF ( $\text{mg kg}_{\text{fuel}}^{-1}$ ) | Reference                 |
|--------------------------------------------|-----------|------------------------------------------|---------------------------|
| NG engine:                                 |           |                                          |                           |
| M1, C1, 350 °C                             | 10 days   | 19                                       | This study                |
| M1, C1, 400 °C                             | 10.7 days | 20                                       | This study                |
| M2, C1, 350 °C                             | 4.6 days  | 12                                       | This study                |
| M2, C1, 450 °C                             | 4.7 days  | 9                                        | This study                |
| M2, C2, 500 °C                             | 9.3 days  | 9                                        | This study                |
| Diesel/biodiesel nonroad engine, idling    | 1.5 days  | 5300-12000                               | Jathar et al. (2017)      |
| Diesel/biodiesel nonroad engine, 50 % load | 0.8 days  | 400-900                                  | Jathar et al. (2017)      |
| Ethanol vehicle, NEDC cycle                | ~1-8 days | <2 *                                     | Timonen et al. (2017)     |
| Gasoline vehicle, parts of NEDC cycle      | ~1-8 days | 7-155 *                                  | Karjalainen et al. (2016) |
| Vehicle fleet in highway tunnel            | 5.4 days  | 350                                      | Tkacik et al. (2014)      |
| Gasoline vehicle, hot start                | 3 h       | 13.8                                     | Gordon et al. (2014a)     |
| Gasoline vehicle, cold start               | 3 h       | 19-60                                    | Gordon et al. (2014a)     |
| Gasoline vehicles, idling                  | 3-6 h     | 5-90                                     | Nordin et al. (2013)      |
| Gasoline vehicles, cold start              | Unknown   | 480                                      | Nordin et al. (2013)      |
| Gasoline vehicle, NEDC cycle               | 8 h       | 345                                      | Platt et al. (2013)       |
| Small 2-stroke off-road engine             | 1-7 h     | 240-1400                                 | Gordon et al. (2013)      |
| Small 4-stroke off-road engine             | 1 h       | 100-130                                  | Gordon et al. (2013)      |
| Diesel vehicle, deactivated catalyst       | Unknown   | 230-560                                  | Chirico et al. (2010)     |
| Diesel vehicle, catalyst working           | Unknown   | 12-20                                    | Chirico et al. (2010)     |



**Table 3.** The temperatures where 50 % of the volatile fraction of species has evaporated.

| T <sub>volatile, 50 %</sub><br>(°C) | Primary        | Primary        | Total aged     | Total aged     | Total aged     | Total aged     |
|-------------------------------------|----------------|----------------|----------------|----------------|----------------|----------------|
|                                     | M2, C2, 500 °C | M2, C1, 450 °C | M2, C2, 500 °C | M2, C1, 450 °C | M1, C1, 350 °C | M2, C1, 350 °C |
| Organics                            | 115            | -              | 99             | 104            | 87             | 93             |
| Sulfate                             | 125            | -              | 152            | 168            | 120            | 147            |
| Nitrate                             | 72             | -              | 80             | 84             | 65             | 65             |
| Ammonium                            | 104            | -              | 97             | 112            | 70             | 79             |

# Comparison of primary and secondary particle formation from natural gas engine exhaust and of their volatility characteristics

Jenni Alanen<sup>1</sup>, Pauli Simonen<sup>1</sup>, Sanna Saarikoski<sup>2</sup>, Hilikka Timonen<sup>2</sup>, Oskari Kangasniemi<sup>1</sup>, Erkka Saukko<sup>1</sup>, Risto Hillamo<sup>2</sup>, Kati Lehtoranta<sup>3</sup>, Timo Murtonen<sup>3</sup>, Hannu Vesala<sup>3</sup>, Jorma Keskinen<sup>1</sup>, and Topi Rönkkö<sup>1</sup>

<sup>1</sup>Aerosol Physics, Faculty of Natural Sciences, Tampere University of Technology, P.O. Box 692, 33101 Tampere, Finland

<sup>2</sup>Atmospheric Composition Research, Finnish Meteorological Institute, P.O. Box 503, 00101 Helsinki, Finland

<sup>3</sup>VTT Technical Research Centre of Finland Ltd., P.O. Box 1000, 02044 VTT, Espoo, Finland

Correspondence to: Topi Rönkkö (topi.ronkko@tut.fi)

**Abstract.** Natural gas usage in traffic and energy production sector is a growing trend worldwide, thus, an assessment of its effects on air quality, human health and climate is required. Engine exhaust is a source of primary particulate emissions and secondary aerosol precursors that, which both contribute to air quality and can cause adverse health effects. Technologies, such as cleaner engines or fuels, that produce less primary and secondary aerosol could potentially significantly decrease the atmospheric particle concentrations and their adverse effects. In this study, we used a potential aerosol mass (PAM) chamber to investigate the secondary aerosol formation potential of natural gas engine exhaust. The PAM chamber was used with a constant UV-light voltage that resulted in an equivalent atmospheric age, which resulted in relatively long equivalent atmospheric ages of 11 days at a maximum most. The studied retrofitted natural gas engine exhaust was observed to have a low or moderate secondary particle formation potential, although the simulated atmospheric ages were relatively long. The secondary organic aerosol (SOA) formation potential was measured to be 8-18 mg kg<sub>fuel</sub><sup>-1</sup>. However, the mass of form secondary aerosol. The mass of the total aged particles, i.e., particle mass measured downstream of the PAM chamber, was 6-184-6-268 times as high as the mass of the emitted primary exhaust particles. The secondary organic aerosol (SOA) formation potential was measured to be 8-18 mg kg<sub>fuel</sub><sup>-1</sup>. The total aged particles consisted mainly of nitrate, mainly consisted of organic matter, nitrate, sulfate and ammonium, with the fractions depending on exhaust after-treatment and used engine parameters the engine parameters used. Also the volatility, composition and concentration of the total aged particles were found to depend on the engine operating mode, catalyst temperature and catalyst type. For example, a high catalyst temperature promoted the formation of sulfate particles, whereas a low catalyst temperature promoted nitrate formation. However, especially in particular, the concentration of nitrate needed a long time to stabilize more than half an hour to stabilize, which complicated the conclusions but also indicates the sensitivity of nitrate measurements on experimental parameters such as emission source and system temperatures. Sulfate was measured to have the highest evaporation temperature and nitrate, and nitrate had the lowest. The evaporation temperature of ammonium depended on the fractions of nitrate and sulfate in the particles. The average volatility of the total aged particles was measured to be lower than that of primary particles, indicating better stability of the aged natural gas engine emitted aerosol in the atmosphere. According to the results of this study, the shift from traditional liquid fuels to natural gas can have a reducing effect on total particle pollution in the atmosphere; in addition to the very low primary particle emissions, also

~~the secondary organic aerosol formation potential of natural gas exhaust is lower or on the same level as the SOA formation potential measured on liquid fuels in previous studies~~exhaust of a natural gas engine equipped with a catalyst forms secondary aerosol when the atmospheric ages in a PAM chamber are several days. The secondary aerosol matter has different physical characteristics from those of primary particulate emissions.

## 5 1 Introduction

Primary aerosol particles are ~~emitted directly~~directly emitted into the atmosphere by various anthropogenic sources, such as vehicles, engines ~~or and~~ power plants, and biogenic sources. Secondary aerosol particle mass forms ~~during as a consequence of~~ the atmospheric oxidation of emitted precursor gases. In this process, the saturation vapor pressure of the organic and inorganic gases becomes lower, thus allowing them to transfer into particle phase ~~by through~~ condensation and nucleation (Hallquist et al., 2009; Murphy et al., 2014). In addition to biogenic sources, also traffic and other anthropogenic sources ~~are contributors~~contribute to secondary aerosol formation (Kanakidou et al., 2005).

Fine particles ( $<2.5 \mu\text{m}$ ) are found to cause ~~people~~-adverse health effects and premature mortality ~~in people~~ (Dockery and Pope III, 1994; Lelieveld et al., 2015). The relative contribution of primary and secondary particles on ~~the these~~ health effects is still unknown, but there are indications that secondary particles can be even more hazardous than primary particles (Künzi et al., 2015; McWhinney et al., 2011; Rager et al., 2011). Therefore, both primary and secondary particle emissions must be taken into consideration when evaluating the health effects of particle emissions.

Aerosols play an important role in ~~the~~ climate as well. Fine particles in the atmosphere affect the radiative balance of the atmosphere by either warming or cooling it, depending on their properties (Myhre et al., 2013)~~but; however,~~ large uncertainties remain ~~in regarding~~ the contribution of particles to climate change ~~or and~~ its prevention. Clouds ~~also~~ contribute to the ~~radiative balance of the atmosphere, too~~atmosphere's radiative balance. Aging of an aerosol can lead to increased hygroscopicity of the particles (Kanakidou et al., 2005) and a higher likelihood that they act as cloud condensation nuclei. The preservation and lifetime of the particles in the atmosphere partly define how large their impact is on ~~the~~ climate.

The formation process of secondary inorganic aerosol can be modeled rather accurately because the number of different inorganic precursors is small and their oxidation reactions are well known. Secondary organic aerosol (SOA) is a more complex subject area due to the vast ~~amount~~number of different organic compounds, their potential reactions and the still unknown participation of all compounds in secondary aerosol formation (Hallquist et al., 2013; Jimenez et al., 2009). ~~Hence,~~ SOA has been a hot topic in aerosol science during the past decade (Huang et al., 2014; Robinson et al., 2007; Virtanen et al., 2010). ~~However, also the,~~ but there are still many open questions in considering, for example, the SOA formation from vehicle emissions (Gentner et al., 2017). Also the relative fractions of secondary organic and inorganic aerosol from various emission sources still need to be studied. Both secondary organic and secondary inorganic aerosol can ~~significantly contribute~~contribute significantly to air quality deterioration (Huang et al., 2014).

Particle number and mass emission regulations for ~~combustion engines have~~ passenger cars and heavy-duty engines have substantially decreased the primary particle emissions from vehicles, ~~especially the emissions from diesel vehicles~~ (e.g., May et al., 2014; Joh

Secondary particle precursor emissions or secondary aerosol formation potential are not directly regulated, but some of the current emission regulations affect secondary particle precursor emissions indirectly. For instance, oxidative ~~exhaust after-treatment devices~~ catalysts reduce the total hydrocarbon emissions and thus probably the emissions of secondary organic aerosol precursors ~~but simultaneously;~~ simultaneously, they also change the oxidation state of inorganic compounds.

5 Furthermore, the mandatory national targets of 10 % biofuel (ethanol) in gasoline in EU may have decreased the SOA formation in the atmosphere (Timonen et al., 2017). In general, vehicles emit ~~substantial amounts of a substantial fraction of anthropogenic~~ precursors for SOA formation ~~, so that (Gentner et al., 2017), and~~ the amount of potential SOA often exceeds the emissions of primary organic aerosol. For instance, gasoline vehicles emit 9-15 times or even two orders of magnitude higher secondary organic particulate matter than primary organic particle mass (Karjalainen et al., 2016; Nordin et al., 2013; Platt et al., 2013; Tkacik et al., 2014). Indeed, Bahreini et al. (2012) found that ~~gasoline engine originated~~ secondary organic aerosol originating from gasoline engines forms the majority of the SOA in and downwind of large metropolitan areas. From diesel vehicles without a particle filter, the SOA mass formation potential is of the same magnitude as or lower than the primary particle mass emission (~~Weitkamp et al., 2007~~) (Jathar et al., 2017; Gordon et al., 2014b; Weitkamp et al., 2007).

Exhaust after-treatment can reduce ~~the~~ secondary aerosol formation potential from engine exhaust, especially ~~the~~ SOA formation potential. In general, diesel fuel has the strongest secondary organic aerosol formation potential amongst diesel, jet fuel, gasoline and Fischer-Tropsch from natural gas and coal (Jathar et al., 2013). However, diesel vehicles equipped with oxidation catalysts or catalytic particle filters have been reported to be minor secondary particle emitters (Chirico et al., 2010; Gordon et al., 2014b; Samy and Zielinska, 2010). In gasoline ~~engines, too,~~ engine functioning exhaust after-treatment can ~~reduce the also clearly reduce~~ secondary particle formation ~~clearly~~ (Karjalainen et al., 2016). The secondary aerosol precursor ~~emission emissions~~ of engines and vehicles are also strongly ~~depended~~ dependent on the driving conditions, which should be taken into account in emission comparisons.

For instance, Tkacik et al. (2014) showed that the secondary inorganic mass often exceeds the amount of the secondary organic aerosol in a highway tunnel, even by a factor of two. The main contributor to secondary inorganic aerosol in their study was ammonium nitrate ~~that,~~ which originates from NO<sub>x</sub> and ammonia emissions. According to ~~the study of~~ Karjalainen et al. (2016), large fractions of nitrate in the secondary inorganic particles ~~is are~~ characteristic for highway driving, and the inorganic species concentrations are relatively low when compared to the secondary organic aerosol formed during other parts of the New European Driving Cycle (NEDC) ~~that,~~ which they tested. ~~Another Idling is another~~ engine operation mode that can produce significant amounts of secondary inorganic aerosol from gasoline vehicle exhaust ~~is idling~~ (Nordin et al., 2013).

Natural gas usage as a fuel in combustion engines, both in energy production and traffic, is a growing trend worldwide. Natural gas engines emit little primary particle mass and less CO<sub>2</sub> than engines fueled with conventional fuels (Anderson et al., 2015; Bielaczyc et al., 2014) but their particle number emission can be significant (Hallquist et al., 2013; Jayaratne et al., 2010). In addition, the size of the majority of the ~~natural gas engine emitted particles~~ particles emitted by natural gas engines can be below the detection limits of traditional exhaust particle measurement devices (Alanen et al., 2015). Natural gas engine exhaust particles are highly volatile (Bullock and Olfert, 2014; Jayaratne et al., 2012) or they can consist of volatile matter condensed on non-volatile cores (Alanen et al., 2015; Graves et al., 2015; Pirjola et al., 2016). The evaporation of the parti-

cles is largest at temperatures below 100 °C (Alanen et al., 2015; Jayaratne et al., 2012). Primary particles from natural gas ~~engine engines~~ mainly consist of organic matter (Pirjola et al., 2016), but the composition depends on exhaust after-treatment (Lehtoranta et al., 2016). In the study of Lehtoranta et al. (2016), high catalyst temperatures were found to increase the fraction of sulfate in particles when a combination of oxidative and reductive catalysts was employed. Also, increased ammonium  
5 concentrations were found in particles at high catalyst temperatures.

To the authors' knowledge, there are no published studies on secondary particle formation from natural gas engine ~~emissionemissions~~, its chemical or physical properties or the effect of exhaust after-treatment on exhaust's secondary particle formation. ~~In this~~ Goyal and Sidhartha (2003) recorded a notable improvement in the air quality of Delhi when a portion of vehicles were changed to natural gas vehicles in 2001. In our study, the secondary aerosol formation potential of natural gas engine exhaust  
10 was investigated ~~by using~~ a flow-through reactor, and the chemical and physical characteristics of particles were investigated by aerosol instruments. The results were compared to ~~the primary particle emission those of primary particle emissions~~, but because the primary particle ~~emissionemissions~~ of the same engine ~~has have~~ already been discussed in two earlier publications (Alanen et al., 2015; Lehtoranta et al., 2016), ~~it is they are~~ not a focus of this paper. In general, ~~this study aims the aim of this study is~~ to report the total particulate emissions of natural gas engines, i.e., primary and secondary particles, to ensure that  
15 shifting ~~into to~~ natural gas from diesel and gasoline ~~does will~~ not cause unexpected environmental or health issues, and to define the possible benefits of the shift. Volatility studies on both primary and secondary particles enabled an evaluation of the stability and residence time of the particles in the atmosphere. The study of chemical composition can help solve their origin and find ways to reduce the particulate ~~emissionemissions~~.

## 2 Methods

### 2.1 Engine and after-treatment

~~The engine used was a retrofitted spark ignition natural gas engine using~~ A small (2.0 liter displacement) spark ignited passenger car engine was used for the measurements with Russian pipeline natural gas ~~with as fuel~~. The methane content of ~~the fuel was 97 % and sulfur content %~~, other hydrocarbon content was 1.6 % and nitrogen content was 0.9 %. The sulfur ~~content was~~ below 1 ppm ~~as fuel~~. The engine was run at two steady-state engine ~~driving operation~~ modes with torque ~~of~~ 70 Nm  
25 and speed ~~of~~ 2700 rpm (Mode 1, M1) and torque ~~of~~ 35 Nm and speed ~~of~~ 3100 rpm (Mode 2, M2). In ~~the~~ engine mode 2, short chain hydrocarbons were added into the exhaust ~~in order~~ to make it resemble the exhaust of a power plant NG engine. The ~~retrofitting~~ exhaust gas composition in two operation modes simulated typical natural gas power plant exhaust gas composition. The engine, natural gas and lubricating oil properties ~~, and the engine driving as well as the engine operation~~ modes have been described in more detail by ~~Murtonen et al. (2016), Alanen et al. (2015) and Lehtoranta et al. (2016).~~ Murtonen et al. (2016),  
30 Alanen et al. (2015) and Lehtoranta et al. (2016).

Two separate after-treatment systems were applied in the measurements, both consisting of a reductive and an oxidative section. The after-treatment has been described in more detail by Lehtoranta et al. (2016). The first catalyst (Catalyst 1, C1) consisted of only one reactor ~~that targeted both to~~, which targeted both oxidation of carbon compounds and ~~to~~ NO<sub>x</sub> reduction

with the use of ~~through~~ urea injection in the same catalyst reactor. The second catalyst system (Catalyst 2, C2) consisted of a palladium and platinum containing methane oxidation catalyst followed by urea injection and a vanadium-SCR catalyst, which catalysts were supported on metallic honeycomb substrates. ~~The catalyst~~ Catalyst 1 was used in three different exhaust temperatures in the range of 350-450 °C in order to study its performance and ~~its~~ influence on secondary particle formation potential of the engine exhaust. The temperature of the catalyst 2 was 500 °C. Catalyst performance depends on the exhaust temperature (e.g., Lehtoranta et al., 2016). By using the catalysts at different temperatures, effects of catalyst temperature on the formation and characteristics of primary and total aged particulate matter could be studied. The catalyst temperatures were measured upstream of the oxidation catalysts. The temperature prior to the SCR of catalyst 2 was approximately 50 °C lower than prior to the oxidation catalyst. The exhaust flow through the catalysts was kept constant at 80 kg h<sup>-1</sup> by leading only a part of the exhaust gas flow through them (Murtonen et al., 2016).

## 2.2 Instrumentation and data analysis

~~For~~ ~~The sampling system or~~ the particle measurement instruments, ~~the sampling system~~ consisted of a porous tube diluter (PTD, Mikkanen and Moisio 2001; Ntziachristos et al. 2004) with a dilution ratio (DR) of 6, followed by a residence time chamber with a residence time of 6 s. The dilution air was heated to 30 °C to achieve constant dilution conditions. A second dilution stage was carried out with an ejector diluter (Dekati Ltd.) with DR 4. The dilution ratio over the PTD was adjusted ~~by using~~ a bypass flow mass flow controller placed downstream the residence time chamber (Fig. 1). The dilution ratios were calculated from CO<sub>2</sub> concentrations in ~~the~~ raw and diluted exhaust ~~sample samples~~ and they could be used ~~for calculations of to~~ calculate tailpipe concentrations of particle emissions. The aerosol sampling was done downstream the exhaust after-treatment system.

A potential aerosol mass chamber (Kang et al., 2007, 2011; Lambe et al., 2011, 2015) was used to simulate the aging process of an aerosol in the atmosphere. In the PAM, an oxidative environment (O<sub>3</sub>, OH and HO<sub>2</sub>, UV-light) was produced ~~by using~~ two UV lamps emitting 185 nm and 254 nm radiation, respectively, in a small (13 l) flow-through chamber. The PAM chamber was placed between the two dilution stages, and the flow through it was a constant 5 liters per minute (residence time 156 s), measured by a bubble flow meter (Gilibrator, Sensidyne Inc.) and adjusted by a pressure regulator of the compressed air flow to ~~the~~ ejector diluter. The PAM chamber could be either bypassed or used ~~in order~~ to measure the properties of primary and secondary aerosols, respectively.

The approximate atmospheric age, i.e., ~~the~~ photochemical age simulated by the PAM chamber ~~UV-lights~~ UV lights, was modeled using the properties of the PAM chamber and the measured concentrations of gaseous components that cause external OH reactivity in the chamber. The model used for calculating the OH exposures was based on the degradation mechanism extracted from the Master Chemical Mechanism, ~~or~~ MCM v3.3.1, ~~(Jenkin et al., 1997, 2003; Saunders et al., 2003) via~~ (Jenkin et al., 1997, 2003; Saunders et al., 2003) via the website <http://mcm.leeds.ac.uk/MCM> and translated to Matlab code using ~~the Kinetic PreProcessor~~, Kinetic PreProcessor or KPP (Damian et al., 2002). The model has been tested against SO<sub>2</sub> reduction measurements in the PAM chamber.

MCM is a near-explicit chemical mechanism ~~describing that describes the~~ atmospheric degradation of volatile organic compounds in gas phase. MCM describes the degradation of a given VOC through different generations of products until ~~ultimately~~ ultimately CO<sub>2</sub> is ultimately formed. It contains about ~~17 000 reactions for 6 700~~ 17000 reactions for 6700 different species. (Jenkin et al., 1997, 2003; Saunders et al., 2003). To be able to use these mechanisms with the PAM chamber, the photolysis rates have been calculated for ultraviolet light with wavelengths of 185 nm and 254 nm. The absorption cross section and quantum yield values needed for this are IUPAC recommendations (Atkinson et al., 2007) supplemented with the JPL data evaluation number 18 (Burkholder et al., 2015), when necessary. Some photolysis reactions relevant that are relevant to the PAM chamber ~~;~~ but missing from the tropospheric MCM schemes ~~;~~ have also been added.

KPP is a software tool for translating kinetic chemical mechanisms into Fortran77, Fortran90, C ~~;~~ or Matlab simulation code. The generated code produces concentrations of each species present as a function of time (Damian et al., 2002). For the model used, the KPP source code ~~has been was~~ modified to fix certain conflicts ~~with involving~~ with involving the MCM mechanism and the photolysis rate calculations written for the PAM chamber ~~;~~ as well as to allow large chemical schemes typical to MCM.

In this paper, we describe the PAM OH exposure as photochemical age, which is the equivalent time in the atmosphere in which the sample would reach the same OH exposure as in the PAM chamber. Thus,

$$\text{Photochemical age (days)} = \frac{\text{OH exposure}}{1.5 * 10^6 \text{ molec. cm}^{-3}} \frac{1}{3600 \text{ h}^{-1} \text{ s} * 24 \text{ d}^{-1} \text{ h}}, \quad (1)$$

where  $1.5 * 10^6 \text{ molec. cm}^{-3}$  is the average OH concentration in the atmosphere (Mao et al., 2009).

Relative humidity (RH) was measured downstream of the PAM chamber. The RH was high, about 80 %, due to the low primary dilution ratio that was applied during the experiments. The high RH of the sample complicated the evaluation of the PAM background mass levels ~~;~~ i.e., the particulate mass that was generated by only compressed air and UV lights ~~;~~ because the high RH could not be reproduced in the compressed air by the available instrumentation. The background levels were measured using both dry compressed air and compressed air with RH ~30 %.

NO<sub>x</sub> concentration was measured ~~by with~~ with a chemiluminescence detector (CLD), CO and CO<sub>2</sub> concentrations in raw exhaust ~~by were measured with~~ with a non-dispersive infrared (NDIR) analyzer and CO<sub>2</sub> ~~concentration concentrations~~ in diluted exhaust ~~by were measured with~~ with a Sick Maihak SIDOR gas analyzer. Water, methane, NH<sub>3</sub>, HNCO and the ratio of NO and NO<sub>2</sub> were measured ~~by with~~ with a Fourier transform infrared spectroscopy (FTIR, Gasetmet Cr-2000) analyzer, and methane, ethane, propane and ethylene were measured ~~by with~~ with a gas chromatograph (GC).

Aerosol instruments covered a large range of particle mobility and aerodynamic size ~~range and measurements of chemical composition of the particles. For the measurements of particle number, mass and size, an as well as measurements of the particles' chemical composition. An~~ engine exhaust particle sizer (EEPS, TSI Inc., Mirme 1994) and a high-resolution low-pressure impactor (HRLPI, Arffman et al. 2014) were employed, both on one-second time resolution, to measure the particle number, mass and size. The EEPS measures the size distribution and concentration of particles with a mobility diameter of 5.6-560 nm ~~and HRLPI,~~ and the HRLPI measures the aerodynamic size distribution of particles with diameter of ~5-200 nm.

~~With an assumption of~~ The mass of the particles was calculated under assumptions of unit density and spherical particles, ~~the mass of particles was calculated.~~ EEPS default inversion was applied.

A soot particle aerosol mass spectrometer (SP-AMS, Aerodyne Research Inc., US) ~~;~~ a combination of a ~~high-resolution time-of-flight~~ high-resolution time-of-flight aerosol mass spectrometer and a single particle soot photometer (Droplet Measurement Technologies) ~~measured~~ was used to measure the chemical composition and oxidative state of the aerosol sample.

5 The SP-AMS measures both refractory and non-refractory particulate matter. It operated in V-mode ~~;~~ with ~~with a~~ one-minute time resolution, measuring half of the time in mass spectra (MS) mode and the other half in particle size (pToF) mode. Both laser and tungsten vaporizers were used. The collection efficiency applied in the calculations was ~~0.5~~ calculated using the ~~the parametrization by Middlebrook et al. (2012).~~ The CO<sub>2</sub> gas interference in the AMS data was corrected by using the CO<sub>2</sub> concentrations measured with Sick Maihak SIDOR gas analyzer. The impact of ammonium nitrate interference on CO<sub>2</sub><sup>+</sup>, O/C  
10 and H/C ratios was evaluated to be small (less than 5 % for O/C and H/C; Pieber et al. 2016). Therefore, a correction of ammonium nitrate interference was not applied for organics or O/C data.

Volatility measurements were made with a thermodenuder described in the publication by Heikkilä et al. (2009). When the remaining mass of particles was measured ~~in as a~~ function of TD temperature, the thermodenuder was heated up to 265 °C and then switched off, with the sample flow still flowing through it. The decreasing temperature was recorded for at least half an  
15 hour until the temperature was below 50 °C.

Emission factors were calculated from fuel composition and engine performance information. Residual O<sub>2</sub> in the exhaust was 6.2-6.3 %, the power of the engine was 12 kW and 20 kW and the combustion air flow into the engine ~~were was~~ approximately 100 and 115 kg h<sup>-1</sup> ~~at the in~~ engine modes 1 and 2, respectively. Calculated from the fuel composition information, the emission factor for CO<sub>2</sub> EF<sub>CO<sub>2</sub></sub> was 2730 g kg<sub>fuel</sub><sup>-1</sup>, and the carbon intensity was 0.74 kg<sub>C</sub> kg<sub>fuel</sub><sup>-1</sup>.

## 20 3 Results and discussion

### 3.1 Secondary particle formation and chemical composition

The concept “total aged” here comprises all particle mass measured downstream of the PAM chamber, i.e., both primary and secondary particle mass. In general, primary particle mass has not been subtracted from the mass measured downstream of the PAM (~~Total~~ total aged) to calculate the secondary particle mass separately because ~~it doing so~~ would have created inconsistency  
25 in representation of the results ~~since e.g.,~~ since, for example, particle size distributions or volatility behavior cannot be presented in this way. For the same reasons, the PAM background mass ~~;~~ i.e., the particle mass generated in the PAM chamber from clean compressed air — has not been subtracted ~~;~~ but is instead presented separately in the supplementary section of this paper. To enable a comparison to literature, an exception is made when presenting secondary particle production factors.

Figure 2 contains particulate mass measurement results derived from the three aerosol instruments. The chemical compositions from SP-AMS are also presented. The cases (engine mode, catalyst ~~;~~ and catalyst temperature) included in this paper ~~have~~  
30 ~~been selected to be representative and~~ cover all of the tested exhaust temperatures and both engine operation modes, and they have data collected with all available instruments ~~at both of both the~~ primary and total aged aerosol measurements. In most cases



in our measurements, primary exhaust particle mass concentrations from the natural gas engine were close to the detection limits of the instruments EEPS, HRLPI and SP-AMS (Alanen et al., 2015; Lehtoranta et al., 2016). Exceptions were made by the high temperature catalyst cases (M2, C2, 500 °C and M2, C1, 450 °C) where during which more primary particle mass formed was formed, especially on the size ranges of the HRLPI and EEPS: a high catalyst temperature favors the conversion of SO<sub>2</sub> into SO<sub>3</sub> and further into sulfuric acid that, which can nucleate and condensate-condense on existing particles in the sampling process or when released into the atmosphere (see e.g. Arnold et al., 2012; Rönkkö et al., 2013)(see, e.g., Arnold et al., 2012; Rönkkö et al., 2013)

5 The primary particle formation phenomena and concentrations have been discussed in more detail in Lehtoranta et al. (2016) while this paper focuses on secondary aerosol formation and the total aged particle emissionemissions.

The formed secondary particle mass concentrations were found to be on a significantly high level significantly high in comparison with the primary particle mass emissionemissions. In all of the investigated cases, particle mass increased when the sample was led through the PAM chamber. The increase in mass could be magnitudes larger than the primary particle mass emission (Table 1). The relative increase in mass in the PAM chamber could not be specified for all of the HRLPI measurements because of the very low primary particle mass. Total The total aged aerosol mass produced by natural gas engine exhaust was 0.89-2.3 0.99-2.6 mg m<sup>-3</sup> according to SP-AMS, leading to secondary mass production of 0.86-2.29 0.96-2.5 mg m<sup>-3</sup>.

10

The secondary aerosol formation ratio, i.e., the ratio of the total aged particulate mass and to the primary particulate mass ratio was lower in the cases that already produced more primary particle mass, i.e., in the cases with a high catalyst temperature. It is possible that the if the catalyst conditions are favorable, the particulate matter that would otherwise condense on particles in PAM chamber, or later on in the atmosphere when real-world emission is in question, the PAM chamber condenses on particle phase already in the cooling and dilution process if the catalyst conditions are favorable. I.e., In other words, if the catalyst oxidizes the gases sufficiently oxidizes the exhaust gases, thus lowering their saturation vapor pressure and allowing them to, they condense or nucleate already when released into the from the tailpipe and not later on in the atmosphere. A high catalyst temperature promoted larger total aged aerosol formation according to, according to the EEPS and HRLPI measurements. However, the SP-AMS total aged mass concentrations of the SP-AMS did not increase with an increasing catalyst temperature as catalyst temperature increased. The differences of instruments showing in instrument's showings are discussed in Sect. 3.3. Also, the variation in the atmospheric ages increases uncertainty in the comparison of the catalyst temperature on secondary

15

20

25 aerosol formation potential.

The total aged aerosol of the natural gas engine exhaust consisted of both organic and inorganic matter at the tested operating conditions (Fig. 2, Table 1). Approximately half of the total aged aerosol particle mass detected by SP-AMS consisted of organic matter. The fraction of sulfate and nitrate was measured to be 34-49 % in total, with their ratio depending on the case, and the fraction of ammonium varied between 10-15 %. Link et al. (2017) found that even high NO<sub>x</sub> emissions can produce negligible amounts of secondary nitrate aerosol if related ammonia emissions are small. Because secondary ammonium nitrate aerosol formation is limited by ammonia, its formation is probably more related to the exhaust after-treatment than the fuel. The exact ammonia concentrations in the raw exhaust cannot be given because they were below the instrument detection limit 2 ppm. According to these measurements, also low ammonia emissions may have atmospheric importance as secondary inorganic aerosol precursors.

30

35 The organic fraction of the total aged aerosol consisted of hydrocarbon fragments ( $C_xH_y$ ), fragments with one oxygen atom ( $C_xH_yO$ ) and fragments with more than one oxygen atom ( $C_xH_yO_{z,z>1}$ ); there was little or no  $C_xH_yN$  fragments (hydrocarbons with nitrogen) in the total aged particles. The main secondary organic ions detected by the SP-AMS were  $CO_2^+$ ,  $CHO^+$  and  $C_2H_3O^+$ . The composition of the organic aerosol was similar in all of the cases: the  $C_xH_yO_{z,z>1}$  group was the largest, followed by  $C_xH_y$  and  $C_xH_yO$ . The source of the secondary organic aerosol could be either the natural gas or  
5 the lubricating oil. ~~We, however,~~ However, we are not able to tell the source based on these measurements. The fuel mainly consisted of light hydrocarbons that are unable to form secondary organic aerosol (e.g., Seinfeld and Pandis, 2016, pp. 575). For example, Thiruvengadam et al. (2014); Eichler et al. (2017) have suspected engine lubricating oil to be responsible for a large portion of engine emitted particles. Therefore, we believe that also lubricating oil is a potential candidate for the source of secondary aerosol.

10 The O/C ratios of the total aged aerosol measured by SP-AMS were between 0.9 ~~-1.2~~ and 1.2. The O/C ratio of the primary aerosol in the case with the largest concentration was slightly smaller (1.1) than the O/C ratio of the total aged aerosol in the same case (M2, C2, 500 °C). In all of the other primary aerosol measurements, the particle mass concentrations in the sample were too low for O/C ratio analysis. In comparison with a secondary aerosol emission study ~~for on~~ gasoline engines by Karjalainen et al. (2016), the observed O/C ratios in the total aged aerosol from the PAM chamber were rather high.

15 ~~The simulated atmospheric, or photochemical, ages in the investigated cases varied between 4.6-10.7 days, depending on the external OH reactivity that was affected by the concentrations of gaseous emissions (Table 1) entering the PAM chamber and by the relative humidity of the sample. In the study of Tkacik et al. (2014), the peak secondary aerosol production took place after 1-1.5 days of equivalent atmospheric oxidation ( $OH=1.5*10^6$  molec.  $cm^{-3}$ ) when a vehicle fleet emissions in a highway tunnel was studied, and larger OH exposures started to reduce the secondary mass. In our study, the largest total aged~~  
20 ~~particle concentrations were achieved with the longest atmospheric ages that were simulated by the PAM chamber and the lowest with the shortest atmospheric ages. However, the secondary aerosol formation potential can have been affected also by the engine parameters, not only the achieved photochemical age: the total aged particle concentrations were the highest on the engine operation mode 2 (M2). The variation in the atmospheric ages increases uncertainty in the case to case comparison of the gained results of secondary aerosol formation potential.~~

25 Emission ~~emission~~ factors or secondary aerosol production factors in different units can be calculated from the presented particle mass concentrations ~~with use of~~ by using the following factors. If a unit factor  $mg\ kg_{fuel}^{-1}$  is needed ~~a factor 20.6~~, a factor of ca. 22  $m^3\ kg_{fuel}^{-1}$  can be applied to multiply the particle concentration (Calculation e.g. in Jathar et al., 2017; Gordon et al., 2014b). In order to obtain emission and production factors in unit  $kWh^{-1}$ , a factor  $2.7\ m^3\ kWh^{-1}$  (Mode 1) or  $4\ m^3\ kWh^{-1}$  (Mode 2) can ~~be similarly~~ similarly be used. These factors are derived from the fuel composition and engine performance information  
30 provided in Sect. 2.1 and 2.2 and the exhaust  $CO_2$  concentration.

The production factors of secondary organic aerosol have been calculated and collected in Table 2, in unit  $kg_{fuel}^{-1}$ . To be able to compare the SOA production factors, here primary organic aerosol ~~has been~~ was subtracted from the total aged organic aerosol. Table 2 ~~contains also~~ also contains SOA production factors of secondary organic aerosol for different diesel and gasoline vehicles obtained from the literature. Although the total aged particulate matter production of the investigated NG

35 engine was much larger than its primary particle emissions, ~~they were smaller or on the similar level with SOA production~~  
~~both from it was smaller than SOA production from in-use~~ diesel and gasoline ~~engines-vehicles~~ in the literature. ~~For example,~~  
~~the~~ (Tkacik et al., 2014). The SOA formation potential from the NG engine, measured by SP-AMS, was similar to that ~~from~~  
~~of~~ a diesel vehicle equipped with a catalytic converter or to that ~~from-of~~ a hot start gasoline vehicle. On the other hand,  
the photochemical age that was simulated by a chamber in the different studies, ~~varied a lot~~ varied greatly. This is why the  
5 comparison of the SOA production factors should be done ~~carefully~~ very carefully, if at all. The longest atmospheric ages in the  
literature collected in Table 2 were achieved in our study.

Palm et al. (2016); Tkacik et al. (2014); Kang et al. (2011) have seen with an oxidation flow reactor — such as the PAM  
chamber in our experiments — the highest potential secondary organic aerosol formation takes place at photochemical age  
of a few days and starts decreasing after that. For example, in the vehicle fleet emission study in a highway tunnel of  
10 Tkacik et al. (2014), the peak secondary aerosol production took place after 4-10 days of equivalent atmospheric oxidation  
([OH]=1.5\*10<sup>6</sup> molec. cm<sup>-3</sup>), and larger OH exposures started to reduce the secondary mass. In our study, the simulated  
atmospheric, or photochemical, ages in the investigated cases varied between 4.6 and 10.7 days, depending on the external  
OH reactivity, which was affected by the concentrations of gaseous emissions (Table 1) entering the PAM chamber and by  
the relative humidity of the sample. The largest total aged particle concentrations were achieved with the longest atmospheric  
15 ages and the lowest particle concentrations were achieved with the shortest atmospheric ages. However, the secondary aerosol  
formation potential may have also been affected by the engine parameters and not only the achieved photochemical age: the  
total aged particle concentrations were the highest in engine operation mode 2 (M2).

### 3.2 Volatility of primary and secondary particle mass

The volatility of the particles was studied with a thermodenuder. Mass fraction remaining (MFR) stands for the fraction of the  
20 particle mass at a given thermodenuder temperature and the particle mass at room temperature. In Fig. 3, the particle mass  
fraction remaining has been calculated for two representative cases of primary ~~emission-emissions~~ and four representative  
cases of total aged particle ~~emission, selected amongst emissions, selected from among~~ the cases already introduced. Figure 3  
~~shows data only from EEPS~~ only shows data from EEPS, since the curves obtained from HRLPI were similar. Here, the curves  
have been smoothed by a moving average but the original one-second-resolution figure can be found in the supplementary  
25 section. For the total aged ~~emission-emissions~~, the cases with both higher and lower catalyst temperature are presented. For  
primary particle ~~emission-emissions~~, only the case with the higher catalyst temperature is presented. This is because an accurate  
examination of the volatility of primary particles ~~on-in~~ low catalyst temperatures ~~cannot have been done~~ could not be done,  
due to the ~~too low-insufficient~~ primary particle mass concentrations for high-quality analysis. In the figure, the “starting point”, i.e.  
the temperature where the mass fraction remaining is one, is 50 °C and not lower because of the decelerated cooling of the  
30 thermodenuder ~~towards-toward~~ the room temperature and related time limitations.

The MFR curves for each type of particles are characteristic, i.e., each particle type can easily be distinguished by their  
evaporation behavior. To highlight this, the primary particle evaporation is marked with black, and the total aged particle  
evaporation curves are marked with cyan and blue in Fig. 3. The volatility of the particles from the natural gas engine clearly

~~changes changed~~ when the particles ~~are were~~ aged. At high catalyst temperature, ~~the~~ primary particles (black triangles in Fig. 3) ~~are were~~ more volatile than the total aged particles (cyan squares). Approximately half (46-60 % in EEPS, 43-53 % in HRLPI) of the total aged particle mass remained at ~~thermodenuder temperature a thermodenuder temperature of~~ 250 °C, whereas only 5-10 % (1-4 % in HRLPI) of the primary particle mass remained at that temperature.

Also the catalyst temperature had an impact on the volatility of the total aged particles (blue vs. cyan). ~~There was an An~~ easily evaporable fraction of the total aged particles ~~that were was~~ formed in the case of a low catalyst temperature. ~~The easily evaporable fraction, which~~ evaporated below 110 °C. Because of this easily evaporable fraction, the MFR of total aged particles at 250 °C was 30 % in the low catalyst temperature cases, while in the high catalyst temperature cases the MFR of total aged particles at 250 °C was 46-60 %.

The thermodenuder used in this study has been designed to minimize nanoparticle losses by reducing the residence time (Heikkilä et al., 2009). For example, in this study, the residence time in the heated zone of the thermodenuder was less than one second. An et al. (2007) measured ~~oxidated the volatility of secondary organic aerosol produced during~~  $\alpha$ -pinene ~~partieles photo-oxidation~~ and observed that only half of the secondary particle mass evaporates in a thermodenuder (100 °C) if the residence times in the heated zone of the thermodenuder are less than a few seconds. With ~~a~~ longer residence times, the remaining mass downstream ~~of~~ the thermodenuder decreases to less than three percent. This means that the remaining fraction of particle mass in our study could have been smaller with longer residence times in the thermodenuder. On the other hand, a longer residence time in the thermodenuder would have increased the nanoparticle losses. In this study, with the use of a thermodenuder, we could observe the volatility differences between the different types of particle emissions emitted by a natural gas engine.

In Fig. 4 the remaining mass fractions are plotted for different chemical species of the particles drawn from the SP-AMS. In the primary emission case, approximately one third of ~~particle mass, the particle mass~~ — consisting mainly of organics, — remained at TD temperature ~~of~~ 250 °C. The low concentrations and particle size below the detection limit of SP-AMS ~~degrades degrade~~ the analysis in the case M2, C1, 450 °C, ~~which was~~ seen as a fluctuating signal. ~~In high catalyst temperature cases about~~ About 25 % of the total aged particle mass ~~and in low in the high~~ catalyst temperature cases ~~and~~ less than 10 % of the total aged particle mass ~~in low catalyst temperature cases~~ remained at 250 °C, according to SP-AMS. The remaining particle matter consisted of organics, sulfate and ammonium, in this order.

~~Composition~~ ~~The composition~~ information reveals that the high-volatility fraction of the total aged particles in ~~the~~ low temperature catalyst cases consisted of nitrates, possibly of ammonium nitrate, and high-volatility organics. ~~Primary~~ ~~The primary~~ particle sulfate evaporated at thermodenuder temperatures between 100-170 °C, and the total aged particle sulfate ~~above 160~~ ~~evaporated more gradually above~~ 120 °C. In all types of particles, the evaporation of organics was steady and gradual below 200 °C, indicating various organic compounds with different evaporation temperatures. Above 200 °C, the evaporation of organics decreased. This combined SP-AMS and EEPS/HRLPI derived thermodenuder temperature ramp information can be used in future measurements for particle composition analysis: ~~the~~ ~~The~~ evaporation temperature of the particles can give valuable information ~~of about~~ the composition of the particles also without an access to SP-AMS.

The temperatures ~~where at which~~ 50 % of the volatile fraction of the chemical compounds of the particles ~~are were~~ remaining  
35 are collected in Table 3. The case “Primary, M2, C1, 450 °C” had ~~too low~~ particle mass concentrations ~~that were too low~~ (See  
Fig. 4) for this kind of examination. The evaporation ~~temperature~~ ~~temperatures~~ of sulfate and nitrate were the highest and  
the lowest, respectively, in all ~~of the~~ analyzed cases (all catalyst temperatures, ~~;~~ primary and total aged particles). Similarly  
to Huffman et al. (2009), ~~who measured ambient aerosol volatility in megacities with a thermodenuder and an SP-AMS, we~~  
found that nitrate ~~has had~~ the highest volatility and sulfate ~~had~~ the lowest.

5 Robinson et al. (2007) and Huffman et al. (2009) ~~propose~~ ~~proposed~~ that all organic aerosol should be considered ~~as~~-semivolatile.  
Our results on primary and PAM chamber generated organic aerosols point ~~to in~~ that direction as well. The evaporation temper-  
ature of the volatile fraction ( $T_{\text{volatile, 50\%}}$ ) of organic matter lay between the  $T_{\text{volatile, 50\%}}$  of nitrate and sulfate in all cases. Also,  
a significant fraction of the mass concentration of the organic matter did not evaporate. More exact ~~specification~~ ~~specifications~~  
of the volatility cannot be given, but there is room left for speculation if ~~a~~ part of the organic matter in secondary particles is  
10 SV-SOA or LV-SOA (Murphy et al., 2014).

The ~~evaporation of~~ ammonium in total aged particles ~~took place~~ ~~evaporated~~ at higher thermodenuder temperatures when  
the catalyst temperature was high. The theory that the sulfate-nitrate trade-off phenomenon that determines the formation of  
nitrates is ammonium-bound is supported by the evaporation temperatures of ammonium. Ammonium ~~was evaporated at over~~  
~~50~~ ~~evaporated at approximately 20~~ °C higher thermodenuder temperatures in the high catalyst temperature cases (Table 3);  
15 ~~thus; thus~~, its evaporation temperature was closer to the evaporation temperature of sulfate when the sulfate concentration  
of the particles was larger. By contrast, in the low catalyst temperature cases where the nitrate concentration was higher, the  
evaporation temperature of ammonium was closer to that of nitrate.

The nitrate concentrations ~~that were~~ measured during the thermodenuder temperature ramp (Fig. 4) in low thermodenuder  
temperatures ~~differ~~ ~~differed~~ from the nitrate concentrations that were measured without a thermodenuder (Fig. 2 a+b) in total  
20 aged particles. A possible explanation is ~~that~~ a long time ~~is~~ needed for the ~~stabilization of the nitrate concentration~~ ~~nitrate~~  
~~concentration to stabilize~~. In our measurement protocol, ~~we waited~~ 10-15 minutes ~~was waited~~ after switching the PAM UV-  
lights on, followed by a 10-minute steady-state measurement with the aerosol instruments. After this, ~~a thermodenuder ramp~~  
~~;~~ ~~that was started, which~~ took approximately 45 minutes, ~~was started~~. Based on the results, the 10-15-minute wait was insuf-  
ficient if accurate nitrate concentrations were desired. Therefore, the chemical compound measurements performed ~~on at~~ low  
25 thermodenuder temperature can give a truer picture of the secondary aerosol formation than the measurements presented in  
Fig. 2. The change in concentrations between the steady-state measurements and the thermodenuder ramp measurements ~~is~~  
~~was~~ the largest for nitrate ~~but also~~, ~~but~~ the concentrations of other compounds ~~slightly differ~~ ~~also differed~~ ~~slightly~~ from each  
other. Because the nitrate concentrations were found to be the slowest to stabilize and the most sensitive ~~on to~~ changes in the  
system, such as ~~to changes in~~ temperature, special attention should be ~~paid on~~ ~~given to~~ measurements of nitrate, especially  
30 when a PAM chamber is being used. ~~We note that because nitrate formation is limited by ammonium, the slow stabilization is~~  
~~probably related to ammonia.~~

According to our thermodenuder temperature ramp experiments, the catalyst temperature affected ~~the~~ total aged particle  
composition. With a decreasing catalyst temperature, the mass concentration and fraction of sulfate in total aged particles

decreased (Fig. 4, Table 1). This was expected: at lower catalyst temperatures the oxidation of SO<sub>2</sub> to SO<sub>3</sub> decreases and less sulfuric acid (sulfates) can form (Arnold et al., 2012). The mass fraction-concentration of nitrate in secondary particles increased with a decreasing catalyst temperature as the catalyst temperature decreased. This could not be explained by catalyst performance improvement: gaseous NO<sub>x</sub> levels remained similar in-at all catalyst temperatures or rose with an increasing catalyst temperature (see Lehtoranta et al., 2016). Sulfate concentrations, however, could as catalyst temperature increased (see Lehtoranta et al., 2016). Because ammonia concentrations after catalyst were low, below 2 ppm in all cases, the effect of catalyst temperature on ammonia emission could not be measured. However, ammonium concentrations measured by SP-AMS correlated rather well with nitrate concentrations. Therefore, we suggest that ammonium increase was related to the nitrate increase. Also the sulfate concentrations could partly explain the behavior of nitrate concentrations: the nitrate concentrations. If enough gaseous sulfuric acid is available, ammonium sulfate forms, and if not, more ammonium nitrate can form instead. Similar behavior of nitrate and sulfate trade-off has been measured by Ntziachristos et al. (2016) for two different marine fuels, namely heavy fuel oil (HFO) and light fuel oil (LFO).

### 3.3 Differences between instruments and mass size distributions

Slightly unexpectedly, the total aged particle mass measured by SP-AMS was 2-4 times larger than the total mass measured by EEPS and 1-3 times larger than that measured by HRLPI (Fig. 2). There could be several reasons for that this. In EEPS and HRLPI, unit density and spherical particles have been were assumed in the mass calculations. Natural gas engine primary particles have density-a density of 0.85 g cm<sup>-3</sup> (Bullock and Olfert, 2014), but the densities of natural gas engine secondary particles can be larger than the unit density. For example, the density of ammonium nitrate, ammonium sulfate and sulfuric acid are-is approximately 1.5, 1.5 and 1.8 g m<sup>-3</sup>, respectively (Clegg and Wexler, 2011). Particle density does not completely explain the difference in instrument readings totally. Also, the collection efficiency (CE) estimation used in SP-AMS calculation is probably not the reason for differences between the differences between the instrument results in this study. Evaluation of the CE following the procedure of Middlebrook et al. (2012) reveals-revealed that CE = 0.5 is a good estimation 0.45 was the correct value for the studied total aged particles -in the cases in Figure 1.

However, the detection efficiency and size range vary-between-varied among the aerosol instruments (EEPS 5.6-560 nm, HRLPI ~5-200 nm, SP-AMS ~30-1000 nm) and can explain the differences in results; HRLPI can detect a larger fraction of the primary particles than SP-AMS because of the more suitable size range of the instrument and, correspondingly, SP-AMS can detect a larger fraction of the total aged particles formed in the PAM chamber because of its more suitable size range. Also, particle losses may play a role in the differences between instruments; particle losses in the PAM chamber were larger in the HRLPI size range than in the SP-AMS size range. Nevertheless, most probably, the largest role was played by the differences in instrument size ranges.

In Fig. 5, mass size Mass size distributions of EEPS and HRLPI are plotted -HRLPI suggests-in Fig. 5. HRLPI suggests that a part of the particle mass to-lie-lies above the instrument size range, which is-was confirmed by SP-AMS mass size distributions in Fig. 6. According to SP-AMS, the mass size distributions of total aged particles are bimodal, were bimodal, with the size of the larger mode being at-480-840 nm and the smaller at-being 150-200 nm. However, although The mode

with smaller particle size was dominated by organics. Although the mass concentration of the total aged particles is better recorded by SP-AMS, a part-portion of the particles on the smallest particle sizes is missed due to the lower limit of SP-AMS size range at 30-50 nm. The best overall picture of is therefore gained with a combination of SP-AMS and HRLPI. See supplement for a comparison of the size distributions measured by different instruments in a same figure. The two instruments that measure the aerodynamic diameter of the particles (HRLPI and SP-AMS) compare quite well with each other in the size range 47-124 nm.

5 We can also see a difference between the EEPS and HRLPI mass size distributions. The difference is probably due to the inversion of EEPS that, which forces the size distributions to follow a log-normal shape. EEPS also underestimated the mass of particles with diameter above 200 nm (see supplement). The different measurement principle-principles of the instruments must also be kept in mind. EEPS measures the mobility size and HRLPI measures the aerodynamic size of the particles.

### 3.4 PAM artifacts and losses

10 So called smog chambers are an established method of measuring SOA formation. An oxidation flow chamber such as PAM provides some advantages in comparison to smog chambers, such as higher degree of oxidation, smaller physical size and a short residence time, which allows measurements with higher time resolution. Smog chamber walls may cause also large wall losses and influence the chemistry in the chamber (Bruns et al., 2015). On the other hand, smog chambers may simulate atmospheric oxidation of organic precursors better than oxidation flow chambers due to their more tropospheric oxidant concentrations and longer residence times (Lambe et al., 2011).

15 PAM method has been designed to produce the maximum potential aerosol mass from precursor gases (Kang et al., 2007). In that stage, the oxidation products of precursors have condensed to particle phase and formed secondary aerosol. However, because the oxidant concentrations are unrealistically high in PAM, the UV light intensity used is non-tropospheric and the residence times are much shorter than in atmosphere (e.g., Simonen et al., 2017), precursor oxidation products have also other possible fates; they can be oxidized too far and form non-condensable oxidation products before condensation (accelerated chemistry) and they can exit the reactor before the condensation occurs. Also, precursor oxidation products can be lost on the PAM walls although the losses on the walls are minimized by the chamber design (Lambe et al., 2011). These other fates than condensing on particle phase are viewed here as PAM artifacts and losses.

25 The losses of condensable organic oxidation products and artifact effects of the accelerated chemistry in the PAM have been evaluated following the method of Palm et al. (2016) for the cases in Figure 2. HRLPI number size distributions were used to calculate the condensation sink needed in the loss calculation. Molar mass of 200 g mol<sup>-1</sup>, diffusion coefficient of 7\*10<sup>-6</sup> m<sup>2</sup> s<sup>-1</sup> (Tang et al., 2015) and rate constant for reaction with OH of 1\*10<sup>-11</sup> (Ziemann and Atkinson, 2012) were applied. For sticking coefficient selection  $\alpha = 1$  (assumed by Palm et al. 2016), the fraction of oxidation products condensed on particle phase was  $0.94 \pm 0.03$ , but for  $\alpha = 0.1$  the fraction of oxidation products condensed on particle phase was  $0.64 \pm 0.15$ .

30 The losses of sulfuric acid were also calculated in the same way. Diffusion coefficient of 1\*10<sup>-5</sup> (Hanson and Eisele, 2000),  $\alpha$  of 0.65 (Pöschl et al., 1998) and molar mass of 98.079 g mol<sup>-1</sup> were used for sulfuric acid. The fraction of sulfuric acid that condensed on particle phase was  $0.98 \pm 0.01$ . According to Lambe et al. (2011), SO<sub>2</sub> losses in the PAM are negligible.

It can be concluded that the effect of precursor losses and artifacts in the PAM was not substantial in our measurements. The measurement of ammonium nitrate and ammonium sulfate is difficult because ammonia sticks on the walls of sampling systems and instruments (Suarez-Bertoa et al., 2015; Heeb et al., 2012, 2008), which may result in wall losses or an artifact on subsequent measurements. The penetration of ammonia could not be calculated, but the measured ammonium concentrations varied clearly from one case to another, implicating that the source of the ammonia was indeed the exhaust line instead of e.g., the walls of the PAM. However, longer times for stabilization of the SP-AMS concentration would have been advantageous for the reliability of ammonium, and as a consequence, nitrate particle formation.

Karjalainen et al. (2016) and Timonen et al. (2017) estimated the effect of particle losses in a similar PAM chamber to be small. The particle losses measured by Karjalainen et al. (2016) depend on particle size and are below 10 % at the particle sizes with most particle mass. An exact calculation of the particle losses in the PAM chamber is not possible because the particle size and number increase while the aerosol sample flows through the chamber. An estimation for the particle mass losses in the chamber can be given, calculated using the average of HRLPI particle number size distributions before and after the chamber (similarly to the precursor-loss calculation by Palm et al., 2016) and the PAM particle loss curve. The particle mass loss according to this examination was  $20.3 \pm 3.7$  %. Most probably, however, the actual particle mass losses in the chamber were smaller because majority of the mass actually was located at larger particle sizes that HRLPI is unable to measure, where particle losses are smaller.

No loss corrections were done based on these calculations on the results presented in this article. If corrections had been made, the presented secondary aerosol productions and production factors would be slightly higher (less than 10 %) in Figures 2 and 4-6, and in Tables 1 and 2.

#### 4 Conclusions

Natural gas engines emit very little particle mass, which can make them less harmful ~~on-to~~ human health than ~~gasoline-or diesel-fueled-corresponding gasoline-, diesel- or marine-fuel-oil-fueled~~ engines. However, ~~also~~ secondary aerosol formation ~~also~~ increases human exposure to aerosol particles. When natural gas engines become more common in traffic and energy production, ~~also-their-their potential for~~ secondary particle formation ~~potential-becomes-will become~~ more important and an even more relevant object for research. Therefore, the potential reduction of the total aerosol particle mass and related health and climate effects when ~~shifted-shifting~~ from liquid fuels to natural gas or biogas in combustion engines is important.

In this study, a retro-fitted natural gas engine equipped with exhaust after-treatment was studied in a laboratory in an engine test bench, using steady-state engine operation modes, i.e., constant engine speed and torque. The secondary aerosol formation was studied using a potential aerosol mass (PAM) chamber. Estimates for the atmospheric ages achieved by the PAM chamber were 4.6-10.7 days. In this study, the secondary aerosol mass potential of natural gas emission was measured to be ~~on-at~~ a small or medium level, but well measurable. Compared to the primary particle mass emissions ~~of-from~~ the same engine, the secondary aerosol formation potential was substantial ~~:-~~ approximately one to two orders of magnitude higher than the primary aerosol mass. However, the very small primary particle masses in some of the observed engine and catalyst operation



5 modes complicated this ~~kind of comparison. In comparison with diesel and gasoline fueled vehicles, the secondary organic aerosol formation potential was small or moderate, depending on the fuel and the exhaust after-treatment of the reference. The comparison. To estimate the quantity of the NG engine exhaust's~~ SOA formation potential, ~~it~~ was on the same level ~~as~~ or lower than the SOA formation potential of a diesel vehicle equipped with an oxidation catalyst or that of warm (hot start) gasoline vehicles. However, the photochemical age that was produced by the PAM chamber in our study was longer (~~several days~~) than the photochemical ages achieved in the previous studies (~~several hours~~). ~~Therefore, the SOA formation potential must not be directly compared. Also, despite the attempts to model PAM related losses and artifacts and to estimate particle losses in PAM, the measurements performed with PAM still involve uncertainties. In our study, the largest SOA mass was produced with the longest photochemical ages.~~

10 The total aged aerosol, i.e., ~~the~~ combined primary and secondary aerosol (downstream of a PAM chamber) of the NG engine, consisted of organic matter, nitrate, sulfate and ammonium, roughly in this order. It was found that aging of the exhaust generates low-volatility organics. However, the composition of the secondary aerosol was, for the most part, inorganic; the fraction of organic matter in the secondary particles varied between 37-56 %.

15 Exhaust after-treatment was found to have an effect on the secondary aerosol composition. High catalyst temperature promoted the formation of sulfate particles in total aged aerosol, whereas low catalyst ~~temperature~~ ~~temperatures~~ promoted nitrate formation. Because the ~~quantity~~ ~~amount of~~  $\text{NO}_x$  ~~emission~~ ~~emissions~~ was reduced at the lower catalyst temperatures, it was concluded that the formation of nitrate in particles (total aged) depended on the ~~ammonia concentration and~~ sulfate particle formation rather than the  $\text{NO}_x$  ~~emission~~ ~~emissions~~. Sulfate and nitrate are likely to exist in the forms of ammonium sulfate and ammonium nitrate. Therefore, what limits the nitrate mass in particles is most likely the availability of ammonia. ~~However, a more thorough research on the nitrate content in secondary aerosol is needed in order to confirm these findings which is more related to the exhaust after-treatment than fuel or combustion process.~~

20 The total aged nanoparticles formed from the natural gas exhaust were found to be less volatile than the primary particles. This can affect their lifetime in the atmosphere and therefore their impact on ~~the~~ radiative balance of the atmosphere or their potential to act as cloud nuclei. A higher catalyst temperature impacts the total aged particles by decreasing their volatility, ~~or~~ ~~or~~ by decreasing their volatile fraction.

25 In our study, only one constant PAM UV-light voltage could be used. With ~~an~~-improved instrumentation, a broader variation in light intensity could be achieved, thus improving our knowledge ~~in regarding~~ the evolution of the secondary aerosol ~~and providing a better understanding especially on the SOA production potential differences in different catalyst conditions~~. Also, because natural gas is not the only widely used gaseous fuel, the secondary aerosol formation potential of a more extensive fuel selection would be interesting to study. The role of lubricating oil is also not known yet – studies performed at different natural gas combustion sites and with various lubricating oils would reveal its significance to secondary aerosol formation.

## 30 5 Data and code availability

The data and code of this study are available from the authors upon request.

*Competing interests.*

The authors declare that they have no conflict of interest.

*Acknowledgements.* This study was funded by Tekes, the Finnish Funding Agency for Innovation, Neste, AGCO Power, Wärtsilä, Dinex Ecocat, Dekati, Suomi Analytics and Viking Line. Jenni Alanen acknowledges Gasum's gas funding for financial support. Pauli Simonen acknowledges the TUT Graduate School for its funding. Oskari Kangasniemi acknowledges the Nessling Foundation for its funding. Topi Rönkkö acknowledges the financial support from the Academy of Finland (ELTRAN project, grant number 293437).

## References

- Alanen, J., Saukko, E., Lehtoranta, K., Murtonen, T., Timonen, H., Hillamo, R., Karjalainen, P., Kuuluvainen, H., Harra, J., Keskinen, J., and Rönkkö, T.: The formation and physical properties of the particle emissions from a natural gas engine, *Fuel*, 162, 155–161, doi:10.1016/j.fuel.2015.09.003, 2015.
- 5 An, W. J., Pathak, R. K., Lee, B. H., and Pandis, S. N.: Aerosol volatility measurement using an improved thermodenuder: Application to secondary organic aerosol, *Journal of Aerosol Science*, 38, 305–314, doi:10.1016/j.jaerosci.2006.12.002, 2007.
- Anderson, M., Salo, K., and Fridell, E.: Particle- and Gaseous Emissions from an LNG Powered Ship, *Environmental Science and Technology*, 49, 12 568–12 575, doi:10.1021/acs.est.5b02678, 2015.
- 10 Arffman, A., Yli-Ojanperä, J., Kalliokoski, J., Harra, J., Pirjola, L., Karjalainen, P., Rönkkö, T., and Keskinen, J.: High-resolution low-pressure cascade impactor, *Journal of Aerosol Science*, 78, 97–109, doi:10.1016/j.jaerosci.2014.08.006, 2014.
- Arnold, F., Pirjola, L., Rönkkö, T., Reichl, U., Schlager, H., Lähde, T., Heikkilä, J., and Keskinen, J.: First online measurements of sulfuric acid gas in modern heavy-duty diesel engine exhaust: Implications for nanoparticle formation, *Environmental Science and Technology*, 46, 11 227–11 234, doi:10.1021/es302432s, 2012.
- 15 Atkinson, R., Baulch, D., Cox, R., Crowley, J., Hampson, R., Hynes, R., Jenkin, M., Kerr, J., Rossi, M., and Troe, J.: "IUPAC Subcommittee for gas kinetic data evaluation", *Evaluated kinetic data.*, <http://www.iupac-kinetic.ch.cam.ac.uk>, 2007.
- Bahreini, R., Middlebrook, A. M., Brock, C. A., Gouw, J. A. D., Mckeen, S. A., Williams, L. R., Daumit, K. E., Lambe, A. T., Massoli, P., Canagaratna, M. R., Ahmadov, R., Carrasquillo, A. J., Cross, E. S., Ervens, B., Holloway, J. S., Hunter, J. F., Onasch, T. B., Pollack, I. B., Roberts, J. M., Ryerson, T. B., Warneke, C., Davidovits, P., Worsnop, D. R., and Kroll, J. H.: Mass Spectral Analysis of Organic
- 20 Aerosol Formed Downwind of the Deepwater Horizon Oil Spill : Field Studies and Laboratory Confirmations, *Environmental Science & Technology*, 46, 8025–8034, doi:10.1126/science.1200320, 2012.
- Bielaczyc, P., Woodburn, J., and Szczotka, A.: An assessment of regulated emissions and CO<sub>2</sub> emissions from a European light-duty CNG-fueled vehicle in the context of Euro 6 emissions regulations, *Applied Energy*, 117, 134–141, doi:10.1016/j.apenergy.2013.12.003, 2014.
- Bruns, E. A., El Haddad, I., Keller, A., Klein, F., Kumar, N. K., Pieber, S. M., Corbin, J. C., Slowik, J. G., Brune, W. H., Baltensperger, U.,
- 25 and Prévôt, A. S. H.: Inter-comparison of laboratory smog chamber and flow reactor systems on organic aerosol yield and composition, *Atmospheric Measurement Techniques*, 8, 2315–2332, 2015.
- Bullock, D. S. and Olfert, J. S.: Size, volatility, and effective density of particulate emissions from a homogeneous charge compression ignition engine using compressed natural gas, *Journal of Aerosol Science*, 75, 1–8, doi:10.1016/j.jaerosci.2014.04.005, 2014.
- Burkholder, J. B., Sander, S. P., Abbatt, J., Barker, J. R., Huie, R. E., Kolb, C. E., Kurylo, M. J., Orkin, V. L., Wilmouth, D. M., and H., W. P.: "Chemical Kinetics and Photochemical Data for Use in Atmospheric Studies, Evaluation No. 18," JPL Publication 15-10, Jet Propulsion
- 30 Laboratory, Pasadena, <http://jpldataeval.jpl.nasa.gov>, 2015.
- Chirico, R., Decarlo, P. F., Heringa, M. F., Tritscher, T., Richter, R., Prévôt, A. S. H., Dommen, J., Weingartner, E., Wehrle, G., Gysel, M., Laborde, M., and Baltensperger, U.: Impact of aftertreatment devices on primary emissions and secondary organic aerosol formation potential from in-use diesel vehicles: Results from smog chamber experiments, *Atmospheric Chemistry and Physics*, 10, 11 545–11 563,
- 35 doi:10.5194/acp-10-11545-2010, 2010.
- Clegg, S. L. and Wexler, A. S.: Densities and Apparent Molar Volumes of Atmospherically Important Electrolyte Solutions. 2. The Systems H<sup>+</sup> – HSO<sub>4</sub><sup>-</sup> – SO<sub>4</sub><sup>2-</sup> – H<sub>2</sub>O from 0 to 3 mol kg<sup>-1</sup> as a Function of Temperature and H<sup>+</sup> – NH<sub>4</sub><sup>+</sup> – HSO<sub>4</sub><sup>-</sup> – SO<sub>4</sub><sup>2-</sup> – H<sub>2</sub>O from 0 to 6

- mol kg<sup>-1</sup> at 25 °C Using a Pitzer Ion Interaction Model, and NH<sub>4</sub>HSO<sub>4</sub> – H<sub>2</sub>O and (NH<sub>4</sub>)<sub>3</sub>H(SO<sub>4</sub>)<sub>2</sub> – H<sub>2</sub>O over Entire Concentration Range, *The Journal of Physical Chemistry A*, 115, 3461–3474, doi:10.1021/jp1089933, 2011.
- Damian, V., Sandu, A., Damian, M., Potra, F., and Carmichael, G. R.: The kinetic preprocessor KPP-a software environment for solving  
5 chemical kinetics, *Computers & Chemical Engineering*, 26, 1567–1579, doi:10.1016/S0098-1354(02)00128-X, 2002.
- Dockery, D. and Pope III, A.: Acute Respiratory Effects of Particulate Air Pollution., *Annual Review of Public Health*, 15, 107–132, 1994.
- Eichler, P., Muller, M., Rohmann, C., Stengel, B., Orasche, J., Zimmermann, R., and Wisthaler, A.: Lubricating Oil as a Major Constituent  
of Ship Exhaust Particles, *Environmental Science & Technology Letters*, 4, 54–58, 2017.
- Gentner, D. R., Jathar, S. H., Gordon, T. D., Bahreini, R., Day, D. A., Haddad, I. E., Hayes, P. L., Pieber, S. M., Platt, S. M., Gouw, J. D., Gold-  
10 stein, A. H., Harley, R. A., Jimenez, J. L., Prévôt, A. S. H., and Robinson, A. L.: Review of Urban Secondary Organic Aerosol Formation  
from Gasoline and Diesel Motor Vehicle Emissions, *Environmental Science & Technology*, 51, 1074–1096, doi:10.1021/acs.est.6b04509,  
2017.
- Gordon, T. D., Tkacik, D. S., Presto, A. A., Zhang, M., Jathar, S. H., Nguyen, N. T., Massetti, J., Truong, T., Cicero-Fernandez, P., Maddox,  
C., Rieger, P., Chattopadhyay, S., Maldonado, H., Maricq, M. M., and Robinson, A. L.: Primary gas- and particle-phase emissions and  
15 secondary organic aerosol production from gasoline and diesel off-road engines, *Environmental Science and Technology*, 47, 14 137–  
14 146, doi:10.1021/es403556e, 2013.
- Gordon, T. D., Presto, A. A., May, A. A., Nguyen, N. T., Lipsky, E. M., Donahue, N. M., Gutierrez, A., Zhang, M., Maddox, C., Rieger, P.,  
Chattopadhyay, S., Maldonado, H., Maricq, M. M., and Robinson, A. L.: Secondary organic aerosol formation exceeds primary particulate  
20 matter emissions for light-duty gasoline vehicles, *Atmospheric Chemistry and Physics*, 14, 4661–4678, doi:10.5194/acp-14-4661-2014,  
2014a.
- Gordon, T. D., Presto, A. A., Nguyen, N. T., Robertson, W. H., Na, K., Sahay, K. N., Zhang, M., Maddox, C., Rieger, P., Chattopadhyay,  
S., Maldonado, H., Maricq, M. M., and Robinson, A. L.: Secondary organic aerosol production from diesel vehicle exhaust: Impact of  
aftertreatment, fuel chemistry and driving cycle, *Atmospheric Chemistry and Physics*, 14, 4643–4659, doi:10.5194/acp-14-4643-2014,  
2014b.
- 25 Goyal, P. and Sidhartha: Present scenario of air quality in Delhi: A case study of CNG implementation, *Atmospheric Environment*, 37,  
5423–5431, doi:10.1016/j.atmosenv.2003.09.005, 2003.
- Graves, B., Olfert, J., Patychuk, B., Dastanpour, R., and Rogak, S.: Characterization of Particulate Matter Morphology and  
Volatility from a Compression-Ignition Natural-Gas Direct-Injection Engine, *Aerosol Science and Technology*, 49, 589–598,  
doi:10.1080/02786826.2015.1050482, 2015.
- 30 Hallquist, Å. M., Jerksjö, M., Fallgren, H., Westerlund, J., and Sjödin, Å.: Particle and gaseous emissions from individual diesel and CNG  
buses, *Atmospheric Chemistry and Physics*, 13, 5337–5350, doi:10.5194/acp-13-5337-2013, 2013.
- Hallquist, M., Wenger, J. C., Baltensperger, U., Rudich, Y., Simpson, D., Claeys, M., Dommen, J., Donahue, N. M., George, C., Goldstein,  
A. H., Hamilton, J. F., Herrmann, H., Hoffmann, T., Iinuma, Y., Jang, M., Jenkin, M., Jimenez, J. L., Kiendler-Scharr, A., Maenhaut, W.,  
McFiggans, G., Mentel, T. F., Monod, A., Prévôt, A. S. H., Seinfeld, J. H., Surratt, J. D., Szmigielski, R., and Wildt, J.: The formation,  
35 properties and impact of secondary organic aerosol: current and emerging issues, *Atmospheric Chemistry and Physics Discussions*, 9,  
3555–3762, 2009.
- Hanson, D. R. and Eisele, F.: Diffusion of H<sub>2</sub>SO<sub>4</sub> in Humidified Nitrogen: Hydrated H<sub>2</sub>SO<sub>4</sub>, *Journal of Physical Chemistry A*, 104, 1715–  
1719, 2000.

- Heeb, N. V., Saxer, C. J., Forss, A.-m., and Brühlmann, S.: Trends of NO-, NO<sub>2</sub>-, and NH<sub>3</sub> -emissions from gasoline-fueled Euro-3- to Euro-4-passenger cars, *Atmospheric Environment*, 42, 2543–2554, doi:10.1016/j.atmosenv.2007.12.008, 2008.
- Heeb, N. V., Haag, R., Seiler, C., Schmid, P., Zennegg, M., Wichser, A., Ulrich, A., Honegger, P., Zeyer, K., Emmenegger, L., Zimmerli, Y., Czerwinski, J., Kasper, M., and Mayer, A.: Effects of a Combined Diesel Particle Filter-DeNO<sub>x</sub> System (DPN) on Reactive Nitrogen Compounds Emissions: A Parameter Study, *Environmental Science & Technology*, 46, 13 317–13 325, 2012.
- Heikkilä, J., Rönkkö, T., Lähde, T., Lemmetty, M., Arffman, A., Virtanen, A., Keskinen, J., Pirjola, L., and Rothe, D.: Effect of open channel filter on particle emissions of modern diesel engine., *Journal of the Air & Waste Management Association (1995)*, 59, 1148–1154, doi:10.3155/1047-3289.59.10.1148, 2009.
- 10 Huang, R. J., Zhang, Y., Bozzetti, C., Ho, K. F., Cao, J. J., Han, Y., Daellenbach, K. R., Slowik, J. G., Platt, S. M., Canonaco, F., Zotter, P., Wolf, R., Pieber, S. M., Bruns, E. A., Crippa, M., Ciarelli, G., Piazzalunga, A., Schwikowski, M., Abbaszade, G., Schnelle-Kreis, J., Zimmermann, R., An, Z., Szidat, S., Baltensperger, U., El Haddad, I., and Prévôt, A. S.: High secondary aerosol contribution to particulate pollution during haze events in China, *Nature*, 514, 218–222, doi:10.1038/nature13774, 2014.
- Huffman, J. A., Docherty, K. S., Aiken, A. C., Cubison, M. J., Ulbrich, I. M., DeCarlo, P. F., Sueper, D., Jayne, J. T., Worsnop, D. R., 15 Ziemann, P. J., and Jimenez, J. L.: Chemically-resolved aerosol volatility measurements from two megacity field studies, *Atmospheric Chemistry and Physics*, 9, 7161–7182, doi:10.5194/acpd-9-2645-2009, 2009.
- Jathar, S. H., Miracolo, M. A., Tkacik, D. S., Donahue, N. M., Adams, P. J., and Robinson, A. L.: Secondary organic aerosol formation from photo-oxidation of unburned fuel: Experimental results and implications for aerosol formation from combustion emissions, *Environmental science & technology*, 47, 12 886–12 893, 2013.
- 20 Jathar, S. H., Friedman, B., Galang, A. A., Link, M. F., Brophy, P., Volckens, J., Eluri, S., and Farmer, D. K.: Linking Load , Fuel , and Emission Controls to Photochemical Production of Secondary Organic Aerosol from a Diesel Engine, *Environmental Science & Technology*, 51, 1377–1386, doi:10.1021/acs.est.6b04602, 2017.
- Jayaratne, E. R., Meyer, N. K., Ristovski, Z. D., Morawska, L., and Miljevic, B.: Critical Analysis of High Particle Number Emissions from Accelerating Compressed Natural Gas Buses, *Environmental Science and Technology*, 44, 3724–3731, 2010.
- 25 Jayaratne, E. R., Meyer, N. K., Ristovski, Z. D., and Morawska, L.: Volatile properties of particles emitted by compressed natural gas and diesel buses during steady-state and transient driving modes, *Environmental Science and Technology*, 46, 196–203, doi:10.1021/es2026856, 2012.
- Jenkin, M. E., Saunders, S. M., and Pilling, M. J.: The tropospheric degradation of volatile organic compounds: A protocol for mechanism development, *Atmospheric Environment*, 31, 81–104, doi:10.1016/S1352-2310(96)00105-7, 1997.
- 30 Jenkin, M. E., Saunders, S. M., Wagner, V., and Pilling, M. J.: Protocol for the development of the Master Chemical Mechanism, MCM v3 (Part A): tropospheric degradation of non-aromatic volatile organic compounds, *Atmospheric Chemistry and Physics*, 3, 161–180, doi:10.5194/acp-3-161-2003, 2003.
- Jimenez, J. L., Canagaratna, M. R., Donahue, N. M., Prevôt, A. S. H., Zhang, Q., Kroll, J. H., Decarlo, P. F., Allan, J. D., Coe, H., Ng, N. L., Aiken, A. C., Ulbrich, I. M., Grieshop, A. P., Duplissy, J., Wilson, K. R., Lanz, V. A., Hueglin, C., Sun, Y. L., Tian, J., Laaksonen, A., Raatikainen, T., Rautiainen, J., Vaattovaara, P., Ehn, M., Kulmala, M., Tomlinson, J. M., Cubison, M. J., Dunlea, E. J., Alfarra, M. R., Williams, P. I., Bower, K., Kondo, Y., Schneider, J., Drewnick, F., Borrmann, S., Weimer, S., Demerjian, K., Salcedo, D., Cottrell, L., Takami, A., Miyoshi, T., Shimojo, A., Sun, J. Y., Zhang, Y. M., Dzepina, K., Sueper, D., Jayne, J. T., Herndon, S. C., Williams, L. R., Wood, E. C., Middlebrook, A. M., Kolb, C. E., Baltensperger, U., and Worsnop, D. R.: Evolution of Organic Aerosols in the Atmosphere, *Science*, 326, 1525–1529, 2009.

- Johnson, T. V.: Review of diesel emissions and control, *International Journal of Engine Research*, 10, 275–285, 2009.
- Kanakidou, M., Seinfeld, J. H., Pandis, S. N., Barnes, I., Dentener, F. J., Facchini, M. C., Van Dingenen, R., Ervens, B., Nenes, A., Nielsen, C. J., Swietlicki, E., Putaud, J. P., Balkanski, Y., Fuzzi, S., Horth, J., Moortgat, G. K., Winterhalter, R., Myhre, C. E. L., Tsigaridis, K., Vignati, E., Stephanou, E. G., and Wilson, J.: Organic aerosol and global climate modelling: A review, *Atmospheric Chemistry and Physics*, 5, 1053–1123, 2005.
- 5 Kang, E., Root, M. J., and Brune, W. H.: Introducing the concept of Potential Aerosol Mass (PAM), *Atmospheric Chemistry and Physics Discussions*, 7, 9925–9972, doi:10.5194/acpd-7-9925-2007, 2007.
- Kang, E., Toohey, D. W., and Brune, W. H.: Dependence of SOA oxidation on organic aerosol mass concentration and OH exposure: Experimental PAM chamber studies, *Atmospheric Chemistry and Physics*, 11, 1837–1852, doi:10.5194/acp-11-1837-2011, 2011.
- 10 Karjalainen, P., Timonen, H., Saukko, E., Kuuluvainen, H., Saarikoski, S., Aakko-Saksa, P., Murtonen, T., Dal Maso, M., Ahlberg, E., Svenningsson, B., Brune, W. H., Hillamo, R., Keskinen, J., and Rönkkö, T.: Time-resolved characterization of primary and secondary particle emissions of a modern gasoline passenger car, *Atmospheric Chemistry and Physics*, 16, 8559–8470, doi:10.5194/acp-16-8559-2016, 2016.
- Künzi, L., Krapf, M., Daher, N., Dommen, J., Jeannet, N., Schneider, S., Platt, S., Slowik, J. G., Baumlin, N., Salathe, M., Prévôt, A. S. H., 15 Kalberer, M., Strähl, C., Dübngben, L., Sioutas, C., Baltensperger, U., and Geiser, M.: Toxicity of aged gasoline exhaust particles to normal and diseased airway epithelia, *Scientific Reports*, 5, 11 801, doi:10.1038/srep11801, 2015.
- Lambe, A. T., Ahern, A. T., Williams, L. R., Slowik, J. G., Wong, J. P. S., Abbatt, J. P. D., Brune, W. H., Ng, N. L., Wright, J. P., Croasdale, D. R., Worsnop, D. R., Davidovits, P., and Onasch, T. B.: Characterization of aerosol photooxidation flow reactors: Heterogeneous oxidation, secondary organic aerosol formation and cloud condensation nuclei activity measurements, *Atmospheric Measurement Techniques*, 20 4, 445–461, doi:10.5194/amt-4-445-2011, 2011.
- Lambe, A. T., Chhabra, P. S., Onasch, T. B., Brune, W. H., Hunter, J. F., Kroll, J. H., Cummings, M. J., Brogan, J. F., Parmar, Y., Worsnop, D. R., Kolb, C. E., and Davidovits, P.: Effect of oxidant concentration, exposure time, and seed particles on secondary organic aerosol chemical composition and yield, *Atmospheric Chemistry and Physics*, 15, 3063–3075, doi:10.5194/acp-15-3063-2015, 2015.
- Lehtoranta, K., Murtonen, T., Vesala, H., Koponen, P., Alanen, J., Simonen, P., Rönkkö, T., Timonen, H., Saarikoski, S., Maunula, T., 25 Kallinen, K., and Korhonen, S.: Natural gas engine emission reduction by catalysts, Submitted to *Emission Control Science & Technology*, 2016.
- Lelieveld, J., Evans, J. S., Fnais, M., Giannadaki, D., and Pozzer, A.: The contribution of outdoor air pollution sources to premature mortality on a global scale., *Nature*, 525, 367–71, doi:10.1038/nature15371, 2015.
- Link, M. F., Kim, J., Park, G., Lee, T., Park, T., Bin, Z., Sung, K., Kim, P., Kang, S., Soo, J., Choi, Y., Son, J., Lim, H.-j., and Farmer, 30 D. K.: Elevated production of NH<sub>4</sub>NO<sub>3</sub> from the photochemical processing of vehicle exhaust : Implications for air quality in the Seoul Metropolitan Region, *Atmospheric Environment*, 156, 95–101, doi:10.1016/j.atmosenv.2017.02.031, 2017.
- Mao, J., Ren, X., Brune, W. H., Olson, J. R., Crawford, J. H., Fried, A., Huey, L. G., Cohen, R. C., and Heikes, B.: Airborne measurement of OH reactivity during INTEX-B, *Atmospheric Chemistry and Physics*, 9, 163–173, 2009.
- May, A. A., Nguyen, N. T., Presto, A. A., Gordon, T. D., Lipsky, E. M., Karve, M., Gutierrez, A., Robertson, W. H., Zhang, M., Brandow, C., 35 Chang, O., Chen, S., Cicero-fernandez, P., Dinkins, L., Fuentes, M., Huang, S.-m., Ling, R., Long, J., Maddox, C., Massetti, J., Mccauley, E., Miguel, A., Na, K., Ong, R., Pang, Y., Rieger, P., Sax, T., Truong, T., Vo, T., Chattopadhyay, S., Maldonado, H., Maricq, M. M., and Robinson, A. L.: Gas- and particle-phase primary emissions from in-use , on-road gasoline and diesel vehicles, *Atmospheric Environment*, 88, 247–260, 2014.

- McWhinney, R. D., Gao, S. S., Zhou, S., and Abbatt, J. P. D.: Evaluation of the effects of ozone oxidation on redox-cycling activity of two-stroke engine exhaust particles, *Environmental Science and Technology*, 45, 2131–2136, doi:10.1021/es102874d, 2011.
- Middlebrook, A. M., Bahreini, R., Jimenez, J. L., and Canagaratna, M. R.: Evaluation of Composition-Dependent Collection Efficiencies for the Aerodyne Aerosol Mass Spectrometer using Field Data, *Aerosol Science and Technology*, 46, 258–271, doi:10.1080/02786826.2011.620041, 2012.
- Mikkanen, P. and Moisio, M.: Sampling Method for Particle Measurements of Vehicle Exhaust, *SAE International Journal of Fuels and Lubricants*, pp. 1–6, 2001.
- Mirme, A.: Electrical aerosol spectrometry, Ph.D. thesis, University of Tartu, 1994.
- 10 Murphy, B. N., Donahue, N. M., Robinson, A. L., and Pandis, S. N.: A naming convention for atmospheric organic aerosol, *Atmospheric Chemistry and Physics*, 14, 5825–5839, doi:10.5194/acp-14-5825-2014, 2014.
- Murtonen, T., Lehtoranta, K., Korhonen, S., and Vesala, H.: Imitating emission matrix of large natural catalyst studies in engine laboratory, CIMAC congress, 2016.
- Myhre, G., Shindell, D., Bréon, F. M., Collins, W., Fuglestedt, J., Huang, J., Koch, D., Lamarque, J. F., Lee, D., and Mendoza, B.: Anthropogenic and natural radiative forcing, *Climate change*, 423, 2013.
- 15 Nordin, E. Z., Eriksson, A. C., Roldin, P., Nilsson, P. T., Carlsson, J. E., Kajos, M. K., Hellén, H., Wittbom, C., Rissler, J., Löndahl, J., Swietlicki, E., Svenningsson, B., Bohgard, M., Kulmala, M., Hallquist, M., and Pagels, J. H.: Secondary organic aerosol formation from idling gasoline passenger vehicle emissions investigated in a smog chamber, *Atmospheric Chemistry and Physics*, 13, 6101–6116, doi:10.5194/acp-13-6101-2013, 2013.
- 20 Ntziachristos, L., Giechaskiel, B., Pistikopoulos, P., Samaras, Z., Mathis, U., Mohr, M., Ristimäki, J., Keskinen, J., Mikkänen, P., Casati, R., Scheer, V., and Vogt, R.: Performance evaluation of a novel sampling and measurement system for exhaust particle characterization, SAE 2004 World Congress and Exhibition, 2004-01-14, doi:10.4271/2004-01-1439, 2004.
- Ntziachristos, L., Saukko, E., Rönkkö, T., Lehtoranta, K., Timonen, H., Hillamo, R., and Keskinen, J.: Impact of sampling conditions and procedure on particulate matter emissions from a marine diesel engine, CIMAC congress, 2016.
- 25 Palm, B. B., Campuzano-jost, P., Ortega, A. M., Day, D. A., Kaser, L., Jud, W., Karl, T., Hansel, A., Hunter, J. F., Cross, E. S., Kroll, J. H., Peng, Z., Brune, W. H., and Jimenez, J. L.: In situ secondary organic aerosol formation from ambient pine forest air using an oxidation flow reactor, *Atmospheric Chemistry and Physics*, 16, 2943–2970, model found in PAM Wiki: Estimation Equations: Estimation Equations for LVOC Condensation Losses, <https://sites.google.com/site/pamwiki/hardware/estimation-equations>, Accessed: 2017-05-05, 2016.
- Pieber, S. M., Haddad, I. E., Slowik, J. G., Canagaratna, M. R., Jayne, J. T., Platt, S. M., Bozzetti, C., Daellenbach, K. R., Fro, R., Vlachou, A., Klein, F., Dommen, J., Miljevic, B., Jime, J. L., Worsnop, D. R., Baltensperger, U., and Prévôt, A. S. H.: Inorganic Salt Interference on CO<sub>2</sub>+ in Aerodyne AMS and ACSM Organic Aerosol Composition Studies, *Environmental Science & Technology*, 50, 10494–10503, doi:10.1021/acs.est.6b01035, 2016.
- 30 Pirjola, L., Dittrich, A., Niemi, J. V., Saarikoski, S., Timonen, H., Kuuluvainen, H., Järvinen, A., Kousa, A., Rönkkö, T., and Hillamo, R.: Physical and Chemical Characterization of Real-World Particle Number and Mass Emissions from City Buses in Finland, doi:10.1021/acs.est.5b04105, 2016.
- 35 Platt, S. M., El Haddad, I., Zardini, A. A., Clairotte, M., Astorga, C., Wolf, R., Slowik, J. G., Temime-Roussel, B., Marchand, N., Ježek, I., Drinovec, L., Mocnik, G., Möhler, O., Richter, R., Barmet, P., Bianchi, F., Baltensperger, U., and Prévôt, A. S. H.: Secondary organic aerosol formation from gasoline vehicle emissions in a new mobile environmental reaction chamber, *Atmospheric Chemistry and Physics*, 13, 9141–9158, doi:10.5194/acp-13-9141-2013, 2013.

- Pöschl, U., Canagaratna, M., Jayne, J. T., Molina, L. T., Worsnop, D. R., Kolb, C. E., and Molina, M. J.: Mass Accommodation Coefficient of H<sub>2</sub>SO<sub>4</sub> Vapor on Aqueous Sulfuric Acid Surfaces and Gaseous Diffusion Coefficient of H<sub>2</sub>SO<sub>4</sub> in N<sub>2</sub>/H<sub>2</sub>O, *Journal of Physical Chemistry A*, 102, 10 082–10 089, 1998.
- 5 Rager, J. E., Lichtveld, K., Ebersviller, S., Smeester, L., Jaspers, I., Sexton, K. G., and Fry, R. C.: A toxicogenomic comparison of primary and photochemically altered air pollutant mixtures, *Environmental Health Perspectives*, 119, 1583–1589, doi:10.1289/ehp.1003323, 2011.
- Robinson, A. L., Donahue, N. M., Shrivastava, M. K., Weitkamp, E. A., Sage, A. M., Grieshop, A. P., Lane, T. E., Pierce, J. R., and Pandis, S. N.: Rethinking Organic Aerosols: Semivolatile Emissions and Photochemical Aging, *Science*, 315, 1259–1262, doi:10.1126/science.1133061, 2007.
- 10 Rönkkö, T., Lähde, T., Heikkilä, J., Pirjola, L., Bauschke, U., Arnold, F., Schlager, H., Rothe, D., Yli-Ojanperä, J., and Keskinen, J.: Effects of gaseous sulphuric acid on diesel exhaust nanoparticle formation and characteristics, *Environmental Science and Technology*, 47, 11 882–11 889, doi:10.1021/es402354y, 2013.
- Samy, S. and Zielinska, B.: Secondary organic aerosol production from modern diesel engine emissions, *Atmospheric Chemistry and Physics*, 10, 609–625, 2010.
- 15 Saunders, S. M., Jenkin, M. E., Derwent, R. G., and Pilling, M. J.: Protocol for the development of the Master Chemical Mechanism, MCM v3 (Part A): tropospheric degradation of non-aromatic volatile organic compounds, *Atmospheric Chemistry and Physics*, 3, 161–180, doi:10.5194/acp-3-161-2003, 2003.
- Seinfeld, J. H. and Pandis, S. N.: *Atmospheric Chemistry and Physics: From Air Pollution to Climate Change*, Wiley, 3 edn., 2016.
- Simonen, P., Saukko, E., Karjalainen, P., Timonen, H., Bloss, M., and Aakko-Saksa, P.: A new oxidation flow reactor for measuring secondary aerosol formation of rapidly changing emission sources, *Atmospheric Measurement Techniques*, 10, 1519–1537, doi:10.5194/amt-10-1519-2017, 2017.
- 20 Suarez-Bertoa, R., Zardini, A. A., Lilova, V., Meyer, D., Nakatani, S., Hibel, F., Ewers, J., Clairotte, M., Hill, L., and Astorga, C.: Intercomparison of real-time tailpipe ammonia measurements from vehicles tested over the new world-harmonized light-duty vehicle test cycle (WLTC), *Environmental Science and Pollution Research*, 22, 7450–7460, 2015.
- 25 Tang, M. J., Shiraiwa, M., Pöschl, U., Cox, R. A., and Kalberer, M.: Compilation and evaluation of gas phase diffusion coefficients of reactive trace gases in the atmosphere : Volume 2 . Diffusivities of organic compounds , pressure-normalised mean free paths , and average Knudsen numbers for gas uptake calculations, *Atmospheric Chemistry and Physics*, 15, 5585–5598, doi:10.5194/acp-15-5585-2015, 2015.
- Thiruvengadam, A., Besch, M., Yoon, S., Collins, J., Kappanna, H., Carder, D., Ayala, A., Herner, J., and Gautam, M.: Characterization of particulate matter emissions from a current technology natural gas engine, *Environmental Science and Technology*, 48, 8235–8242, doi:10.1021/es5005973, 2014.
- 30 Timonen, H., Karjalainen, P., Saukko, E., Saarikoski, S., Aakko-saksa, P., and Simonen, P.: Influence of fuel ethanol content on primary emissions and secondary aerosol formation potential for a modern flex-fuel gasoline vehicle, *Atmospheric Chemistry and Physics*, 17, 5311–5329, doi:10.5194/acp-17-5311-2017, 2017.
- Tkacik, D. S., Lambe, A. T., Jathar, S., Li, X., Presto, A. A., Zhao, Y., Blake, D., Meinardi, S., Jayne, J. T., Croteau, P. L., and Robinson, A. L.: Secondary organic aerosol formation from in-use motor vehicle emissions using a potential aerosol mass reactor, *Environmental Science and Technology*, 48, 11 235–11 242, doi:10.1021/es502239v, 2014.
- 35 Virtanen, A., Joutsensaari, J., Koop, T., Kannosto, J., Yli-Pirilä, P., Leskinen, J., Mäkelä, J. M., Holopainen, J. K., Pöschl, U., Kulmala, M., Worsnop, D. R., and Laaksonen, A.: An amorphous solid state of biogenic secondary organic aerosol particles. *SI, Nature*, 467, 824–7, doi:10.1038/nature09455, 2010.



Weitkamp, E. A., Sage, A. M., Pierce, J. R., Donahue, N. M., and Robinson, A. L.: Organic aerosol formation from photochemical oxidation of diesel exhaust in a smog chamber, *Environmental Science and Technology*, 41, 6969–6975, doi:10.1021/es070193r, 2007.

Ziemann, P. J. and Atkinson, R.: Kinetics, products, and mechanisms of secondary organic aerosol formation, *Chemical Society Reviews*, 41, 6582–6605, doi:10.1039/c2cs35122f, 2012.

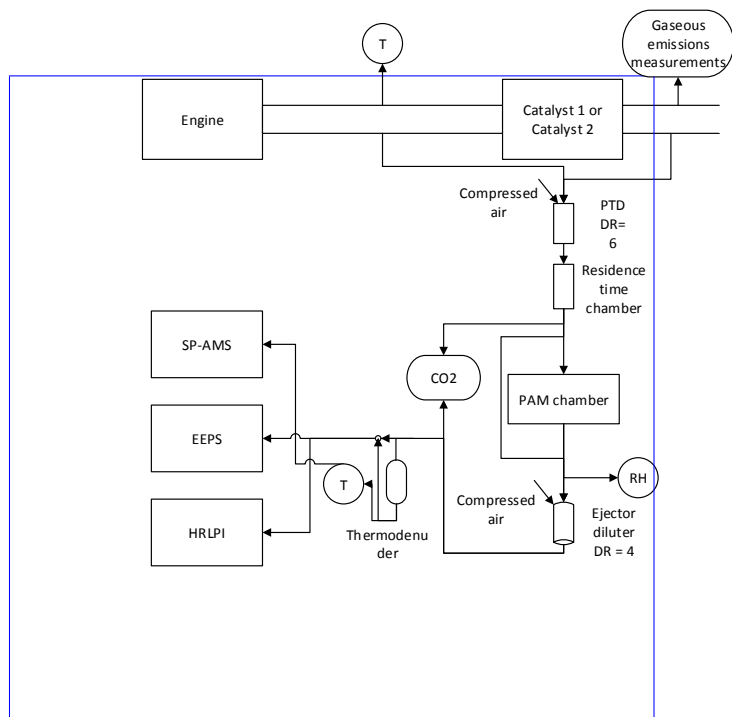

**Figure 1.** A schematic picture of the measurement setup.

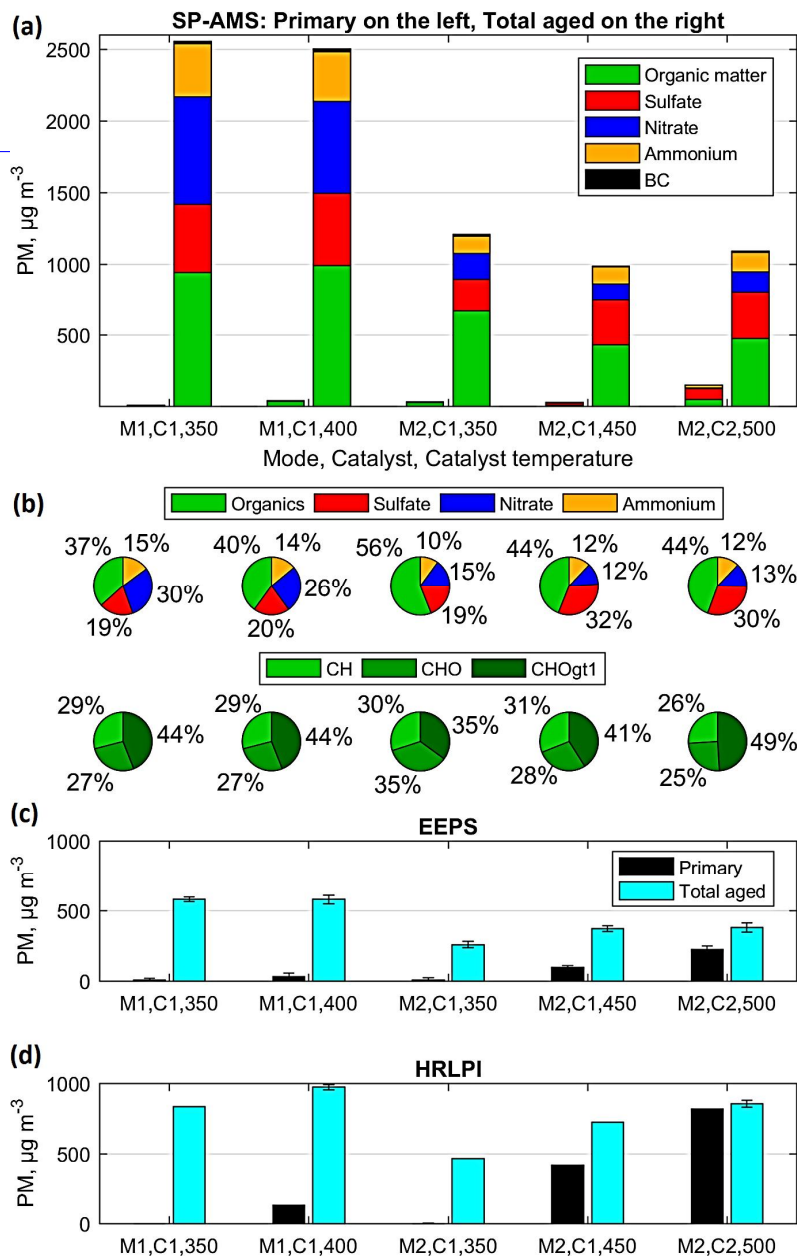

**Figure 2.** Exhaust primary and total aged particle mass concentrations measured by (a) SP-AMS, (c) EEPS and (d) HRLPI at different engine modes and catalyst temperatures. All values have been corrected by dilution ratio used in the sampling system. Secondary particle mass can be calculated by subtracting primary from total aged emission. The composition of the total aged particulate matter and the organic particulate matter is presented as pie charts (b). The fraction of black carbon is less or equal to 1 % and therefore left out from the pie charts.

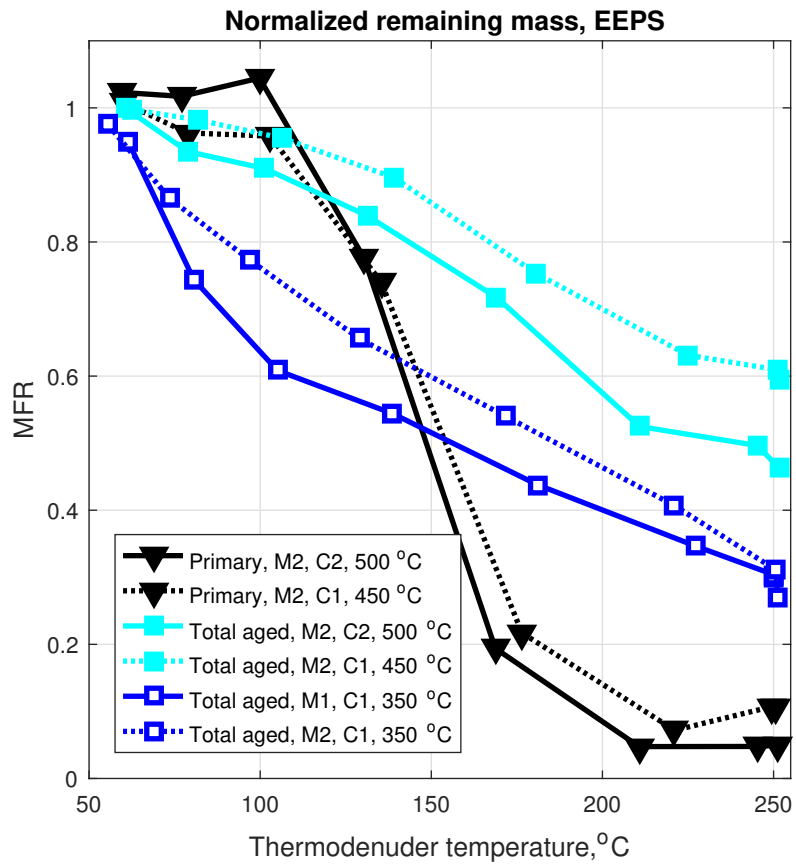

**Figure 3.** Results of particle volatility measurements. Particle mass fraction remaining (MFR) after the thermodenuder treatment for the exhaust aerosol sample of three different types of particle emission from the natural gas engine. MFR values were calculated from the size distributions measured by EEPS with unit mass assumption.

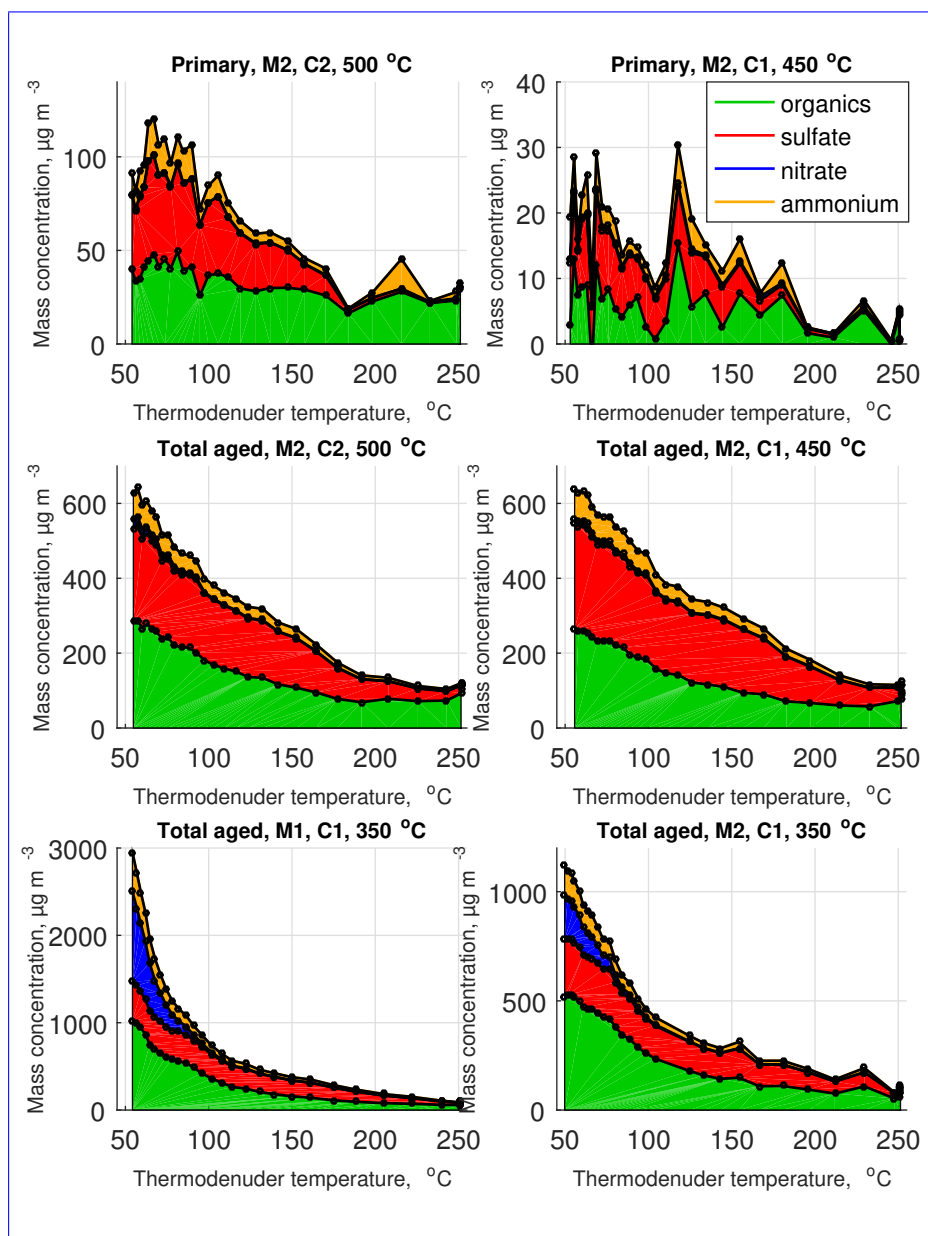

**Figure 4.** Concentration of different chemical compounds of particles remaining after the thermodenuder treatment conducted for the exhaust aerosol. The mass concentrations were measured using the SP-AMS at different thermodenuder temperatures and corrected by the dilution ratio used in the sampling system.

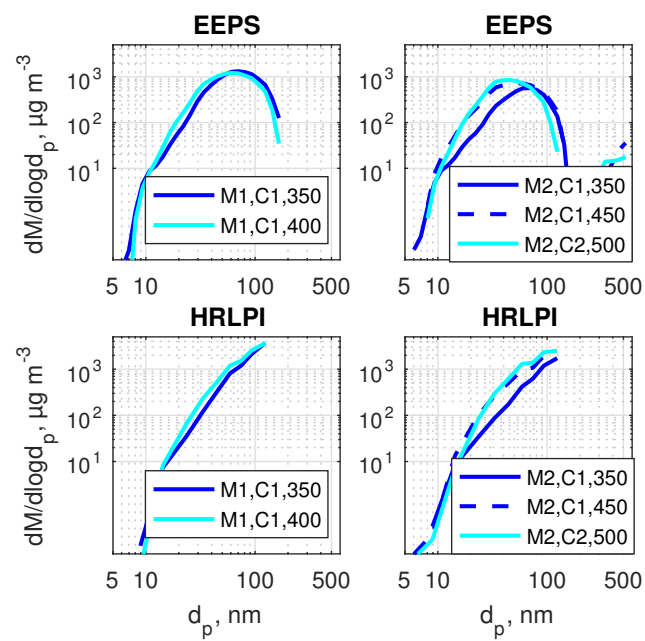

**Figure 5.** Particle mass size distributions measured by EEPS and HRLPI and corrected by the dilution ratios. Cases M1, C1 on the left, and cases M2, C1 and M2, C2 on the right. Cyan curves stand for the higher catalyst temperatures and blue for the lower ones.



**Figure 6.** Component-wise particle mass size distributions measured by SP-AMS and corrected by the dilution ratios.

**Table 1.** (a): Particle mass concentrations of primary and total aged particles (SP-AMS), increase of particle mass (%) in PAM chamber, calculated atmospheric ages simulated by PAM chamber and O/C ratios measured by SP-AMS. If no increase in PAM is presented, it is larger than 100 000 %. (b): The particle mass of species (SP-AMS) in all cases and are also presented in the table as well as (c): the concentrations of gaseous emissions in raw exhaust (published already in [Lehtoranta et al. \(2016\)](#)[Lehtoranta et al. 2016](#)). Values have been corrected by the dilution ratio used in the sampling system.

| (a)                                                          | M1, C1, 350 °C                | M1, C1, 400 °C              | M2, C1, 350 °C              | M2, C1, 450 °C              | M2, C2, 500 °C             |
|--------------------------------------------------------------|-------------------------------|-----------------------------|-----------------------------|-----------------------------|----------------------------|
| Primary PM, $\mu\text{g m}^{-3}$ , SP-AMS                    | <del>12</del> <u>9</u>        | 40                          | <del>40</del> <u>31</u>     | <del>27</del> <u>28</u>     | <del>141</del> <u>150</u>  |
| Total aged PM, $\mu\text{g m}^{-3}$ , SP-AMS                 | <del>2299</del> <u>2554</u>   | <del>2253</del> <u>2503</u> | <del>1089</del> <u>1210</u> | <del>890</del> <u>989</u>   | <del>986</del> <u>1093</u> |
| Increase in PAM, %, SP-AMS                                   | <del>18400</del> <u>26800</u> | <del>5560</del> <u>6210</u> | <del>2620</del> <u>3840</u> | <del>3190</del> <u>3440</u> | <del>598</del> <u>630</u>  |
| Increase in PAM, %, EEPS                                     | 7130                          | 1660                        | 2680                        | 278                         | 69                         |
| Increase in PAM, %, HRLPI                                    | -                             | 643                         | 22800                       | 75                          | 4                          |
| Atmospheric age, days                                        | 10.0                          | 10.7                        | 4.6                         | 4.7                         | 9.3                        |
| O/C                                                          | 1                             | 1.1                         | 1                           | 0.9                         | 1.2                        |
| (b): Total aged PM of species, $\mu\text{g m}^{-3}$ , SP-AMS |                               |                             |                             |                             |                            |
| Organic                                                      | <del>849</del> <u>944</u>     | <del>894</del> <u>993</u>   | <del>602</del> <u>669</u>   | <del>387</del> <u>430</u>   | <del>429</del> <u>476</u>  |
| Sulfate                                                      | <del>427</del> <u>475</u>     | <del>452</del> <u>502</u>   | <del>205</del> <u>228</u>   | <del>286</del> <u>317</u>   | <del>297</del> <u>330</u>  |
| Nitrate                                                      | <del>675</del> <u>749</u>     | <del>577</del> <u>641</u>   | <del>163</del> <u>182</u>   | <del>104</del> <u>115</u>   | <del>129</del> <u>143</u>  |
| Ammonium                                                     | <del>335</del> <u>372</u>     | <del>313</del> <u>348</u>   | <del>107</del> <u>119</u>   | <del>109</del> <u>121</u>   | <del>122</del> <u>135</u>  |
| (c): Concentrations of gaseous emissions, ppm                |                               |                             |                             |                             |                            |
| NO <sub>x</sub>                                              | 3                             | 4                           | 3                           | 12                          | 4                          |
| CO                                                           | 14                            | 7                           | 14                          | 8                           | 4                          |
| Methane                                                      | 906 ± 16                      | 904 ± 30                    | 2232 ± 74                   | 2238 ± 51                   | 1360 ± 7                   |
| Ethane                                                       | 18                            | 17                          | 68                          | 49                          | 15                         |
| Propane                                                      | 1                             | 1                           | 21                          | 6                           | 1                          |
| Ethene                                                       | 0                             | 0                           | 2                           | 0                           | 0                          |



**Table 2.** SOA production factors calculated from the SP-AMS data in this study, and in literature (Age = OH-exposure/ (1.5 \* 10<sup>6</sup> molecules cm<sup>-3</sup>)). [Primary organic aerosol has been subtracted from the total aged organic aerosol.](#) \*Calculated assuming gasoline density 0.75 kg l<sup>-1</sup> and consumption 7.9 l (100 km)<sup>-1</sup>.

| Source                                                     | Age                       | PF (mg kg <sub>fuel</sub> <sup>-1</sup> ) | Reference                             |
|------------------------------------------------------------|---------------------------|-------------------------------------------|---------------------------------------|
| NG engine:                                                 |                           |                                           |                                       |
| M1, C1, 350 °C                                             | 10 days                   | <del>17</del> <u>19</u>                   | This study                            |
| M1, C1, 400 °C                                             | 10.7 days                 | <del>18</del> <u>20</u>                   | This study                            |
| M2, C1, 350 °C                                             | 4.6 days                  | 12                                        | This study                            |
| M2, C1, 450 °C                                             | 4.7 days                  | <del>8</del> <u>9</u>                     | This study                            |
| M2, C2, 500 °C                                             | 9.3 days                  | <del>8</del> <u>9</u>                     | This study                            |
| <a href="#">Diesel/biodiesel nonroad engine, idling</a>    | <a href="#">1.5 days</a>  | <a href="#">5300-12000</a>                | <a href="#">Jathar et al. (2017)</a>  |
| <a href="#">Diesel/biodiesel nonroad engine, 50 % load</a> | <a href="#">0.8 days</a>  | <a href="#">400-900</a>                   | <a href="#">Jathar et al. (2017)</a>  |
| <a href="#">Ethanol vehicle, NEDC cycle</a>                | <a href="#">~1-8 days</a> | <a href="#">&lt;2 *</a>                   | <a href="#">Timonen et al. (2017)</a> |
| Gasoline vehicle, parts of NEDC cycle                      | ~1-8 days                 | 7-155 *                                   | Karjalainen et al. (2016)             |
| Vehicle fleet in highway tunnel                            | 5.4 days                  | 350                                       | Tkacik et al. (2014)                  |
| Gasoline vehicle, hot start                                | 3 h                       | 13.8                                      | Gordon et al. (2014a)                 |
| Gasoline vehicle, cold start                               | 3 h                       | 19-60                                     | Gordon et al. (2014a)                 |
| Gasoline vehicles, idling                                  | 3-6 h                     | 5-90                                      | Nordin et al. (2013)                  |
| Gasoline vehicles, cold start                              | Unknown                   | 480                                       | Nordin et al. (2013)                  |
| Gasoline vehicle, NEDC cycle                               | 8 h                       | 345                                       | Platt et al. (2013)                   |
| Small 2-stroke off-road engine                             | 1-7 h                     | 240-1400                                  | Gordon et al. (2013)                  |
| Small 4-stroke off-road engine                             | 1 h                       | 100-130                                   | Gordon et al. (2013)                  |
| Diesel vehicle, deactivated catalyst                       | Unknown                   | 230-560                                   | Chirico et al. (2010)                 |
| Diesel vehicle, catalyst working                           | Unknown                   | 12-20                                     | Chirico et al. (2010)                 |

**Table 3.** The temperatures where 50 % of the volatile fraction of species has evaporated.

| T <sub>volatile, 50 %</sub><br>(°C) | Primary                   | Primary        | Total aged                | Total aged                | Total aged                | Total aged                |
|-------------------------------------|---------------------------|----------------|---------------------------|---------------------------|---------------------------|---------------------------|
|                                     | M2, C2, 500 °C            | M2, C1, 450 °C | M2, C2, 500 °C            | M2, C1, 450 °C            | M1, C1, 350 °C            | M2, C1, 350 °C            |
| Organics                            | <del>98</del> <u>115</u>  | -              | <del>119</del> <u>99</u>  | <del>123</del> <u>104</u> | <del>84</del> <u>87</u>   | <del>104</del> <u>93</u>  |
| Sulfate                             | <del>145</del> <u>125</u> | -              | <del>172</del> <u>152</u> | <del>187</del> <u>168</u> | <del>162</del> <u>120</u> | <del>185</del> <u>147</u> |
| Nitrate                             | <del>82</del> <u>72</u>   | -              | <del>81</del> <u>80</u>   | <del>91</del> <u>84</u>   | 65                        | 65                        |
| Ammonium                            | <del>100</del> <u>104</u> | -              | <del>135</del> <u>97</u>  | <del>151</del> <u>112</u> | 70                        | 79                        |

## Supplementary material for “Comparison of primary and secondary particle formation from natural gas engine exhaust and of their volatility characteristics”

Alanen et al. (2017), Atmospheric Chemistry and Physics

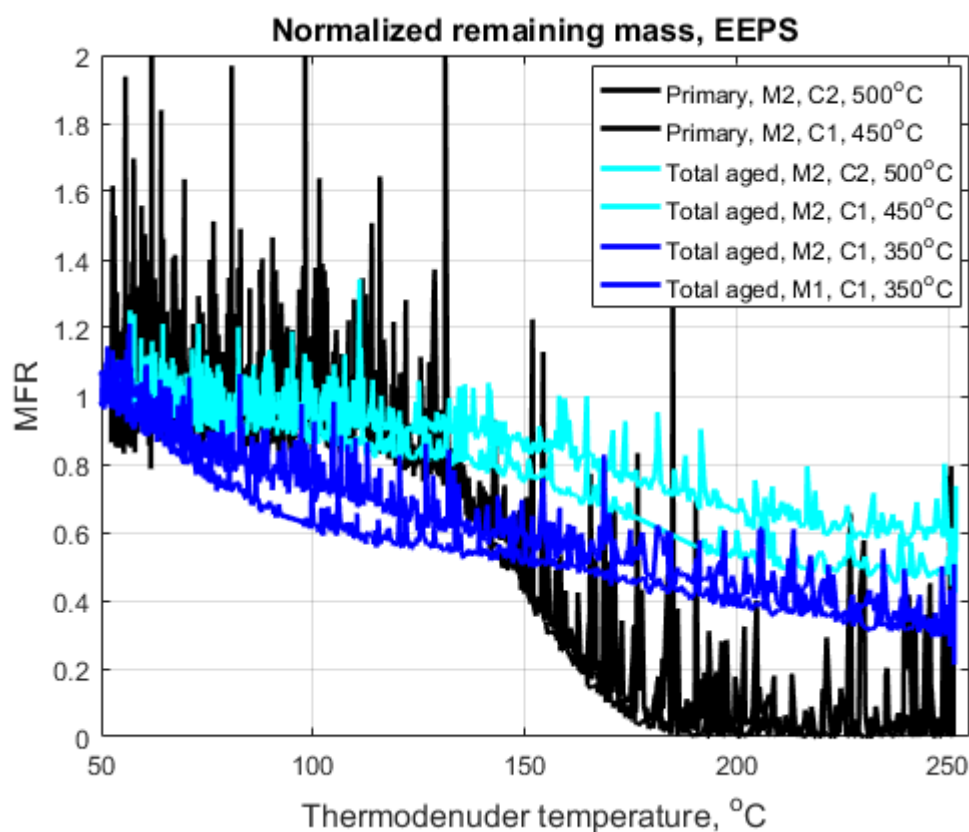

*S1 Original one-second-resolution results of particle volatility measurements. Particle mass fraction remaining (MFR) after the thermodenuder treatment for the exhaust aerosol sample of three different types of particle emission from the natural gas engine. MFR values were calculated from the size distributions measured by EEPS with unit mass assumption.*

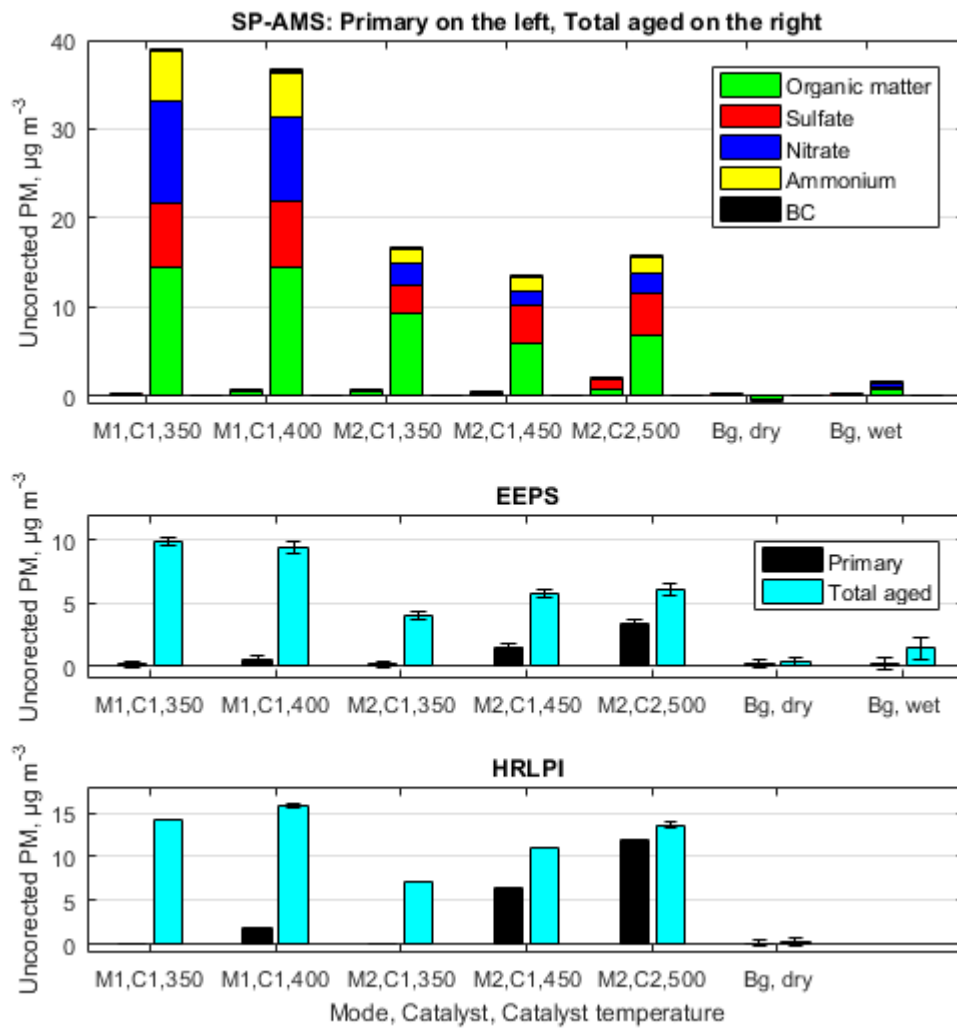

*S2 Exhaust primary and total aged particle mass concentrations, compared with blank measurements, measured by SP-AMS, EEPS and HRLPI at different engine modes and catalyst temperatures.*

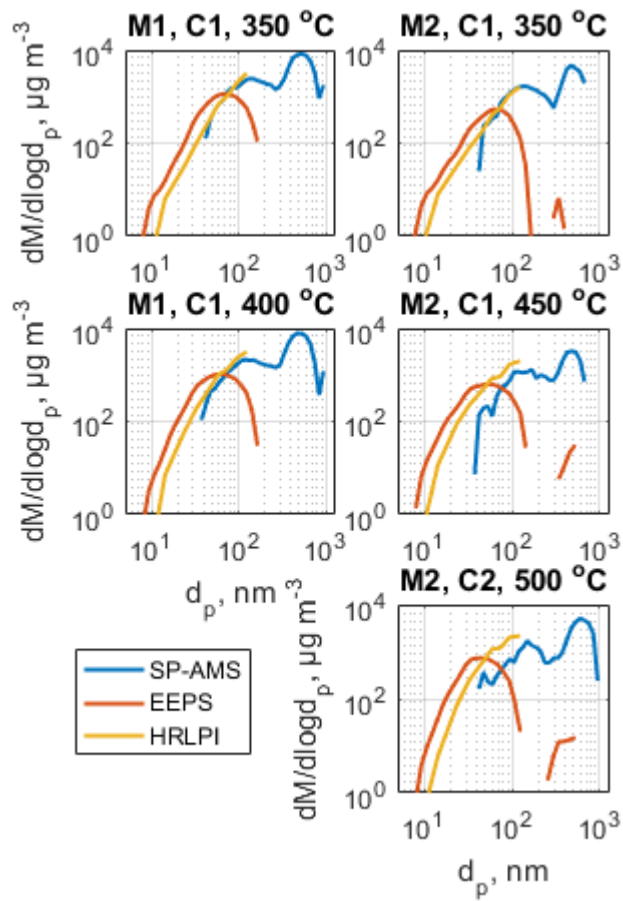

S3 Particle mass size distributions measured with SP-AMS, HRLPI and EEPS. Note that  $d_p$  stands for aerodynamic diameter for HRLPI, vacuum aerodynamic diameter for SP-AMS and mobility diameter for EEPS.
