# Supplementary figures and images for: Comparison of primary and secondary particle formation from natural gas engine exhaust and of their volatility characteristics
Source: Copernicus journal article supplement (doi:10.5194/acp-2017-44), 2017-02-08

Normalized remaining mass, EEPS

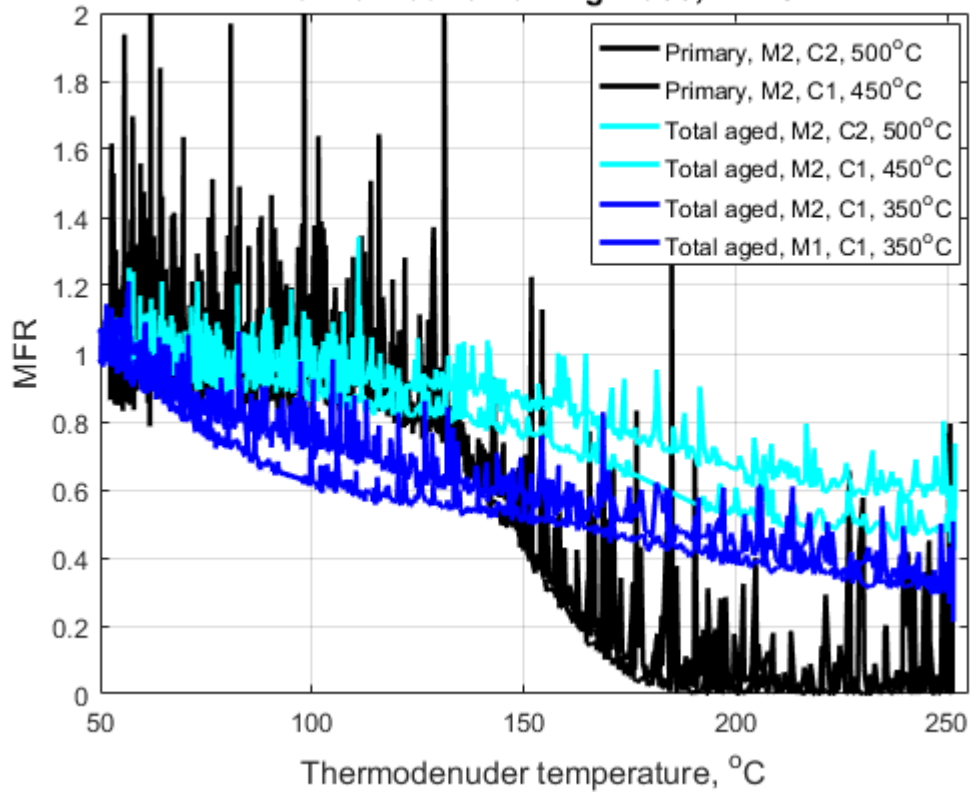

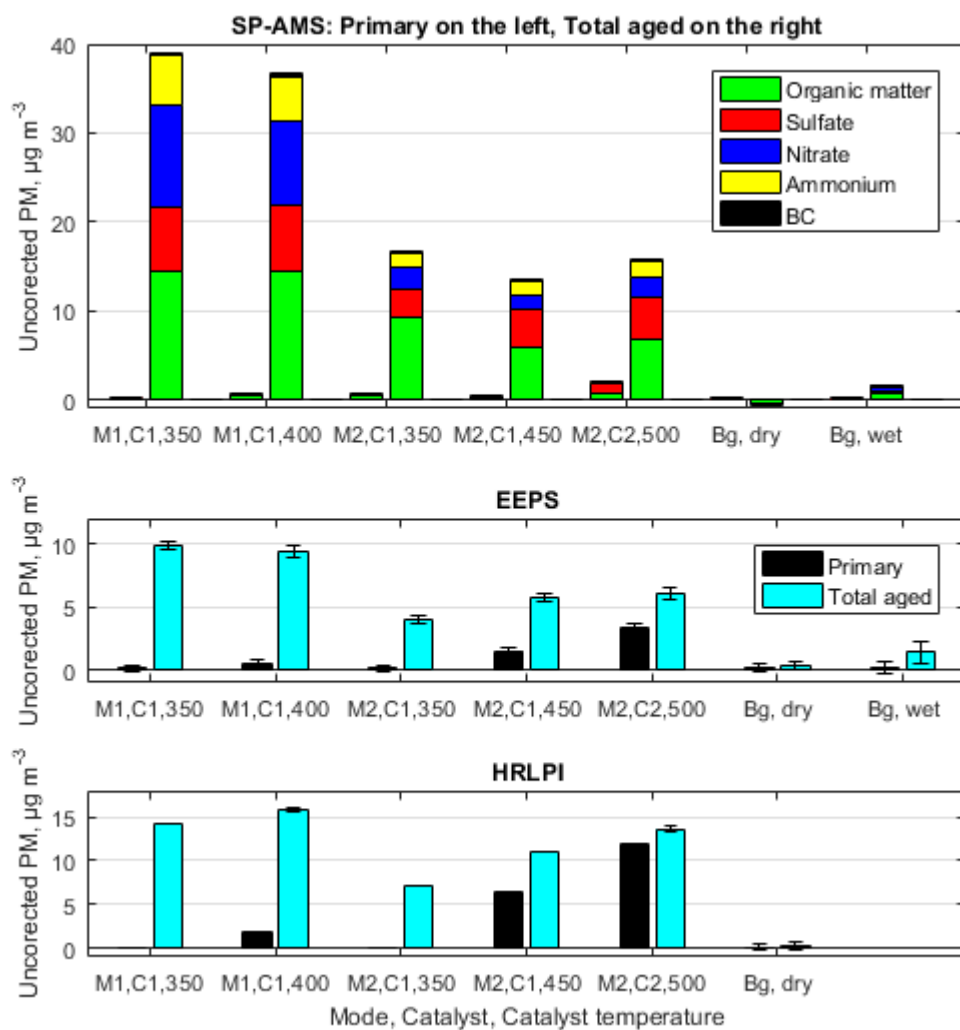

Supplement: Supplementary file 1 [file acp-2017-44-supplement.pdf]
